# Supplementary material for: Enantio- and diastereoselective addition of cyclohexylMeldrum's acid to β- and α,β-disubstituted nitroalkenesvia N-sulfinyl urea catalysis
Source: Royal Society of Chemistry journal article supplement (doi:10.1039/c1sc00441g), 2011-08-25
Supplement: c1sc00441g.pdf [file c1sc00441g.pdf]

# **Enantio- and Diastereoselective Addition of Cyclohexyl Meldrum's Acid to $\beta$ - and $\alpha,\beta$ -Disubstituted Nitroalkenes via *N*-Sulfinyl Urea Catalysis**

Kyle L. Kimmel, Jimmie Weaver and Jonathan A. Ellman\*

*Department of Chemistry, Yale University, Connecticut 06511*

[jonathan.ellman@yale.edu](mailto:jonathan.ellman@yale.edu)

## **Supporting Information**

### **Table of Contents**

|                                        |          |
|----------------------------------------|----------|
| I. General Methods                     | S2       |
| II. Synthesis of Sulfinyl Ureas        | S3-S6    |
| III. Catalytic Meldrum's Acid Addition | S7-S18   |
| IV. Synthesis of $\gamma$ -Amino Acids | S19-S25  |
| V. References                          | S26      |
| VI. NMR spectra                        | S27-S84  |
| VII. HPLC data                         | S85-S103 |

**General Experimental.** All reagents were obtained from commercial suppliers and used without further purification unless otherwise noted. Cyclopentyl methyl ether (CPME), tetrahydrofuran (THF), diethyl ether, methylene chloride ( $\text{CH}_2\text{Cl}_2$ ) and dioxane were passed through columns of activated alumina under nitrogen pressure immediately prior to use. Cyclopentyl methyl ether was additionally distilled prior to passage through alumina to remove BHT stabilizer. All urea catalysts were dried under high vacuum over fresh  $\text{P}_2\text{O}_5$  overnight prior to use. Dry potassium hydride was stored and weighed under inert atmosphere in the glove box. Diamine *S-1*<sup>1</sup> and triisopropylbenzenesulfonamide<sup>2,3</sup> were prepared according to literature procedures. Reactions were monitored by thin layer chromatography (TLC) and visualized with ultraviolet light and potassium permanganate stain. Flash column chromatography was carried out with Merck 60 230-240 mesh silica gel. NMR spectra were obtained on a Bruker AVB-400, Bruker AVB-500 or Varian 400 spectrometer, and unless otherwise noted,  $^1\text{H}$  and  $^{13}\text{C}$  NMR chemical shifts are reported in ppm relative to either the residual solvent peak ( $^1\text{H}$ ,  $^{13}\text{C}$ ) or TMS ( $^1\text{H}$ ) as an internal standard. Enantiomeric excess was determined using an Agilent 1100 or 1200 series HPLC equipped with a Chiralcel IA column and a multiwavelength detector. IR spectra were recorded on a Nicolet 6700 FTIR spectrometer equipped with an attenuated total reflectance accessory as thin films on a KBr beamsplitter, and only partial data are listed. Melting points were determined on a Mel-Temp apparatus and are reported uncorrected. Specific rotations were determined using a Perkin-Elmer 341 polarimeter with a sodium lamp, and concentrations are reported in g/dL. Mass spectra (HRMS) analysis was performed by the Yale Protein Expression Database facility on a 9.4T Bruker Qe FT-ICR MS.

**General Procedure for the Preparation of Sulfinyl Ureas (Procedure A).**<sup>4</sup> To an oven-dried round-bottomed flask equipped with a magnetic stir bar and N<sub>2</sub> inlet was added potassium hydride (3 equiv) and sulfinamide (1.0 equiv). The reaction flask was cooled in an ice-water bath, and THF (0.6 M) was added. The suspension was stirred at 0 °C until bubbling ceased. The ice-water bath was removed, and the reaction mixture was allowed to warm to ambient temperature. 1,1'-Carbonyldiimidazole (1.0 equiv) was dissolved in 1,4-dioxane (1.0 M) and added to the reaction mixture, resulting in the formation of a white precipitate, and the reaction mixture was stirred for 1 h. A solution of diamine (1.2 equiv) in THF (1.0 M) was added, and the suspension was stirred at room temperature for 15-24 h. The reaction was quenched with a solution of acetic acid (3 equiv) in THF (1.0 M). The crude product was concentrated *in vacuo* and purified by chromatography or recrystallization.

**General Procedure for the Preparation of Sulfinyl Ureas (Procedure B).**<sup>5</sup> To a solution of sulfinyl urea **9** in acetonitrile (0.2 M) was added the appropriate aldehyde (5 equiv). After the reaction mixture was stirred for 15 min, NaBH<sub>3</sub>CN (2.1 equiv), and 15 min later, acetic acid (5 equiv) were added. The reaction mixture was stirred 3-12 h, then quenched by addition of 1 N NaOH<sub>(aq)</sub>. The aqueous layer was extracted with ethyl acetate, and the organic layer was washed with 1 N NaOH. The crude product was concentrated *in vacuo* and purified by reverse phase chromatography.

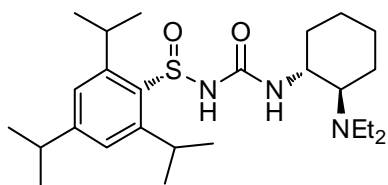

**Urea 4.** The general procedure (B) was followed using urea **7** (50 mg, 0.12 mmol), acetaldehyde (70  $\mu$ L, 0.62 mmol), NaBH<sub>3</sub>CN (17 mg, 0.25 mmol), and acetic acid (35  $\mu$ L, 0.62 mmol). Sulfinyl urea **4** was purified by reverse phase chromatography (1:1

MeOH:H<sub>2</sub>O to 100% MeOH), to yield 30 mg (53% yield) of a white solid, mp 170 °C. IR: 2965, 2931, 1735, 1666, 1628, 1535, 1385, 1265, 1088 cm<sup>-1</sup>. <sup>1</sup>H NMR (400 MHz, MeOH-*d*<sub>4</sub>) δ 7.12 (s, 2H), 4.05 – 3.61 (br s, 2H), 3.61 – 3.36 (m, 1H), 2.96 – 2.68 (septet, *J* = 6.9 Hz, 1H), 2.68 – 2.42 (m, 2H), 2.42 – 2.12 (m, 4H), 1.92 – 1.74 (m, 1H), 1.73 – 1.65 (m, 1H), 1.65 – 1.52 (m, 1H), 1.28 (d, *J* = 6.9 Hz, 6H), 1.18 (d, *J* = 6.9 Hz, 3H), 1.17 (d, *J* = 6.9 Hz, 3H), 1.15 (d, *J* = 6.9 Hz, 6H), 1.22-1.13 (m, 4H), 0.88 (t, *J* = 7.1 Hz, 6H). <sup>13</sup>C NMR (126 MHz, CDCl<sub>3</sub>) δ 155.07, 152.83, 148.22, 136.62, 123.19, 77.20, 62.71, 52.08, 42.90, 34.33, 32.58, 28.47, 25.74, 24.54, 24.45, 23.99, 23.70, 23.68, 23.33, 14.66. HRMS (ESI) calcd for C<sub>26</sub>H<sub>45</sub>O<sub>2</sub>N<sub>3</sub>S [M+H]<sup>+</sup> 464.33053; found 464.32943.

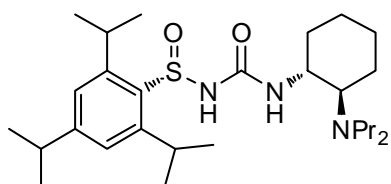

**Urea 5.** The general procedure (B) was followed using urea 7 (50 mg, 0.12 mmol), propionaldehyde (44 μL, 0.62 mmol), NaBH<sub>3</sub>CN (17 mg, 0.25 mmol), and acetic acid (35 μL, 0.62 mmol).

Sulfinyl urea **5** was purified by reverse phase chromatography (1:1 MeOH:H<sub>2</sub>O to 100% MeOH), to yield 33 mg (55% yield) of a white solid, mp 156-157 °C. IR: 3264, 2958, 2930, 2869, 1656, 1597, 1534, 1461, 1383, 1264, 1074, 877 cm<sup>-1</sup>. <sup>1</sup>H NMR (400 MHz, MeOH-*d*<sub>4</sub>) δ 7.22 (s, 2H), 3.89 (br s, 2H), 3.54 (td, *J* = 10.8, 4.0 Hz, 1H), 2.94 (septet, *J* = 6.9 Hz, 1H), 2.53 – 2.22 (m, 5H), 1.97 – 1.86 (m, 1H), 1.86 – 1.77 (m, 1H), 1.71 (m, 1H), 1.38 (d, *J* = 6.8 Hz, 6H), 1.28 (d, *J* = 6.8 Hz, 3H), 1.27 (d, *J* = 6.8 Hz, 3H), 1.24 (d, *J* = 6.8 Hz, 6H), 1.49 – 1.12 (m, 7H), 0.96 – 0.93 (m, 2H), 0.83 (t, *J* = 7.4 Hz, 6H). <sup>13</sup>C NMR (126 MHz, CDCl<sub>3</sub>) δ 155.11, 152.85, 148.15, 136.82, 123.16, 77.19, 73.93, 63.30, 52.14, 51.60, 34.34, 32.60, 28.46, 25.74, 24.54, 24.44, 24.00, 23.69, 23.14, 22.26, 11.84. HRMS (ESI) calcd for C<sub>28</sub>H<sub>49</sub>O<sub>2</sub>N<sub>3</sub>S [M+H]<sup>+</sup> 492.36183; found 492.36060.

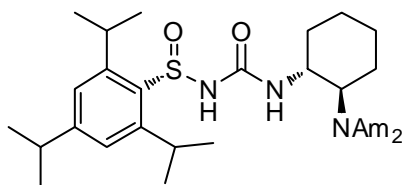

**Urea 6.** The general procedure (B) was followed using urea **7** (50 mg, 0.12 mmol), valeraldehyde (66  $\mu$ L, 0.62 mmol),  $\text{NaBH}_3\text{CN}$  (17 mg, 0.25 mmol), and acetic acid (35  $\mu$ L, 0.62 mmol). Sulfanyl urea **6** was purified by reverse phase chromatography (1:1 MeOH:H<sub>2</sub>O to 100% MeOH), to yield 48 mg (72% yield) of a white solid, mp 166-167 °C. IR: 2959, 2930, 2860, 1669, 1597, 1486, 1384, 1264, 1095  $\text{cm}^{-1}$ . <sup>1</sup>H NMR (400 MHz, MeOH-*d*<sub>4</sub>)  $\delta$  7.22 (s, 2H), 3.92 (br s, 2H), 3.55 (m, 1H), 2.99 – 2.89 (septet,  $J = 6.8$  Hz, 1H), 2.60 – 2.21 (m, 6H), 1.89 (m, 1H), 1.84, (m, 1H), 1.72 (m, 1H), 1.38 (d,  $J = 6.8$  Hz, 6H), 1.27 (d,  $J = 6.8$  Hz, 3H), 1.26 (d,  $J = 6.8$  Hz, 3H), 1.25 (d,  $J = 6.8$  Hz, 6H), 1.47 – 1.12 (m, 16H), 0.87 (t,  $J = 7.0$  Hz, 6H). <sup>13</sup>C NMR (101 MHz, CDCl<sub>3</sub>)  $\delta$  155.10, 152.77, 148.17, 136.95, 123.24, 63.15, 52.16, 49.54, 34.35, 32.49, 29.61, 28.80, 28.47, 25.75, 24.55, 24.42, 24.02, 23.71, 23.11, 22.58, 14.00. HRMS (ESI) calcd for C<sub>32</sub>H<sub>57</sub>O<sub>2</sub>N<sub>3</sub>S [M+H]<sup>+</sup> 548.42443; found 548.42200.

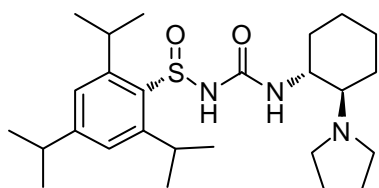

**Urea 7.** The general procedure (B) was followed using urea **7** (50 mg, 0.12 mmol), succinaldehyde<sub>(aq)</sub><sup>6</sup> (0.41 mL, 1.5 M),  $\text{NaBH}_3\text{CN}$  (17 mg, 0.25 mmol), and acetic acid (35  $\mu$ L, 0.62 mmol). Sulfanyl urea **7** was purified by reverse phase chromatography (1:1 MeOH:H<sub>2</sub>O to 100% MeOH), to yield 27 mg (47% yield) of a white solid, mp 114-115 °C. IR: 2964, 2935, 2868, 1666, 1597, 1540, 1384, 1264, 1075, 906  $\text{cm}^{-1}$ . <sup>1</sup>H NMR (400 MHz, MeOH-*d*<sub>4</sub>)  $\delta$  7.23 (s, 2H), 3.94 (br s, 2H), 3.68 – 3.59 (m, 1H), 3.00 – 2.91 (septet,  $J = 6.8$  Hz, 1H), 2.77 – 2.56 (m, 4H), 2.50 (m, 1H), 2.22 (m, 1H), 1.89-1.80 (m, 2H), 1.78-1.66 (m, 5H), 1.45-1.30 (m, 4H), 1.39 (d,  $J = 6.8$  Hz, 6H), 1.28 (d,  $J = 6.8$  Hz, 3H), 1.27 (d,  $J = 6.8$  Hz, 3H), 1.24 (d,  $J = 6.8$  Hz, 6H). <sup>13</sup>C NMR (126 MHz, CDCl<sub>3</sub>)  $\delta$  155.51,

153.27, 148.77, 137.05, 123.65, 77.63, 62.41, 53.84, 47.59, 34.79, 32.70, 28.89, 25.32, 24.97, 24.72, 24.47, 24.15, 22.66. HRMS (ESI) calcd for  $C_{26}H_{43}O_2N_3S$   $[M+H]^+$  462.31488; found 462.31407.

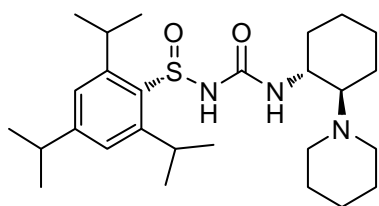

**Urea 8.** The general procedure (A) was followed using (*S*)-triisopropylbenzenesulfinamide (4.0 g, 15 mmol), potassium hydride (1.8 g, 45 mmol), 1,1'-carbonyldiimidazole (2.4 g, 15 mmol), and (*R,R*)-diamine **S-1** (3.3 g, 18 mmol). Sulfinyl urea **8** was purified by trituration with methanol/water, then recrystallization from 0.4 L of warm methanol, to yield 4.1 g (59% yield) of a white solid, mp 169 °C. IR: 3325, 2959, 2929, 2855, 2799, 1655, 1597, 1535, 1384, 1206, 1076, 839  $cm^{-1}$ .  $^1H$  NMR (500 MHz, MeOH- $d_4$ )  $\delta$  7.11 (s, 2H), 3.81 (br s, 2H), 3.48 – 3.40 (m, 1H), 2.83 (septet,  $J = 6.9$  Hz, 1H), 2.53 (m, 2H), 2.27 – 2.10 (m, 4H), 1.79 (m, 1H), 1.69 (m, 1H), 1.59 (m, 1H), 1.43 – 0.98 (m, 10H), 1.27 (d,  $J = 6.8$  Hz, 6H), 1.16 (d,  $J = 6.8$  Hz, 3H), 1.15 (d,  $J = 6.8$  Hz, 3H), 1.14 (d,  $J = 6.8$  Hz, 6H).  $^{13}C$  NMR (101 MHz,  $CDCl_3$ )  $\delta$  155.49, 152.94, 148.62, 136.73, 123.34, 67.99, 51.77, 50.51, 49.41, 34.55, 33.08, 28.70, 26.75, 25.80, 25.07, 24.79, 24.20, 23.96, 23.91, 23.30. HRMS (ESI) calcd for  $C_{27}H_{45}O_2N_3S$   $[M+H]^+$  476.33053; found 476.32973.

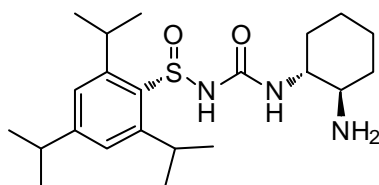

**Urea 9.** The general procedure (A) was followed using (*S*)-triisopropylbenzenesulfinamide (0.27 g, 1.0 mmol), potassium hydride (0.12 g, 3.0 mmol), 1,1'-carbonyldiimidazole (0.16 g, 1.0 mmol), and (1*R*,2*R*)-(-)-*trans*-1,2-cyclohexanediamine (0.34 g, 3.0 mmol). Sulfinyl urea **9** was purified by reverse phase chromatography (5:95 MeOH:H<sub>2</sub>O to 100% MeOH), to yield 0.27 g (65% yield) of a white solid, mp 205 °C.

IR: 3301, 2960, 2928, 2864, 1664, 1597, 1543, 1384, 1057, 877  $\text{cm}^{-1}$ .  $^1\text{H}$  NMR (400 MHz,  $\text{MeOH-}d_4$ )  $\delta$  7.22 (s, 2H), 3.95 (br s, 2H), 3.45 – 3.36 (m, 1H), 3.01 – 2.84 (septet,  $J = 6.8$  Hz, 1H), 2.46 (m, 1H), 2.11 – 1.89 (m, 2H), 1.76-1.70 (m, 2H), 1.42 – 1.22 (m, 4H), 1.38 (d,  $J = 6.8$  Hz, 6H), 1.28 (d,  $J = 6.8$  Hz, 3H), 1.27 (d,  $J = 6.8$  Hz, 3H), 1.25 (d,  $J = 6.8$  Hz, 6H).  $^{13}\text{C}$  NMR (126 MHz,  $\text{MeOH-}d_4$ )  $\delta$  158.84, 154.63, 150.56, 137.47, 124.67, 57.83, 56.24, 36.08, 35.06, 33.90, 30.29, 26.58, 26.25, 25.56, 24.72. HRMS (ESI) calcd for  $\text{C}_{22}\text{H}_{37}\text{O}_2\text{N}_3\text{S}$   $[\text{M}+\text{H}]^+$  408.26793; found 408.26610.

**Representative Procedure for Racemic Addition of Cyclohexyl Meldrum's Acid to *trans*- $\beta$ -Nitrostyrene.** To a solution of *trans*- $\beta$ -nitrostyrene (15 mg, 0.10 mmol) in dichloromethane (1.0 mL) was added a few drops of triethylamine. Cyclohexyl Meldrum's acid (36 mg, 0.20 mmol) was added, and the reaction mixture was stirred for 18 h. The triethylamine was then removed by eluting the reaction mixture through a plug of silica gel with dichloromethane.

**Representative Procedure for Enantio- and Diastereoselective Addition of Cyclohexyl Meldrum's Acid to *trans*- $\beta$ -Nitrostyrenes.** A mixture of *trans*- $\beta$ -nitrostyrene (45 mg, 0.30 mmol) and sulfinyl urea catalyst *ent*-**8** (1.4 mg, 0.003 mmol) was dissolved in cyclopentyl methyl ether (1.0 mL). Cyclohexyl Meldrum's acid (83 mg, 0.45 mmol) was added. The reaction mixture was stirred at room temperature for 24 h, then eluted through a plug of silica with dichloromethane to remove the catalyst and then concentrated *in vacuo*. The crude product was purified by silica gel chromatography.

Enantiomeric excess was determined by chiral HPLC analysis.

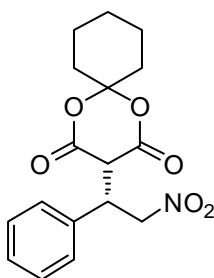

**12a:** (*R*)-3-(2-Nitro-1-phenylethyl)-1,5-dioxaspiro[5.5]undecane-2,4-dione: 95 mg (95% yield) of a viscous colorless oil was isolated

by flash column chromatography using 80:19:1 hexanes:EA:AcOH as eluent: 98% ee (Chiralcel IA, 90 (1% TFA):10 hexanes:IPA, 1 mL/min, 210 nm,  $t_R$  (minor) = 12.2 min,  $t_R$  (major) = 13.5 min)  $[\alpha]_D^{20} = -8.5$  ( $c$  1.0,  $\text{CHCl}_3$ ): IR (neat): 2943, 1778, 1737, 1551, 1496, 1453, 1368, 1299, 1265, 1064, 986, 853  $\text{cm}^{-1}$ .  $^1\text{H}$  NMR (400 MHz,  $\text{CDCl}_3$ )  $\delta$  7.41 – 7.31 (m, 5H), 5.45 (dd,  $J = 14.0, 9.1$  Hz, 1H), 5.04 (dd,  $J = 14.0, 6.5$  Hz, 1H), 4.68 (ddd,  $J = 9.1, 6.5, 3.1$  Hz, 1H), 4.05 (d,  $J = 3.1$  Hz, 1H), 1.96 – 1.87 (m, 2H), 1.74 – 1.66 (m, 2H), 1.60 (m, 2H), 1.54 – 1.40 (m, 4H).  $^{13}\text{C}$  NMR (126 MHz,  $\text{CDCl}_3$ )  $\delta$  164.53, 164.05, 135.19, 129.20, 128.92, 128.80, 106.71, 76.02, 48.89, 41.98, 36.82, 36.64, 23.81, 22.29, 21.70. HRMS-ESI ( $m/z$ ):  $[\text{M}+\text{H}]^+$  calcd for  $\text{C}_{17}\text{H}_{19}\text{NO}_6$ , 334.12851; found, 334.12830.

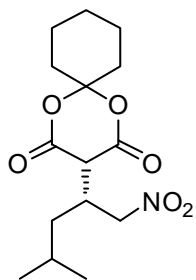

**12b: (R)-3-(4-Methyl-1-nitropentan-2-yl)-1,5-**

**dioxaspiro[5.5]undecane-2,4-dione:** 85 mg (90% yield) of a viscous colorless oil was isolated by flash column chromatography using 80:19:1 hexanes:EA:AcOH as eluent: 94% ee (Chiralcel IA, 90 (1%

TFA):10 hexanes:IPA, 1 mL/min, 210 nm,  $t_R$  (minor) = 7.6 min,  $t_R$  (major) = 7.2 min)  $[\alpha]_D^{20} = -1.3$  ( $c$  1.0,  $\text{CHCl}_3$ ): IR (neat): 2956, 2871, 1778, 1739, 1550, 1466, 1452, 1369, 1307, 1274, 1064, 981, 853  $\text{cm}^{-1}$ .  $^1\text{H}$  NMR (500 MHz,  $\text{CDCl}_3$ )  $\delta$  4.93 (dd,  $J = 13.3, 10.3$  Hz, 1H), 4.46 (dd,  $J = 13.3, 4.2$  Hz, 1H), 3.83 (d,  $J = 2.5$  Hz, 1H), 3.33 – 3.19 (m, 1H), 1.91 (m, 4H), 1.76 – 1.68 (m, 2H), 1.67 – 1.60 (m, 2H), 1.57 – 1.42 (m, 4H), 1.17 – 1.10 (m, 1H), 0.91 (d,  $J = 6.5$  Hz, 3H), 0.87 (d,  $J = 6.5$  Hz, 3H).  $^{13}\text{C}$  NMR (126 MHz,  $\text{CDCl}_3$ )  $\delta$  164.19, 163.95, 106.34, 75.77, 47.32, 38.11, 36.61, 36.05, 34.45, 25.64, 23.98, 23.13, 22.59, 21.66, 21.42. HRMS-ESI ( $m/z$ ):  $[\text{M}+\text{H}]^+$  calcd for  $\text{C}_{15}\text{H}_{23}\text{NO}_6$ , 314.15981; found, 314.15973.



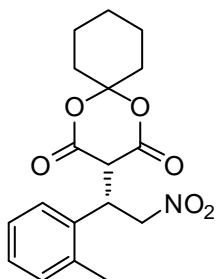

**12c: (R)-3-(-2-Nitro-1-o-tolyylethyl)-1,5-dioxaspiro[5.5]undecane-**

**2,4-dione:** 98 mg (94% yield) of a colorless oil was isolated by flash

column chromatography using 70:30:1 hexanes:CPME:AcOH as

eluent: 96% ee (Chiralcel IA, 90 (1% TFA):10 hexanes:IPA, 1

mL/min, 210 nm,  $t_R$  (minor) = 11.3 min,  $t_R$  (major) = 13.7 min)  $[\alpha]_D^{20}$

= -88.9 (*c* 0.44, CHCl<sub>3</sub>): IR (neat): 3023, 2944, 1775, 1738, 1552, 1493, 1452, 1368,

1304, 1272, 1065, 985, 853 cm<sup>-1</sup>. <sup>1</sup>H NMR (500 MHz, CDCl<sub>3</sub>) δ 7.42 – 7.36 (m, 1H),

7.20 – 7.13 (m, 3H), 5.28 (dd, *J* = 13.7, 9.0 Hz, 1H), 4.96 – 4.89 (ddd, *J* = 9.0, 6.6, 3.1

Hz, 1H), 4.83 (dd, *J* = 13.7, 6.6 Hz, 1H), 3.90 (d, *J* = 3.1 Hz, 1H), 2.43 (s, 3H), 1.93 –

1.85 (m, 2H), 1.71 – 1.57 (m, 6H), 1.43 (m, 2H). <sup>13</sup>C NMR (126 MHz, CDCl<sub>3</sub>) δ 165.16,

164.22, 137.05, 134.97, 131.66, 128.70, 127.24, 127.19, 106.94, 75.61, 48.66, 37.09,

37.06, 36.74, 24.10, 22.58, 21.98, 19.79. HRMS-ESI (*m/z*): [M+H]<sup>+</sup> calcd for

C<sub>18</sub>H<sub>21</sub>NO<sub>6</sub>, 348.14416; found, 348.14433.

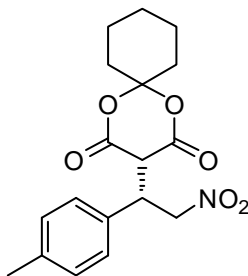

**12d: (R)-3-(2-Nitro-1-p-tolyylethyl)-1,5-dioxaspiro[5.5]un**

**decane-2,4-dione:** 103 mg (99% yield) of a viscous colorless oil

was isolated by flash column chromatography using 70:30:1

hexanes:CPME:AcOH as eluent: 98% ee (Chiralcel IA, 90 (1%

TFA):10 hexanes:IPA, 1 mL/min, 210 nm,  $t_R$  (minor) = 12.0 min,  $t_R$  (major) = 13.9 min)

$[\alpha]_D^{20}$  = -19.4 (*c* 0.77, CHCl<sub>3</sub>): IR (neat): 2945, 1776, 1738, 1552, 1516, 1452, 1368,

1300, 1272, 1068, 988, 853 cm<sup>-1</sup>. <sup>1</sup>H NMR (400 MHz, CDCl<sub>3</sub>) δ 7.15 (d, *J* = 8.0 Hz, 2H),

7.06 (d, *J* = 8.0 Hz, 2H), 5.32 (dd, *J* = 13.9, 9.0 Hz, 1H), 4.92 (dd, *J* = 13.9, 6.6 Hz, 1H),

4.53 (ddd, *J* = 9.0, 6.6, 3.1 Hz, 1H), 3.94 (d, *J* = 3.1 Hz, 1H), 2.24 (s, 3H), 1.86 – 1.77

(m, 2H), 1.64 – 1.30 (m, 8H). <sup>13</sup>C NMR (126 MHz, CDCl<sub>3</sub>) δ 165.04, 164.58, 139.10,

132.55, 130.23, 129.21, 107.09, 76.65, 49.41, 42.11, 37.24, 37.05, 24.27, 22.73, 22.15, 21.45. HRMS-ESI (m/z): [M+H]<sup>+</sup> calcd for C<sub>18</sub>H<sub>21</sub>NO<sub>6</sub>, 348.14416; found, 348.14317.

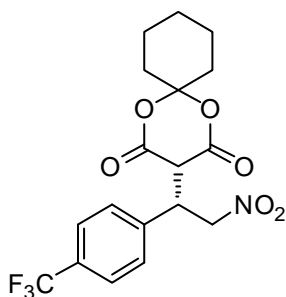

**12e: (R)-3-(2-Nitro-1-(4-(trifluoromethyl)phenyl)ethyl)-1,5-dioxaspiro[5.5]undecane-2,4-dione:** 99 mg (82% yield) of a viscous colorless oil was isolated by flash column chromatography using 50:50:1 hexanes:DCM:AcOH as eluent: 98% ee (Chiralcel IA, 92 (1% TFA):8 hexanes:EtOH, 1 mL/min,

210 nm,  $t_R$  (minor) = 14.3 min,  $t_R$  (major) = 18.2 min)  $[\alpha]_D^{20} = -13.0$  ( $c$  0.93, CHCl<sub>3</sub>): IR (neat): 3024, 2949, 1779, 1740, 1622, 1555, 1453, 1369, 1324, 1275, 1069, 1001, 844 cm<sup>-1</sup>. <sup>1</sup>H NMR (500 MHz, CDCl<sub>3</sub>)  $\delta$  7.42 – 7.36 (d,  $J$  = 8.0 Hz, 2H), 7.20 – 7.13 (d,  $J$  = 8.0 Hz, 2H), 5.29 (dd,  $J$  = 13.7, 9.0 Hz, 1H), 5.00 (dd,  $J$  = 13.7, 6.6 Hz, 1H), 4.65 (ddd,  $J$  = 9.0, 6.6, 3.1 Hz, 1H), 4.03 (d,  $J$  = 3.1 Hz, 1H), 1.87 – 1.84 (m, 2H), 1.61 – 1.59 (m, 6H), 1.39-1.38 (m, 2H). <sup>13</sup>C NMR (126 MHz, CDCl<sub>3</sub>)  $\delta$  164.16, 163.59, 139.19, 130.94 (dd,  $J$  = 65.3, 32.5 Hz), 129.69, 126.00 (q,  $J$  = 3.7 Hz), 123.69 (q,  $J$  = 272.4 Hz), 106.91, 75.71, 48.84, 41.25, 36.59, 36.36, 23.78, 22.38, 21.60. HRMS-ESI (m/z): [M+H]<sup>+</sup> calcd for C<sub>18</sub>H<sub>18</sub>F<sub>3</sub>NO<sub>6</sub>, 402.11590; found, 402.11613.

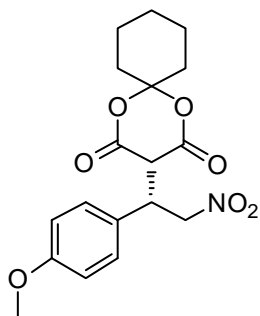

**12f: (R)-3-(1-(4-Methoxyphenyl)-2-nitroethyl)-1,5-dioxaspiro[5.5]undecane-2,4-dione:** 108 mg (99% yield) of a viscous colorless oil was isolated by flash column chromatography using 50:50:1 hexanes:DCM:AcOH as eluent: 96% ee (Chiralcel IA, 90 (1% TFA):10 hexanes:IPA, 1 mL/min, 210 nm,  $t_R$  (minor) =

16.7 min,  $t_R$  (major) = 18.7 min)  $[\alpha]_D^{20} = -20.6$  ( $c$  0.73, CHCl<sub>3</sub>): IR (neat): 2959, 1781, 1736, 1553, 1514, 1452, 1368, 1300, 1251, 1068, 986, 834 cm<sup>-1</sup>. <sup>1</sup>H NMR (400 MHz,

CDCl<sub>3</sub>)  $\delta$  7.28 (d,  $J$  = 8.7 Hz, 2H), 6.85 (d,  $J$  = 8.7 Hz, 2H), 5.38 (dd,  $J$  = 13.9, 8.8 Hz, 1H), 5.02 (dd,  $J$  = 13.9, 6.8 Hz, 1H), 4.67 – 4.54 (ddd,  $J$  = 8.8, 6.8, 3.1 Hz, 1H), 4.03 (d,  $J$  = 3.1 Hz, 1H), 3.79 (s, 3H), 1.96 – 1.84 (m, 2H), 1.71 – 1.40 (m, 8H). <sup>13</sup>C NMR (126 MHz, CDCl<sub>3</sub>)  $\delta$  165.06, 164.63, 160.19, 130.61, 127.38, 114.87, 107.07, 76.84, 55.68, 49.49, 41.85, 37.23, 37.09, 24.26, 22.73, 22.15. HRMS-ESI ( $m/z$ ): [M+H]<sup>+</sup> calcd for C<sub>18</sub>H<sub>21</sub>NO<sub>7</sub>, 364.13908; found, 364.13880.

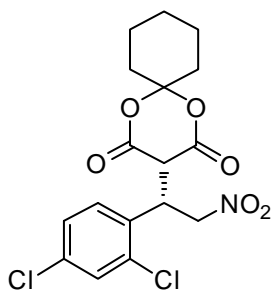

**12g: (R)-3-(1-(2,4-Dichlorophenyl)-2-nitroethyl)-1,5-dioxaspiro[5.5]undecane-2,4-dione:** 114 mg (95% yield) of a

viscous colorless oil was isolated by flash column chromatography using 50:50:1 hexanes:DCM:AcOH as eluent:

96% ee (Chiralcel IA, 90 (1% TFA):10 hexanes:IPA, 1 mL/min, 210 nm,  $t_R$  (minor) =

12.6 min,  $t_R$  (major) = 15.5 min) [ $\alpha$ ]<sub>D</sub><sup>20</sup> = -2.5 ( $c$  0.73, CHCl<sub>3</sub>): IR (neat): 2944, 1784,

1739, 1553, 1475, 1452, 1368, 1302, 1274, 1063, 974, 852 cm<sup>-1</sup>. <sup>1</sup>H NMR (400 MHz,

CDCl<sub>3</sub>)  $\delta$  7.50 (d,  $J$  = 8.5 Hz, 1H), 7.44 (d,  $J$  = 2.2 Hz, 1H), 7.26 (dd,  $J$  = 8.5, 2.2 Hz,

1H), 5.12 – 5.05 (td,  $J$  = 7.4, 2.8 Hz, 1H), 5.00 (d,  $J$  = 7.4 Hz, 2H), 4.06 (d,  $J$  = 2.8 Hz,

1H), 1.95 (m, 4H), 1.80 – 1.71 (m, 2H), 1.66 (m, 2H), 1.53 – 1.43 (m, 2H). <sup>13</sup>C NMR

(126 MHz, CDCl<sub>3</sub>)  $\delta$  163.90, 163.40, 135.39, 135.11, 132.94, 130.48, 130.37, 128.25,

107.32, 73.53, 48.35, 37.23, 36.79, 36.03, 24.37, 23.02, 22.15. HRMS-ESI ( $m/z$ ):

[M+H]<sup>+</sup> calcd for C<sub>17</sub>H<sub>17</sub>Cl<sub>2</sub>NO<sub>6</sub>, 402.05057; found, 402.05040.

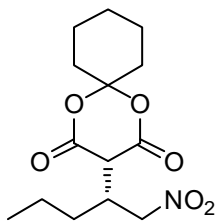

**12h: (R)-3-(1-Nitropentan-2-yl)-1,5-dioxaspiro[5.5]undecane-2,4-dione:** 84 mg (94% yield) of a viscous colorless oil was isolated

by flash column chromatography using 80:19:1 hexanes:EA:AcOH as

eluent: 94% ee (Chiralcel IA, 92 (1% TFA):8 hexanes:EtOH, 1

mL/min, 210 nm,  $t_R$  (minor) = 11.4 min,  $t_R$  (major) = 13.5 min)  $[\alpha]_D^{20} = +11.2$  ( $c$  0.50,  $\text{CHCl}_3$ ): IR (neat): 2945, 2874, 1780, 1739, 1551, 1453, 1369, 1305, 1274, 1066, 976, 854  $\text{cm}^{-1}$ .  $^1\text{H}$  NMR (400 MHz,  $\text{CDCl}_3$ )  $\delta$  4.99 (dd,  $J = 13.4, 10.0$  Hz, 1H), 4.58 (dd,  $J = 13.4, 4.5$  Hz, 1H), 3.93 (d,  $J = 2.5$  Hz, 1H), 3.30 (tddd,  $J = 12.2, 10.0, 4.5, 2.5$  Hz, 1H), 2.09 – 1.93 (m, 4H), 1.80 (dt,  $J = 12.2, 6.3$  Hz, 2H), 1.77 – 1.66 (m, 2H), 1.64 – 1.33 (m, 6H), 0.96 (t,  $J = 7.0$  Hz, 3H).  $^{13}\text{C}$  NMR (126 MHz,  $\text{CDCl}_3$ )  $\delta$  164.56, 106.79, 76.38, 47.60, 37.06, 36.70, 36.42, 31.83, 24.41, 23.01, 22.11, 20.98, 14.14. HRMS-ESI ( $m/z$ ):  $[\text{M}+\text{H}]^+$  calcd for  $\text{C}_{14}\text{H}_{21}\text{NO}_6$ , 300.14416; found, 300.14400.

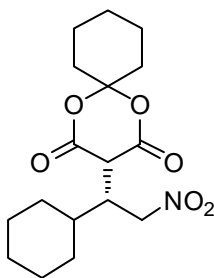

**12i: (R)-3-(1-Cyclohexyl-2-nitroethyl)-1,5-**

**dioxaspiro[5.5]undecane-2,4-dione:** 74 mg (73% yield) of a viscous

colorless oil was isolated by flash column chromatography using

80:19:1 hexanes:EA:AcOH as eluent: 96% ee (Chiralcel IA, 90 (1%

TFA):10 hexanes:IPA, 1 mL/min, 210 nm,  $t_R$  (minor) = 7.8 min,  $t_R$  (major) = 8.2 min)

$[\alpha]_D^{20} = -0.6$  ( $c$  0.48,  $\text{CHCl}_3$ ): IR (neat): 2928, 2855, 1780, 1740, 1552, 1451, 1369,

1305, 1265, 1067, 963, 853  $\text{cm}^{-1}$ .  $^1\text{H}$  NMR (400 MHz,  $\text{CDCl}_3$ )  $\delta$  4.92 (dd,  $J = 13.2, 10.2$

Hz, 1H), 4.67 (dd,  $J = 13.2, 3.8$  Hz, 1H), 3.85 (d,  $J = 2.1$  Hz, 1H), 3.24 – 3.12 (m, 1H),

2.08 – 1.95 (m, 4H), 1.82 (m, 4H), 1.78 – 1.62 (m, 5H), 1.55 (m, 2H), 1.47 (m, 1H), 1.25

– 1.05 (m, 5H).  $^{13}\text{C}$  NMR (126 MHz,  $\text{CDCl}_3$ )  $\delta$  164.61, 106.35, 75.75, 45.37, 41.90,

37.74, 36.56, 36.15, 31.33, 30.87, 26.29, 26.04, 25.81, 23.99, 22.57, 21.68. HRMS-ESI

( $m/z$ ):  $[\text{M}+\text{H}]^+$  calcd for  $\text{C}_{17}\text{H}_{25}\text{NO}_6$ , 340.17546; found, 340.17550.

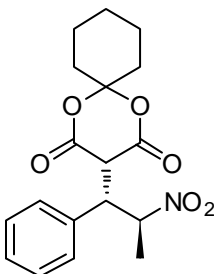

**14a: 3-((1R,2S)-(2-Nitro-1-phenylpropyl))-1,5-**

**dioxaspiro[5.5]undecane-2,4-dione:** 94 mg (90% yield) of a single

diastereomer, crude dr = 97:3, was isolated as a white solid, mp= 111 °C, by flash column chromatography using 80:19:1 hexanes:EA:AcOH as eluent: 93% ee (Chiralcel IA, 92 (1% TFA):8 hexanes:EtOH, 1 mL/min, 210 nm,  $t_R$  (minor) = 12.4 min,  $t_R$  (major) = 10.6 min)  $[\alpha]_D^{20} = +22.1$  ( $c$  0.53,  $\text{CHCl}_3$ ): IR (neat): 3021, 2946, 2870, 1776, 1741, 1549, 1497, 1452, 1368, 1297, 1274, 1070, 998, 853  $\text{cm}^{-1}$ .  $^1\text{H}$  NMR (400 MHz,  $\text{CDCl}_3$ )  $\delta$  7.36 (s, 5H), 5.90 (dq,  $J = 13.4, 6.7$  Hz, 1H), 4.28 (dd,  $J = 11.6, 3.0$  Hz, 1H), 3.81 (d,  $J = 3.1$  Hz, 1H), 1.92 – 1.78 (m, 2H), 1.71 – 1.63 (m, 2H), 1.62 – 1.55 (m, 2H), 1.47-1.42 (m, 4H), 1.44 (d,  $J = 6.7$  Hz, 3H).  $^{13}\text{C}$  NMR (126 MHz,  $\text{CDCl}_3$ )  $\delta$  164.51, 164.19, 134.91, 129.74, 129.25, 128.75, 106.45, 83.31, 48.85, 48.53, 36.79, 36.69, 23.81, 22.25, 21.67, 19.31. HRMS-ESI ( $m/z$ ):  $[\text{M}+\text{H}]^+$  calcd for  $\text{C}_{18}\text{H}_{21}\text{NO}_6$ , 348.14416; found, 348.14377.

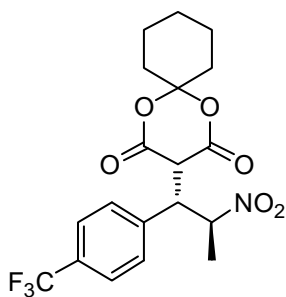

**14b: 3-((1R,2S)-2-Nitro-1-(4-trifluoromethylphenyl)propyl)-1,5-dioxaspiro[5.5]undecane-2,4-dione:** 88 mg (71% yield) of a single diastereomer, crude dr = 95:5, was isolated as a white solid, mp 66-67 °C, by flash column chromatography using 80:19:1 hexanes:EA:AcOH as eluent: 94% ee (Chiralcel IA, 92

(1% TFA):8 hexanes:EtOH, 1 mL/min, 210 nm,  $t_R$  (minor) = 11.8 min,  $t_R$  (major) = 12.9 min)  $[\alpha]_D^{20} = -4.0$  ( $c$  1.0,  $\text{CHCl}_3$ ): IR (neat): 3024, 2947, 1777, 1742, 1621, 1552, 1453, 1369, 1325, 1276, 1069, 1001, 846  $\text{cm}^{-1}$ .  $^1\text{H}$  NMR (400 MHz,  $\text{CDCl}_3$ )  $\delta$  7.64 (d,  $J = 8.3$  Hz, 2H), 7.57 (d,  $J = 8.3$  Hz, 2H), 5.93 (dq,  $J = 11.5, 6.7$  Hz, 1H), 4.35 (dd,  $J = 11.5, 3.0$  Hz, 1H), 3.85 (d,  $J = 3.0$  Hz, 1H), 1.98 – 1.84 (m, 2H), 1.67 (m, 6H), 1.55 – 1.42 (m, 2H), 1.44 (d,  $J = 6.7$  Hz, 3H).  $^{13}\text{C}$  NMR (126 MHz,  $\text{CDCl}_3$ )  $\delta$  164.59, 164.13, 139.39, 131.42 (dd,  $J = 65.6, 32.9$  Hz), 130.96, 126.52 (q,  $J = 3.5$  Hz), 124.11 (q,  $J = 271.9$  Hz),

107.07, 83.35, 48.77, 48.65, 37.00, 36.93, 24.24, 22.79, 22.02, 19.69. HRMS-ESI (m/z):  
[M+H]<sup>+</sup> calcd for C<sub>19</sub>H<sub>20</sub>F<sub>3</sub>NO<sub>6</sub>, 416.13155; found, 416.13137.

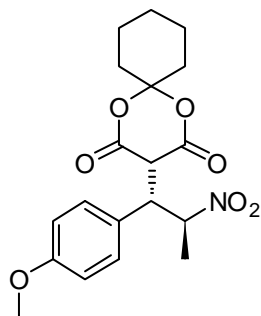

**14c: 3-((1R,2S)-(1-(4-methoxyphenyl)-2-nitropropyl)-1,5-dioxaspiro[5.5]undecane-2,4-dione:** 103 mg (91% yield) of a single diastereomer, crude dr = 96:4, was isolated as a pale yellow solid, mp 124-125 °C, by flash column chromatography using 80:19:1 hexanes:EA:AcOH as eluent: 92% ee (Chiralcel IA, 92

(1% TFA):8 hexanes:EtOH, 1 mL/min, 210 nm, t<sub>R</sub> (minor) = 19.9 min, t<sub>R</sub> (major) = 14.1 min) [α]<sub>D</sub><sup>20</sup> = -11.9 (c 1.0, CHCl<sub>3</sub>): IR (neat): 2945, 1776, 1741, 1610, 1549, 1513, 1452, 1368, 1296, 1265, 1070, 998, 835 cm<sup>-1</sup>. <sup>1</sup>H NMR (400 MHz, CDCl<sub>3</sub>) δ 7.28 – 7.14 (dt, J = 8.5, 3.5 Hz, 2H), 6.87 – 6.74 (dt, J = 8.5, 3.5 Hz, 2H), 5.80 (dq, J = 11.7, 6.7 Hz, 1H), 4.16 (dd, J = 11.5, 3.1 Hz, 1H), 3.75 (s, 3H), 3.73 (d, J = 3.1 Hz, 1H), 1.86 – 1.73 (m, 2H), 1.60 (m, 2H), 1.54 (m, 2H), 1.46 (m, 2H), 1.43 – 1.36 (m, 2H), 1.36 (d, J = 6.7 Hz, 3H). <sup>13</sup>C NMR (126 MHz, CDCl<sub>3</sub>) δ 164.58, 164.30, 159.69, 130.94, 126.53, 114.50, 106.38, 83.59, 55.23, 48.56, 48.19, 36.82, 36.65, 23.82, 22.27, 21.67, 19.32. HRMS-ESI (m/z): [M+H]<sup>+</sup> calcd for C<sub>19</sub>H<sub>23</sub>NO<sub>7</sub>, 378.15473; found, 378.15460.

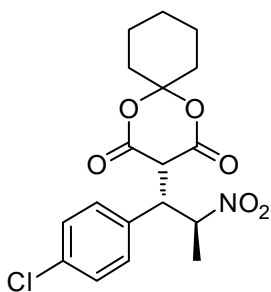

**14d: 3-((1R,2S)-(1-(4-chlorophenyl)-2-nitropropyl)-1,5-dioxaspiro[5.5]undecane-2,4-dione:** 87 mg (77% yield) of a single diastereomer, crude dr = 96:4, was isolated as a white solid, mp 123-124 °C, by flash column chromatography using 80:19:1 hexanes:EA:AcOH as eluent: 91% ee (Chiralcel IA, 92 (1%

(1% TFA):8 hexanes:EtOH, 0.8 mL/min, 210 nm, t<sub>R</sub> (minor) = 18.4 min, t<sub>R</sub> (major) = 16.3 min) [α]<sub>D</sub><sup>20</sup> = -13.5 (c 2.0, CHCl<sub>3</sub>): IR (neat): 2943, 2868, 1778, 1742, 1551, 1493, 1452,

1368, 1299, 1275, 1071  $\text{cm}^{-1}$ .  $^1\text{H}$  NMR (400 MHz,  $\text{CDCl}_3$ )  $\delta$  7.29 (m, 4H), 5.82 (dq,  $J = 11.6, 6.7$  Hz, 1H), 4.20 (dd,  $J = 11.5, 3.1$  Hz, 1H), 3.76 (d,  $J = 3.1$  Hz, 1H), 1.88 – 1.78 (m, 2H), 1.62 (m, 6H), 1.39 (m, 2H), 1.38 (d,  $J = 6.7$  Hz, 3H).  $^{13}\text{C}$  NMR (126 MHz,  $\text{CDCl}_3$ )  $\delta$  164.28, 163.87, 134.81, 133.31, 131.34, 129.36, 106.50, 83.15, 48.37, 48.01, 36.65, 36.54, 23.82, 22.34, 21.61, 19.26. HRMS-ESI ( $m/z$ ):  $[\text{M}+\text{H}]^+$  calcd for  $\text{C}_{18}\text{H}_{20}\text{ClNO}_6$ , 382.10519; found, 382.10497.

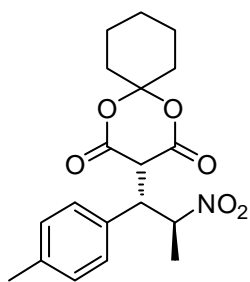

**14e:** **3-((1R,2S)-1-(4-methylphenyl)-2-nitropropyl)-1,5-dioxaspiro[5.5]undecane-2,4-dione:** 98 mg (91% yield) of a single diastereomer, crude dr = 97:3, was isolated as a white solid, mp 142-143  $^{\circ}\text{C}$ , by flash column chromatography using 80:19:1

hexanes:EA:AcOH as eluent: 92% ee (Chiralcel IA, 92 (1% TFA):8 hexanes:EtOH, 0.8 mL/min, 210 nm,  $t_{\text{R}}$  (minor) = 14.7 min,  $t_{\text{R}}$  (major) = 13.0 min)  $[\alpha]_{\text{D}}^{20} = -12.4$  ( $c$  2.0,  $\text{CHCl}_3$ ): IR (neat): 2942, 2867, 1777, 1742, 1549, 1515, 1452, 1368, 1298, 1274, 1069  $\text{cm}^{-1}$ .  $^1\text{H}$  NMR (400 MHz,  $\text{CDCl}_3$ )  $\delta$  7.19 (d,  $J = 8.0$  Hz, 2H), 7.10 (d,  $J = 8.0$  Hz, 2H), 5.83 (dq,  $J = 11.6, 6.7$  Hz, 1H), 4.18 (dd,  $J = 11.6, 3.1$  Hz, 1H), 3.73 (d,  $J = 3.1$  Hz, 1H), 2.29 (s, 3H), 1.85 – 1.77 (m, 2H), 1.61 (m, 2H), 1.55 (m, 2H), 1.46 – 1.37 (m, 4H), 1.38 (d,  $J = 6.7$  Hz, 3H).  $^{13}\text{C}$  NMR (126 MHz,  $\text{CDCl}_3$ )  $\delta$  164.55, 164.24, 138.60, 131.77, 129.86, 129.59, 106.36, 83.44, 48.56, 36.79, 36.68, 23.82, 22.25, 21.68, 20.98, 19.29. HRMS-ESI ( $m/z$ ):  $[\text{M}+\text{H}]^+$  calcd for  $\text{C}_{19}\text{H}_{23}\text{NO}_6$ , 362.15981; found, 362.16030.

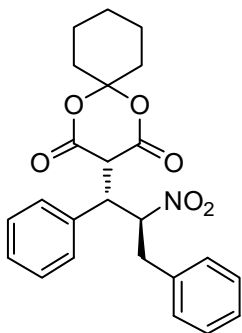

**14f:** **3-((1R,2S)-3-Phenyl-2-nitro-1-phenylpropyl)-1,5-dioxaspiro[5.5]undecane-2,4-dione:** 94 mg (74% yield) of a single diastereomer, crude dr = 98:2, was isolated as a white solid, mp 123-124  $^{\circ}\text{C}$ , by flash column chromatography using 80:19:1

hexanes:EA:AcOH as eluent: 90% ee (Chiralcel IA, 92 (1% TFA):8 hexanes:EtOH, 1 mL/min, 210 nm,  $t_R$  (minor) = 14.7 min,  $t_R$  (major) = 13.8 min)  $[\alpha]_D^{20} = -18.3$  ( $c$  0.82,  $\text{CHCl}_3$ ): IR (neat): 3026, 2943, 1778, 1743, 1552, 1495, 1455, 1368, 1299, 1267, 1072, 993, 859  $\text{cm}^{-1}$ .  $^1\text{H}$  NMR (400 MHz,  $\text{CDCl}_3$ )  $\delta$  7.47 – 7.31 (m, 5H), 7.26 (d,  $J = 3.0$  Hz, 1H), 7.23 – 7.16 (m, 2H), 7.07 – 6.92 (m, 2H), 6.02 (ddd,  $J = 11.8, 9.6, 4.1$  Hz, 1H), 4.35 (dd,  $J = 11.8, 3.1$  Hz, 1H), 3.66 (d,  $J = 3.1$  Hz, 1H), 3.04 – 2.84 (m, 2H), 1.86 – 1.74 (m, 2H), 1.61 (m, 2H), 1.55 – 1.48 (m, 2H), 1.44 – 1.31 (m, 4H).  $^{13}\text{C}$  NMR (126 MHz,  $\text{CDCl}_3$ )  $\delta$  164.56, 135.45, 134.81, 130.42, 129.88, 129.43, 129.16, 129.09, 127.95, 106.95, 90.76, 77.22, 48.98, 48.49, 39.44, 37.21, 24.23, 22.67, 22.11. HRMS-ESI ( $m/z$ ):  $[\text{M}+\text{H}]^+$  calcd for  $\text{C}_{24}\text{H}_{25}\text{NO}_6$ , 424.17546; found, 424.17557.

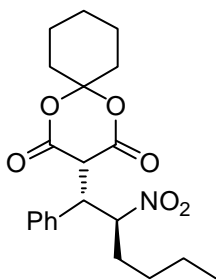

**14g: 3-((1R,2S)-(2-Nitro-1-phenylhexyl)-1,5-dioxaspiro[5.5]undecane-2,4-dione:** 82 mg (70% yield) of a single diastereomer, crude dr = 99:1, was isolated as a white solid, mp 95-96 °C, by flash column chromatography using 80:19:1 hexanes:EA:AcOH as eluent: 83% ee (Chiralcel IA, 92 (1% TFA):8

hexanes:EtOH, 1 mL/min, 210 nm,  $t_R$  (minor) = 8.4 min,  $t_R$  (major) = 8.0 min)  $[\alpha]_D^{20} = -12.2$  ( $c$  0.59,  $\text{CHCl}_3$ ): IR (neat): 2959, 2873, 1777, 1745, 1550, 1496, 1453, 1368, 1299, 1264, 1077, 992, 853  $\text{cm}^{-1}$ .  $^1\text{H}$  NMR (400 MHz,  $\text{CDCl}_3$ )  $\delta$  7.34 (s, 5H), 5.82 (ddd,  $J = 11.7, 10.4, 3.0$  Hz, 1H), 4.31 (dd,  $J = 11.7, 3.2$  Hz, 1H), 3.67 (d,  $J = 3.2$  Hz, 1H), 1.83 (m, 2H), 1.76 (m, 1H), 1.66 (m, 2H), 1.56 (m, 3H), 1.41 (m, 4H), 1.34 – 1.25 (m, 3H), 1.24 – 1.14 (m, 1H), 0.81 (t,  $J = 7.0$  Hz, 3H).  $^{13}\text{C}$  NMR (126 MHz,  $\text{CDCl}_3$ )  $\delta$  164.33, 164.21, 134.56, 129.76, 129.24, 128.77, 106.44, 88.76, 48.49, 48.15, 36.91, 36.70, 32.48, 27.41,



23.79, 22.21, 21.75, 21.66, 13.56. HRMS-ESI (m/z):  $[M+H]^+$  calcd for  $C_{21}H_{27}NO_6$ , 390.19111; found, 390.19107.

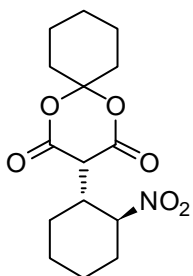

**14h: 3-((1R,2S)-(2-Nitrocyclohexyl)-1,5-dioxaspiro[5.5]undecane-2,4-dione:** 73 mg (78% yield) of a single diastereomer, crude dr = 87:13, was isolated as a white solid, mp 149 °C, by flash column chromatography using 80:19:1 hexanes:EA:AcOH as eluent: 91% ee (Chiralcel IA, 90 (1% TFA):10 hexanes:IPA, 1 mL/min, 210 nm,  $t_R$  (minor) = 8.9 min,  $t_R$  (major) = 9.9 min)  $[\alpha]_D^{20} = -15.4$  (c 0.57,  $CHCl_3$ ): IR (neat): 2946, 2867, 1778, 1743, 1547, 1453, 1369, 1295, 1265, 1056, 1000, 850  $cm^{-1}$ .  $^1H$  NMR (400 MHz,  $CDCl_3$ )  $\delta$  5.22 (td,  $J = 11.6, 4.0$  Hz, 1H), 3.59 (d,  $J = 2.5$  Hz, 1H), 3.10 – 2.89 (tdd,  $J = 11.6, 4.0, 2.5$  Hz, 1H), 2.47 – 2.29 (m, 1H), 1.99 – 1.83 (m, 6H), 1.83-1.74 (m, 4H), 1.72 – 1.65 (m, 2H), 1.64-1.56 (m, 1H), 1.53-1.46 (m, 2H), 1.44-1.33 (m, 2H).  $^{13}C$  NMR (126 MHz,  $CDCl_3$ )  $\delta$  164.14, 163.82, 106.20, 85.75, 47.02, 40.40, 36.61, 35.98, 32.04, 26.60, 24.78, 24.13, 23.96, 22.52, 21.67. HRMS-ESI (m/z):  $[M+H]^+$  calcd for  $C_{15}H_{21}NO_6$ , 312.14416; found, 312.14390.

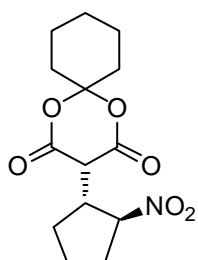

**14i: 3-((1R,2S)-(2-Nitrocyclopentyl)-1,5-dioxaspiro[5.5]undecane-2,4-dione:** 46 mg (52% yield) of a single diastereomer, crude dr = 90:10, was isolated as a white solid, mp 148 °C, by flash column chromatography using 80:19:1 hexanes:EA:AcOH as eluent: 97% ee (Chiralcel IA, 90 (1% TFA):10 hexanes:IPA, 1 mL/min, 210 nm,  $t_R$  (minor) = 8.8 min,  $t_R$  (major) = 10.1 min)  $[\alpha]_D^{20} = +21.3$  (c 0.69,  $CHCl_3$ ): IR (neat): 2946, 1782, 1742, 1644, 1546, 1452, 1369, 1307, 1265, 1064, 1001, 854  $cm^{-1}$ .  $^1H$  NMR (400 MHz,  $CDCl_3$ )  $\delta$  5.23 (td,  $J = 8.1, 5.3$  Hz, 1H), 4.10 (d,  $J = 3.1$  Hz, 1H), 3.27 (tdd,  $J = 8.1, 5.3, 3.1$  Hz, 1H),

2.38 – 2.19 (m, 2H), 2.04 (m, 1H), 2.01 – 1.95 (m, 2H), 1.94 – 1.87 (m, 2H), 1.86 – 1.76 (m, 2H), 1.72 (m, 2H), 1.65 (m, 2H), 1.45 (m, 3H).  $^{13}\text{C}$  NMR (126 MHz,  $\text{CDCl}_3$ )  $\delta$  164.55, 164.51, 106.86, 88.06, 47.96, 44.06, 37.21, 36.05, 31.72, 28.50, 24.42, 24.35, 23.04, 22.15. HRMS-ESI (m/z):  $[\text{M}+\text{H}]^+$  calcd for  $\text{C}_{14}\text{H}_{19}\text{NO}_6$ , 298.12851; found, 298.12850.

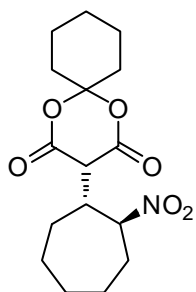

**14j:** 3-((1R,2S)-(2-Nitrocycloheptyl)-1,5-dioxaspiro[5.5]undecane-2,4-dione: 90 mg (92% yield) of a single diastereomer, crude dr = >99:1, was isolated as a white solid, mp 122 °C, by flash column chromatography using 80:19:1 hexanes:EA:AcOH as eluent: 98% ee (Chiralcel IA, 90 (1% TFA):10 hexanes:IPA, 1 mL/min, 210 nm,  $t_{\text{R}}$

(minor) = 8.5 min,  $t_{\text{R}}$  (major) = 9.0 min)  $[\alpha]_{\text{D}}^{20} = +20.0$  ( $c$  0.88,  $\text{CHCl}_3$ ): IR (neat): 2939, 2860, 1781, 1743, 1545, 1453, 1369, 1303, 1265, 1067, 974, 859  $\text{cm}^{-1}$ .  $^1\text{H}$  NMR (400 MHz,  $\text{CDCl}_3$ )  $\delta$  5.34 (td,  $J = 5.2, 4.8$  Hz, 1H), 3.72 (d,  $J = 2.4$  Hz, 1H), 3.30 (tdd,  $J = 11.2, 4.8, 2.4$  Hz, 1H), 2.50 – 2.28 (m, 1H), 2.25 – 2.08 (m, 1H), 1.99 – 1.63 (m, 13H), 1.64 – 1.46 (m, 3H), 1.46 – 1.30 (m, 2H).  $^{13}\text{C}$  NMR (126 MHz,  $\text{CDCl}_3$ )  $\delta$  164.30, 164.01, 106.26, 88.72, 49.70, 41.80, 36.68, 35.77, 32.63, 29.09, 28.72, 28.34, 23.98, 22.56, 21.67. HRMS-ESI (m/z):  $[\text{M}+\text{H}]^+$  calcd for  $\text{C}_{16}\text{H}_{23}\text{NO}_6$ , 326.15981; found, 326.15983.

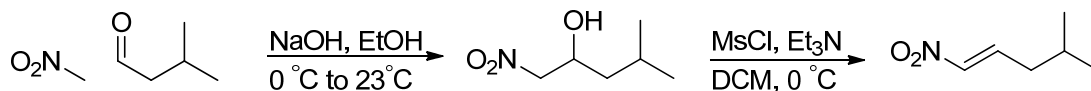

**Large scale synthesis of *trans*-1-nitro-4-methyl-pent-1-ene.** The following is a modified version of the procedure described by Bassas et al.<sup>7</sup> In a 3-L, 2 neck

roundbottom flask with 5 cm oval stirbar and an internal temperature probe was added isovaleraldehyde (241 mL, 2.25 mol), nitromethane (124 mL, 2.30 mol) and ethanol (1 L). The flask was then submerged in an ice-water bath and stirred until the temperature was 8 °C at which point the flask was fitted with an additional funnel and a 10 M solution of NaOH (90 g, 2.25 mol) was added dropwise such that the internal temperature remained between 10-15 °C. After ~150 mL of the NaOH solution had been added, a white slurry formed. Eventually the flask required swirling by hand for the remaining addition. Once the addition is complete the flask is allowed to warm to room temperature (12 h). The reaction is then quenched by the addition of AcOH (129 mL, 2.26 mol) all at once. The contents of the flask are transferred to a 6-L separatory funnel and the product is extracted with 4 L of Et<sub>2</sub>O. The Et<sub>2</sub>O layer is washed with H<sub>2</sub>O (4X ~500 mL) then washed with a saturated solution of NaHCO<sub>3</sub> (1 X 500 mL) and finally a brine solution (1 X 500 mL). The Et<sub>2</sub>O layer is then dried over magnesium sulfate and concentrated. The concentrated product was then placed on a Kugelrohr distillation apparatus and gently rocked and warmed (35-45 °C) for 3 h. This was found to be necessary to remove trace ethanol. The crude nitro alcohol, 4-methyl-1-nitropentan-2-ol, was sufficiently pure for the next step (290.32 g, 87.8%).

In a 5-L, 4 neck round bottom flask equipped with a mechanical stirrer, nitrogen inlet, stopper and addition funnel was placed the nitroalcohol (292.32 g, 1.97 mol), DCM (1.97 L) and MsCl (167.3 mL, 2.17 mol), and the flask was placed in an ice bath and allowed to stir for 20 min. Then Et<sub>3</sub>N (589 mL, 4.24 mol) was placed in the addition funnel and added over 1 h. The reaction becomes heterogeneous after ~2/3 of the amine has been added. The reaction was given an additional 30 minutes after all the Et<sub>3</sub>N had

been added. The reaction mixture is transferred to a 6-L separatory funnel and washed with H<sub>2</sub>O (2 X 1 L) then 1 M HCl (1 X 0.3 L) and dried over MgSO<sub>4</sub>. The solvent is removed *in vacuo* and then the crude nitroalkene is purified by short path distillation (85 °C, 5 mmHg) affording *trans*-1-nitro-4-methyl-pent-1-ene (213.82 g, 84%).

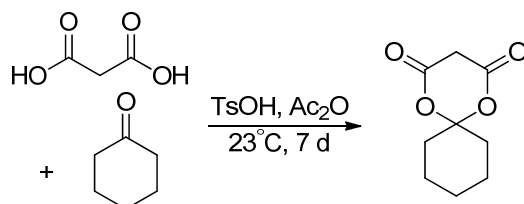

**Large scale synthesis of cyclohexyl Meldrum's acid.** In a procedure adapted from that of Velikorodov<sup>8</sup> a 3-L, 3 neck round bottom flask equipped with a 5 cm oval stir bar was fitted with rubber stoppers. Within the flask was placed malonic acid (500 g, 4.81 mol), TsOH·H<sub>2</sub>O (15.5 g, 0.0818 mol), cyclohexanone (497 mL, 4.81 mol) and then Ac<sub>2</sub>O (776 mL). The heterogeneous mixture was stirred until it became a homogenous black solution (~ 5 h), and then the stirring was discontinued. After 7 d, 2.38 L of H<sub>2</sub>O was added, and the resulting mixture was stirred until the product precipitated. The flask was moved to an ice bath and allowed to cool. Then the product was filtered on a Buchner funnel and washed with hot hexanes. The product was dried on the filter and then recrystallized using 5 mL/g of hot 5:2 hexanes: EtOH (200 proof). The crystals were then filtered and washed with hot hexanes to remove any remaining color to afford pure cyclohexyl Meldrum's acid (445 g, 50%). This procedure has been performed on 20 mol scale with similar results.

**Procedure for Large Scale Enantioselective Addition of Cyclohexyl Meldrum's Acid to *trans*-1-nitro-4-methyl-pent-1-ene.** To a 3-neck, 3-L Morton type round bottom flask equipped with stir bar (1.5 inch, oval) was added *trans*-1-nitro-4-

methyl-pent-1-ene (129 g, 1.00 mol), sulfinyl urea catalyst **8** (0.95 g, 2.00 mmol), cyclohexyl Meldrum's acid (368 g, 2.00 mol), and cyclopentyl methyl ether (0.83 L). The reaction flask was stoppered, and the heterogeneous reaction mixture was stirred at 35 °C (oil bath) for 48 h. The reaction mixture became homogeneous within ~1.5 h. The reaction progress was monitored by the disappearance of the nitroalkene by TLC ( $R_f$  = 0.8, 8:2 Hex:EA). Upon complete reaction conversion (48 h), the CPME was removed *in vacuo*, and the crude reaction mixture was diluted with 400 mL of toluene and then concentrated to remove trace CPME (dilution and concentration was repeated a 2<sup>nd</sup> time). The unpurified product was then used directly in the next step without further purification. A small sample of the product (< 5 mg) was taken aside for determination of enantiomeric excess: 92% ee (Chiralcel IA, 90 (1% TFA):10 hexanes:IPA, 1 mL/min, 210 nm,  $t_R$  (minor) = 7.2 min,  $t_R$  (major) = 7.6 min). By <sup>1</sup>H NMR analysis, the reaction was determined to have proceeded to complete conversion.

**Procedure for Large Scale One-Pot Hydrolysis and Decarboxylation of (*S*)-3-(4-methyl-1-nitropentan-2-yl)-1,5-dioxaspiro[5.5]undecane-2,4-dione.** The procedure for hydrolysis and decarboxylation was adapted from U.S. Patent WO2008117305 for industrial Lyrica production.<sup>9</sup> To the flask containing the crude (*S*)-3-(4-methyl-1-nitropentan-2-yl)-1,5-dioxaspiro[5.5]undecane-2,4-dione (313 g, 1.00 mol) was added toluene (0.83 L) and *p*-toluenesulfonic acid monohydrate (86.0 g, 0.500 mol). It should be noted that 0.25 equiv of *p*-toluenesulfonic acid was used with respect to the sum of the adduct and excess cyclohexyl Meldrum's acid. Finally, H<sub>2</sub>O (45 mL, 2.5 mol) was added and the flask was fitted with a condenser with an N<sub>2</sub> inlet at the top and with an internal temperature probe. The reaction mixture was heated in an oil bath such that the internal

temperature was 90 °C for 24 h. An intermediate, which was presumably the diacid hydrolysis product, rapidly formed (<2 h) as determined by NMR analysis of an aliquot of the reaction mixture (vide infra). The reaction progress was monitored by taking an aliquot (5 µL) of the reaction mixture, blowing off the toluene, diluting the residue with CDCl<sub>3</sub>, and monitoring by <sup>1</sup>H NMR for the disappearance of the diastereotopic α-CH<sub>2</sub> of the diacid intermediate: <sup>1</sup>H NMR (400 MHz, CDCl<sub>3</sub>) δ 4.71 (dd, *J* = 13.6, 5.7 Hz, 1H). Once the reaction was determined to be complete, the reaction mixture was allowed to cool to room temperature. Then the reaction flask was placed in an ice bath, and with rapid stirring a ~30% solution of Na<sub>2</sub>CO<sub>3</sub> was slowly added until the pH was 8. Then the biphasic mixture was transferred to a 6 L separatory funnel. The aqueous layer was separated, and the organic layer was extracted a second time with 30% Na<sub>2</sub>CO<sub>3</sub> solution. The combined aqueous layers were washed with toluene (250 mL) and then transferred to a x 4 L Erlenmeyer flask fitted with 1.5 inch oval stir bar. The flask was placed in an ice bath, toluene was added (0.5 L), and the resulting mixture was allowed to cool to 0 °C with stirring. Then, with stirring, 3 M HCl was added until the aqueous layer reached pH <2. The biphasic mixture was transferred back to the separatory funnel, and an additional 250 mL of toluene was added. The layers were separated, and the acidic layer was extracted a second time with toluene (250 mL). The combined organic layers were washed with brine (2 X 200 mL) and then dried over magnesium sulfate, filtered and concentrated to afford monoacid **15** (170 g, 0.90 mol), which was obtained as a viscous oil in 90% overall yield from *trans*-1-nitro-4-methyl-pent-1-ene. <sup>1</sup>H NMR (400 MHz, CDCl<sub>3</sub>) δ 4.52 (dd, *J* = 12.4, 6.8 Hz, 1H), 4.46 (dd, *J* = 12.4, 5.8 Hz, 1H), 2.69 (dtd, *J* = 6.8, 6.4, 5.8 Hz, 1H), 2.52 (d, *J* = 6.4 Hz, 2H), 1.67 (septet, *J* = 6.8 Hz, 1H), 1.35 – 1.25

(m, 2H), 0.93 (t,  $J = 6.8$  Hz, 6H).  $^{13}\text{C}$  NMR (126 MHz,  $\text{CDCl}_3$ )  $\delta$  178.49, 78.90, 40.82, 36.16, 32.20, 25.44, 22.84, 22.63.

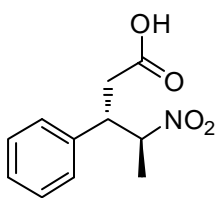

**Intermediate 16:** The procedure for hydrolysis and decarboxylation was adapted from U.S. Patent WO2008117305 for industrial Lyrica production.<sup>9</sup> To a vial containing adduct **14a** (104 mg, 0.3 mmol) was added toluene (0.25 mL), *p*-toluenesulfonic acid monohydrate (14 mg, 0.075 mmol), and water (6  $\mu\text{L}$ ). The reaction mixture was heated at 90  $^\circ\text{C}$  for 24 h and then was cooled to rt. The reaction mixture was diluted with toluene (1-2 mL) then washed with 2 x 1 mL of 5%  $\text{Na}_2\text{CO}_{3(\text{aq})}$ . The combined aqueous layers were washed with 1 mL of toluene, and the toluene layers were discarded. The aqueous layer was acidified to pH 2 with 1 N  $\text{HCl}_{(\text{aq})}$ , then extracted with 3 x 3 mL of toluene. The combined organic layers were dried over  $\text{Na}_2\text{SO}_4$ , filtered and concentrated *in vacuo* to afford nitro monoacid **16** as a single diastereomer (62 mg, 93% yield). Intermediate **16** was obtained as an oil,  $[\alpha]_{\text{D}}^{20} = +13.3$  ( $c$  1.0,  $\text{CHCl}_3$ ): IR (neat): 3064, 3032, 2993, 2946, 1712, 1549, 1496, 1454, 1389, 1360, 1261, 1082  $\text{cm}^{-1}$ .  $^1\text{H}$  NMR (400 MHz,  $\text{CDCl}_3$ )  $\delta$  7.29 – 7.18 (m, 3H), 7.11 – 7.06 (m, 2H), 4.81 – 4.54 (dq,  $J = 6.8, 6.4$  Hz, 1H), 3.65 – 3.45 (ddd,  $J = 10.0, 4.8, 6.8$  Hz, 1H), 2.74 – 2.68 (dd,  $J = 16.4, 10.0$  Hz, 1H), 2.64-2.58 (dd,  $J = 16.4, 4.8$  Hz, 1H), 1.26 (d,  $J = 6.4$  Hz, 3H).  $^{13}\text{C}$  NMR (126 MHz,  $\text{CDCl}_3$ )  $\delta$  176.34, 134.14, 129.06, 128.12, 86.79, 45.87, 37.28, 17.65. HRMS-ESI ( $m/z$ ):  $[\text{M}+\text{Na}]^+$  calcd for  $\text{C}_{11}\text{H}_{13}\text{NO}_4$ , 246.07368; found, 246.07377.

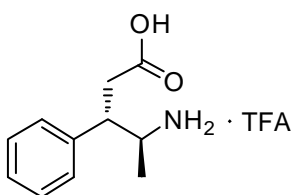

**Amino Acid 17:** The procedure for reduction was adapted from a literature procedure by Grenning et al.<sup>10</sup> To a 10 mL vial with stir bar was added nitro acid **16** (50 mg, 0.224 mmol), zinc

dust (283 mg, 4.35 mmol) then isopropanol (0.1 mL) and aqueous HCl (2.24 mL, 1 M). The reaction flask was placed in an oil bath and heated to 50 °C for 2 h. The reaction mixture was then filtered over a cotton plug to remove excess zinc metal, concentrated and then purified by reverse phase chromatography on a C18 column (5-100% methanol in water with 0.1% TFA) to provide the TFA salt of the amino acid as a single diastereomer (67 mg, 97%). Product **17** was obtained as an oil,  $[\alpha]_D^{20} = +0.6$  (*c* 0.85, MeOH): IR (neat): 2924, 2854, 1663, 1456, 1180, 1137, 799, 757, 701  $\text{cm}^{-1}$ .  $^1\text{H}$  NMR (500 MHz, MeOH- $d_4$ )  $\delta$  7.39 (m, 2H), 7.34 (m, 1H), 7.32 – 7.27 (m, 2H), 3.65 (dq, *J* = 7.0, 6.7 Hz, 1H), 3.38 – 3.36 (m, 1H), 2.92 (dd, *J* = 16.1, 5.7 Hz, 1H), 2.80 (dd, *J* = 16.1, 9.1 Hz, 1H), 1.15 (d, *J* = 6.7 Hz, 3H).  $^{13}\text{C}$  NMR (126 MHz, MeOH- $d_4$ )  $\delta$  174.73, 139.58, 129.98, 129.71, 128.92, 52.04, 46.89, 38.02, 16.51.  $^{19}\text{F}$  NMR (400 MHz, MeOH- $d_4$ )  $\delta$  -77.04. HRMS-ESI (*m/z*):  $[\text{M}+\text{H}]^+$  calcd for  $\text{C}_{11}\text{H}_{15}\text{NO}_2$ , 194.11756; found, 194.11717.

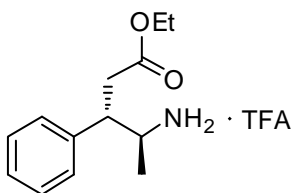

**Amino Ethyl Ester 18:** The procedure for reduction was adapted from a literature procedure by Kimmel et al.<sup>4</sup> To a 4-mL vial with a stir bar and plastic cap was added anhydrous tin(II)

chloride (378 mg, 2.0 mmol) and nitro monoacid **16** (45 mg, 0.2 mmol). In a separate vial, dry ethanol (2 mL) and acetyl chloride (0.14 mL, 2.0 mmol) were premixed and let sit until heat of mixing subsided, and the mixture was then added to reaction vial all in one portion. The reaction vial was placed in a 95 °C oil bath and reaction mixture was stirred at reflux for 20 h and then was allowed to cool to room temperature. The solvent was evaporated *in vacuo* and the crude residue was purified by reverse phase chromatography on a C18 column (5-100% methanol in water with 0.1% TFA) to provide the TFA salt of the amino ethyl ester as a single diastereomer (41 mg, 61%).



Product **18** was obtained as an oil,  $[\alpha]_D^{20} = +4.8$  ( $c$  1.0, MeOH): IR (neat): 2983, 1671, 1537, 1431, 1375, 1178, 1134, 1025, 907, 837, 721, 701  $\text{cm}^{-1}$ .  $^1\text{H}$  NMR (400 MHz, MeOH- $d_4$ )  $\delta$  7.46 – 7.23 (m, 5H), 4.00 (q,  $J = 7.1$  Hz, 2H), 3.69 – 3.58 (m, 1H), 3.37 (m, 1H), 2.93 (dd,  $J = 15.7, 5.4$  Hz, 1H), 2.82 (dd,  $J = 15.7, 9.8$  Hz, 1H), 1.14 (d,  $J = 6.7$  Hz, 3H), 1.09 (t,  $J = 7.1$  Hz, 3H).  $^{13}\text{C}$  NMR (126 MHz, MeOH- $d_4$ )  $\delta$  172.76, 139.31, 129.97, 129.72, 129.00, 61.76, 52.03, 47.13, 38.24, 16.60, 14.27.  $^{19}\text{F}$  NMR (400 MHz, MeOH- $d_4$ )  $\delta$  -76.99. HRMS-ESI ( $m/z$ ):  $[\text{M}+\text{H}]^+$  calcd for  $\text{C}_{13}\text{H}_{19}\text{NO}_2$ , 222.14886; found, 222.14820.

## References

- 1) Zhu, Y.; Malerich, J. P.; Rawal, V. H. *Angew. Chem., Int. Ed.* **2010**, *49*, 153-156.

- 2) Han, Z.; Krishnamurthy, D.; Grover, P.; Fang, Q. K.; Senanayake, C. H. *J. Am. Chem. Soc.* **2002**, *124*, 7880-7881.
- 3) Davis, F. A.; Ramachandar, T.; Wu, Y. *J. Org. Chem.* **2003**, *68*, 6894-6898.
- 4) Kimmel, K. L.; Robak, M. T.; Ellman, J. A. *J. Am. Chem. Soc.* **2009**, *131*, 8754-8755.
- 5) Fuerst, D. E.; Jacobsen, E. N. *J. Am. Chem. Soc.* **2005**, *127*, 8964-8965.
- 6) Costello, G. F.; James, R.; Shaw, J. S.; Slater, A. M.; Stutchbury, N. C. J. *J. Med. Chem.* **1991**, *34*, 181-189.
- 7) Bassas, O.; Huuskonen, J.; Rissanen, K.; Koskinen, A. M. P. *Eur. J. Org. Chem.* **2009**, 1340-1351.
- 8) Velikorodov, A. V. *Russ. J. Org. Chem.* **2004**, *40*, 690-692.
- 9) Bobba, V. S. K.; Sanikommu, S. R.; More, B. M.; Metil, D. S.; Kulkarni, P. B.; Prabahar, K. J.; Khan, M., Novel Process for Preparing Pregabalin and its Acid Addition Salts. U.S. Patent WO2008117305(A2), October 2, 2008.
- 10) Grenning, J. A.; Tunge, J. A. *Org. Lett.* **2010**, *12*, 740-742.

**12a: (R)-3-(2-nitro-1-phenylethyl)-1,5-dioxaspiro[5.5]undecane-2,4-dione**

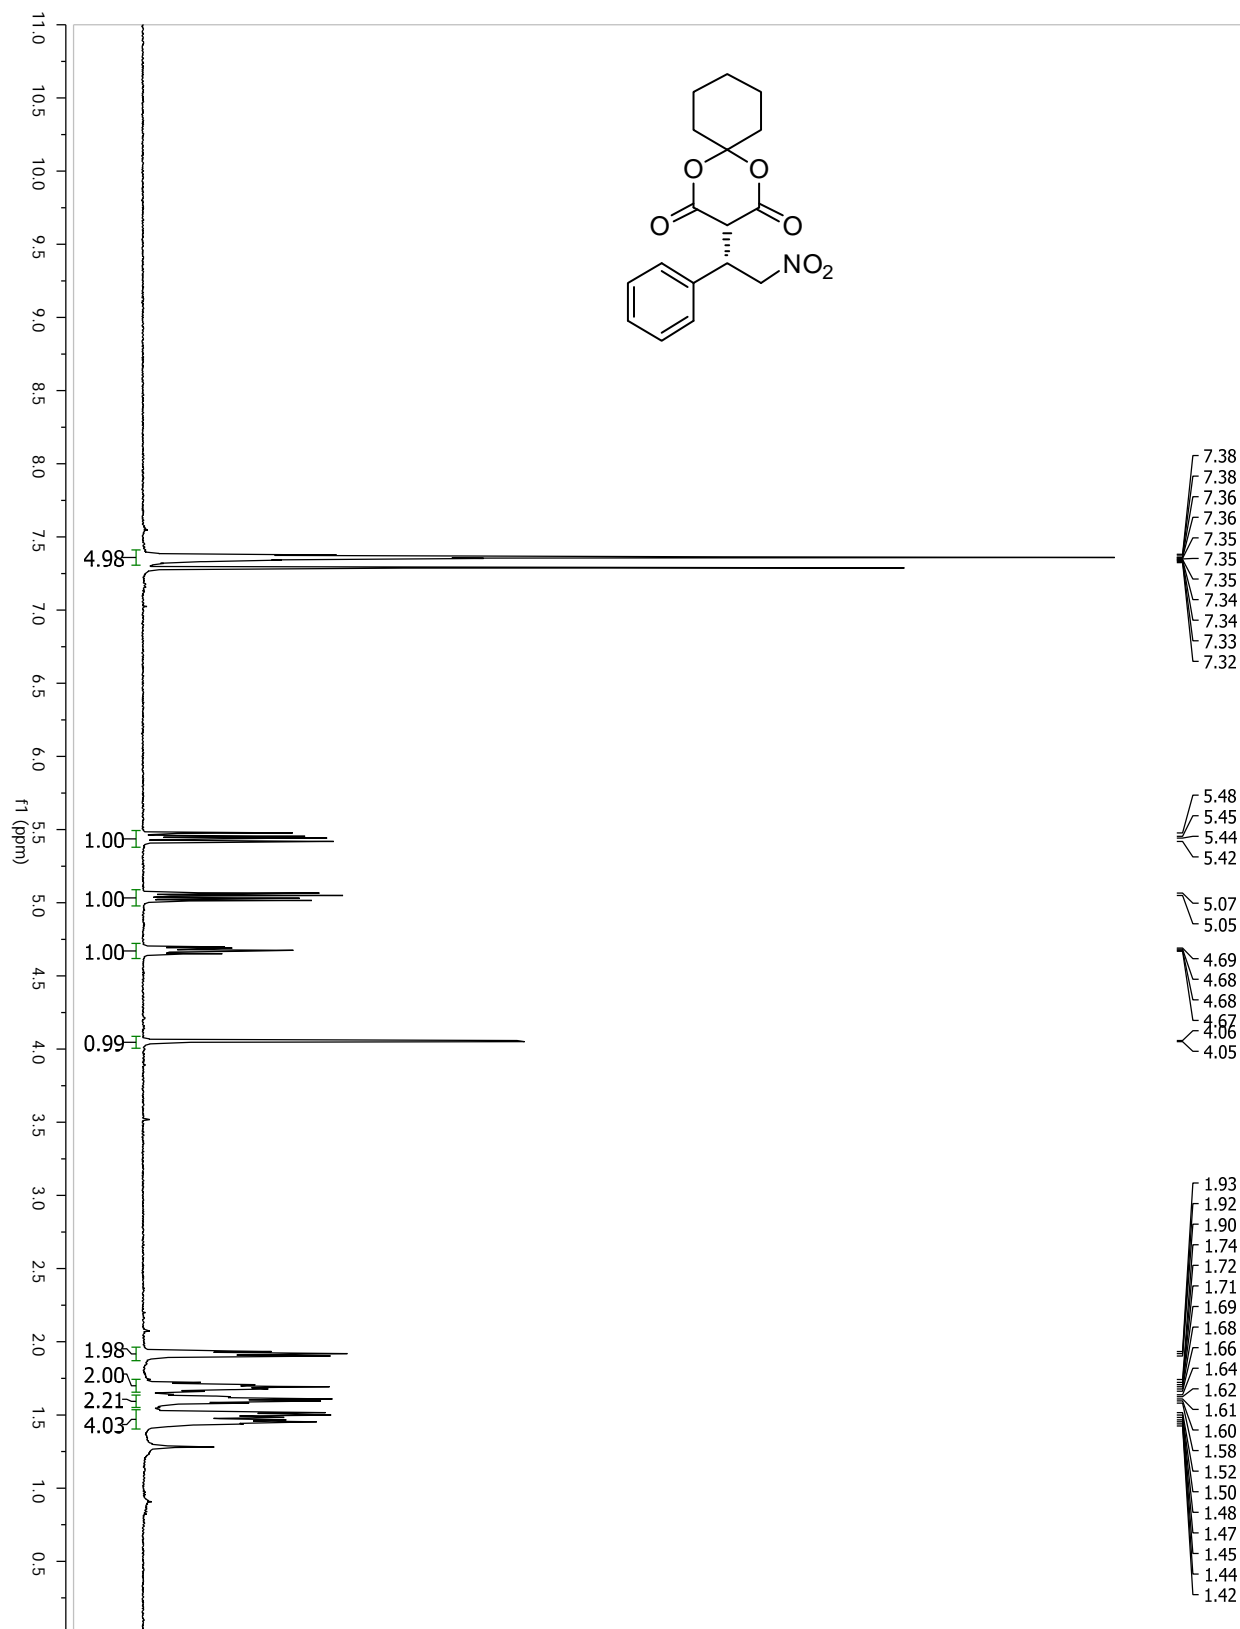

12a: (R)-3-(2-nitro-1-phenylethyl)-1,5-dioxaspiro[5.5]undecane-2,4-dione

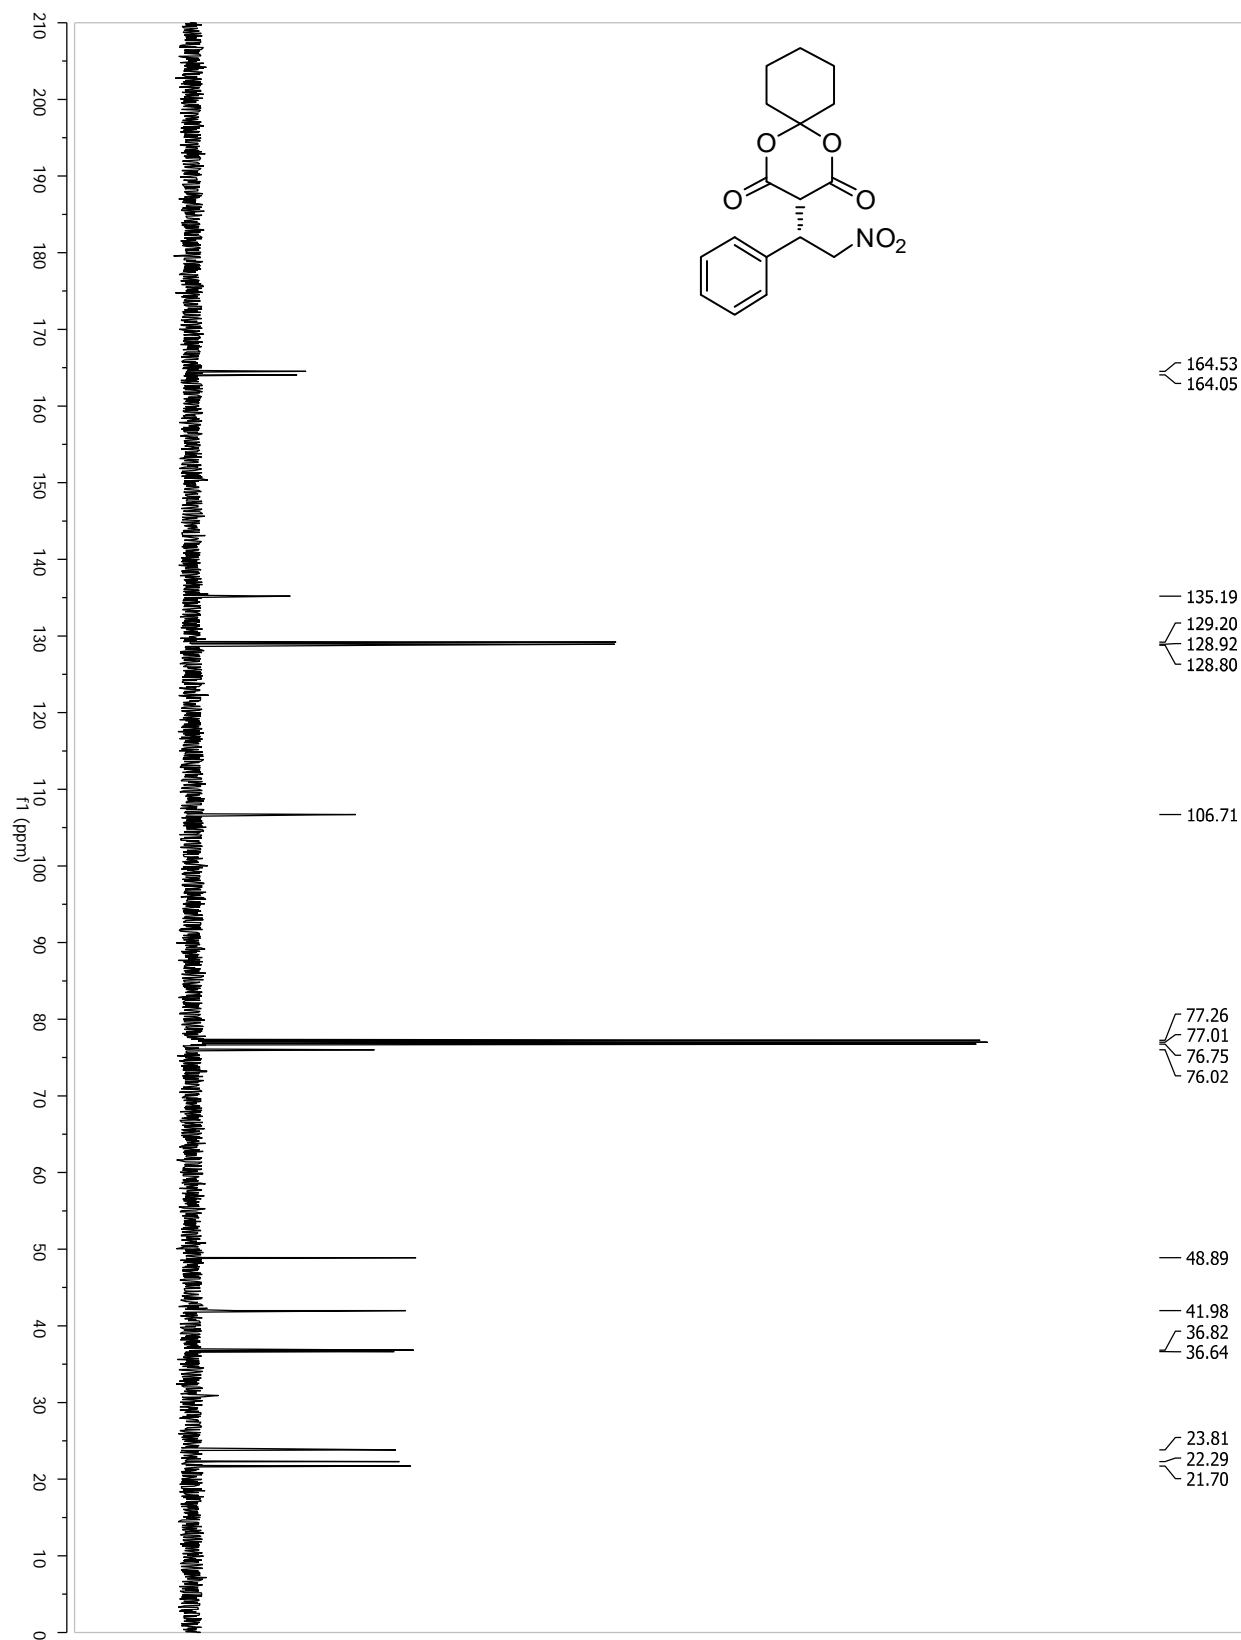

**12b:** (*R*)-3-(4-methyl-1-nitropentan-2-yl)-1,5-dioxaspiro[5.5]undecane-2,4-dione

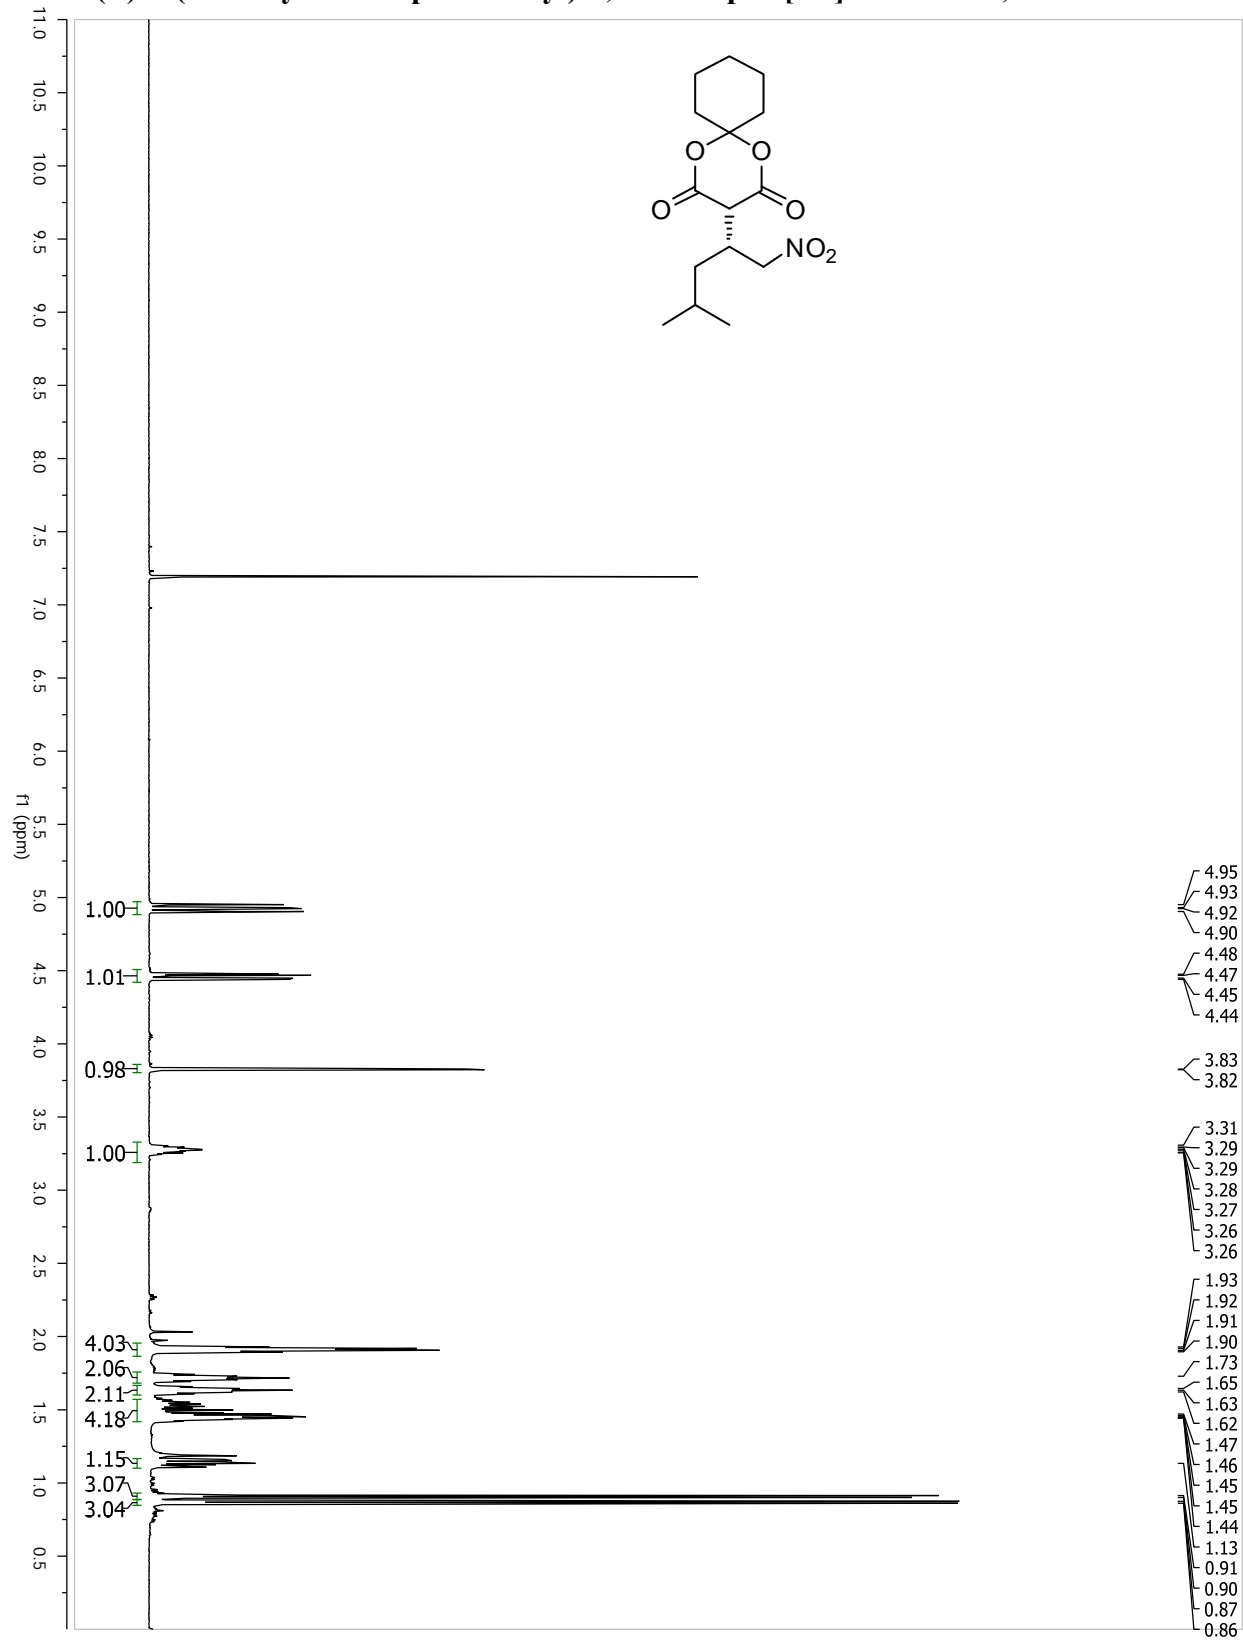

**12b:** (*R*)-3-(4-methyl-1-nitropentan-2-yl)-1,5-dioxaspiro[5.5]undecane-2,4-dione

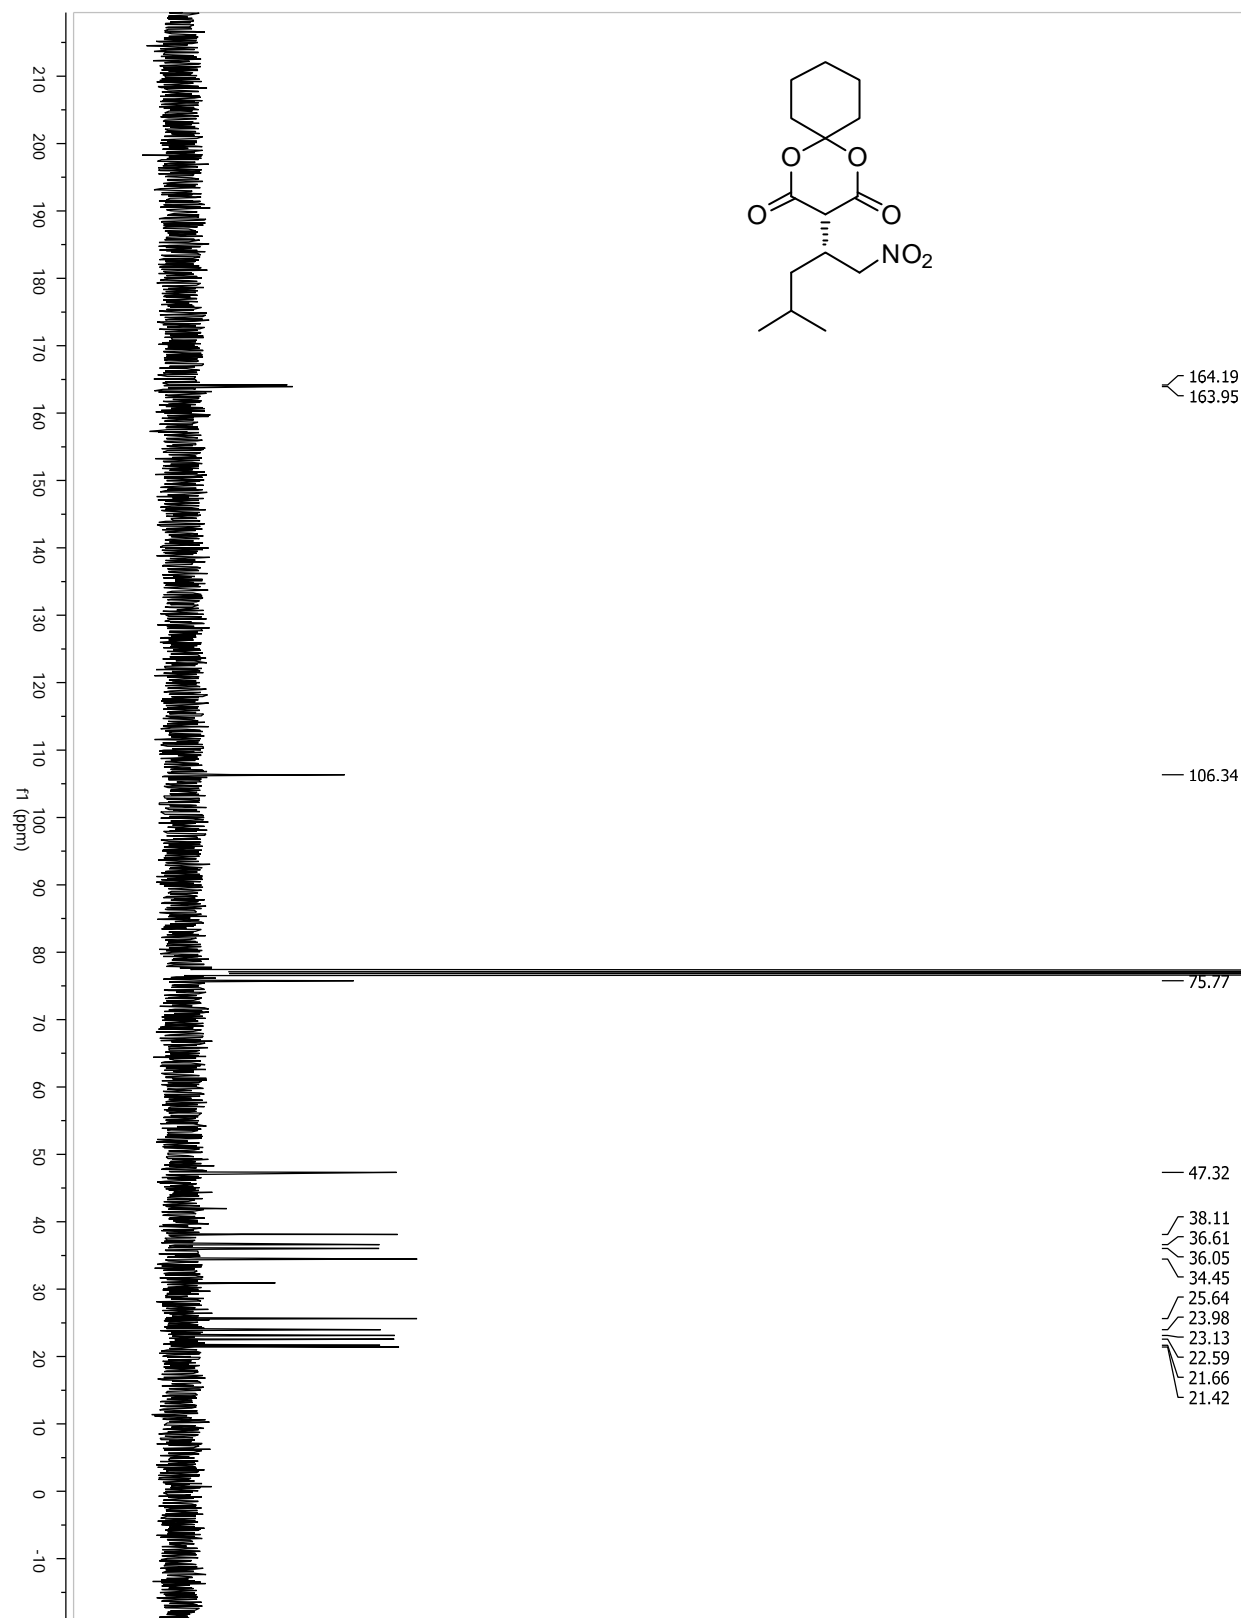

**12c: (R)-3-(2-nitro-1-o-tolyethyl)-1,5-dioxaspiro[5.5]undecane-2,4-dione**

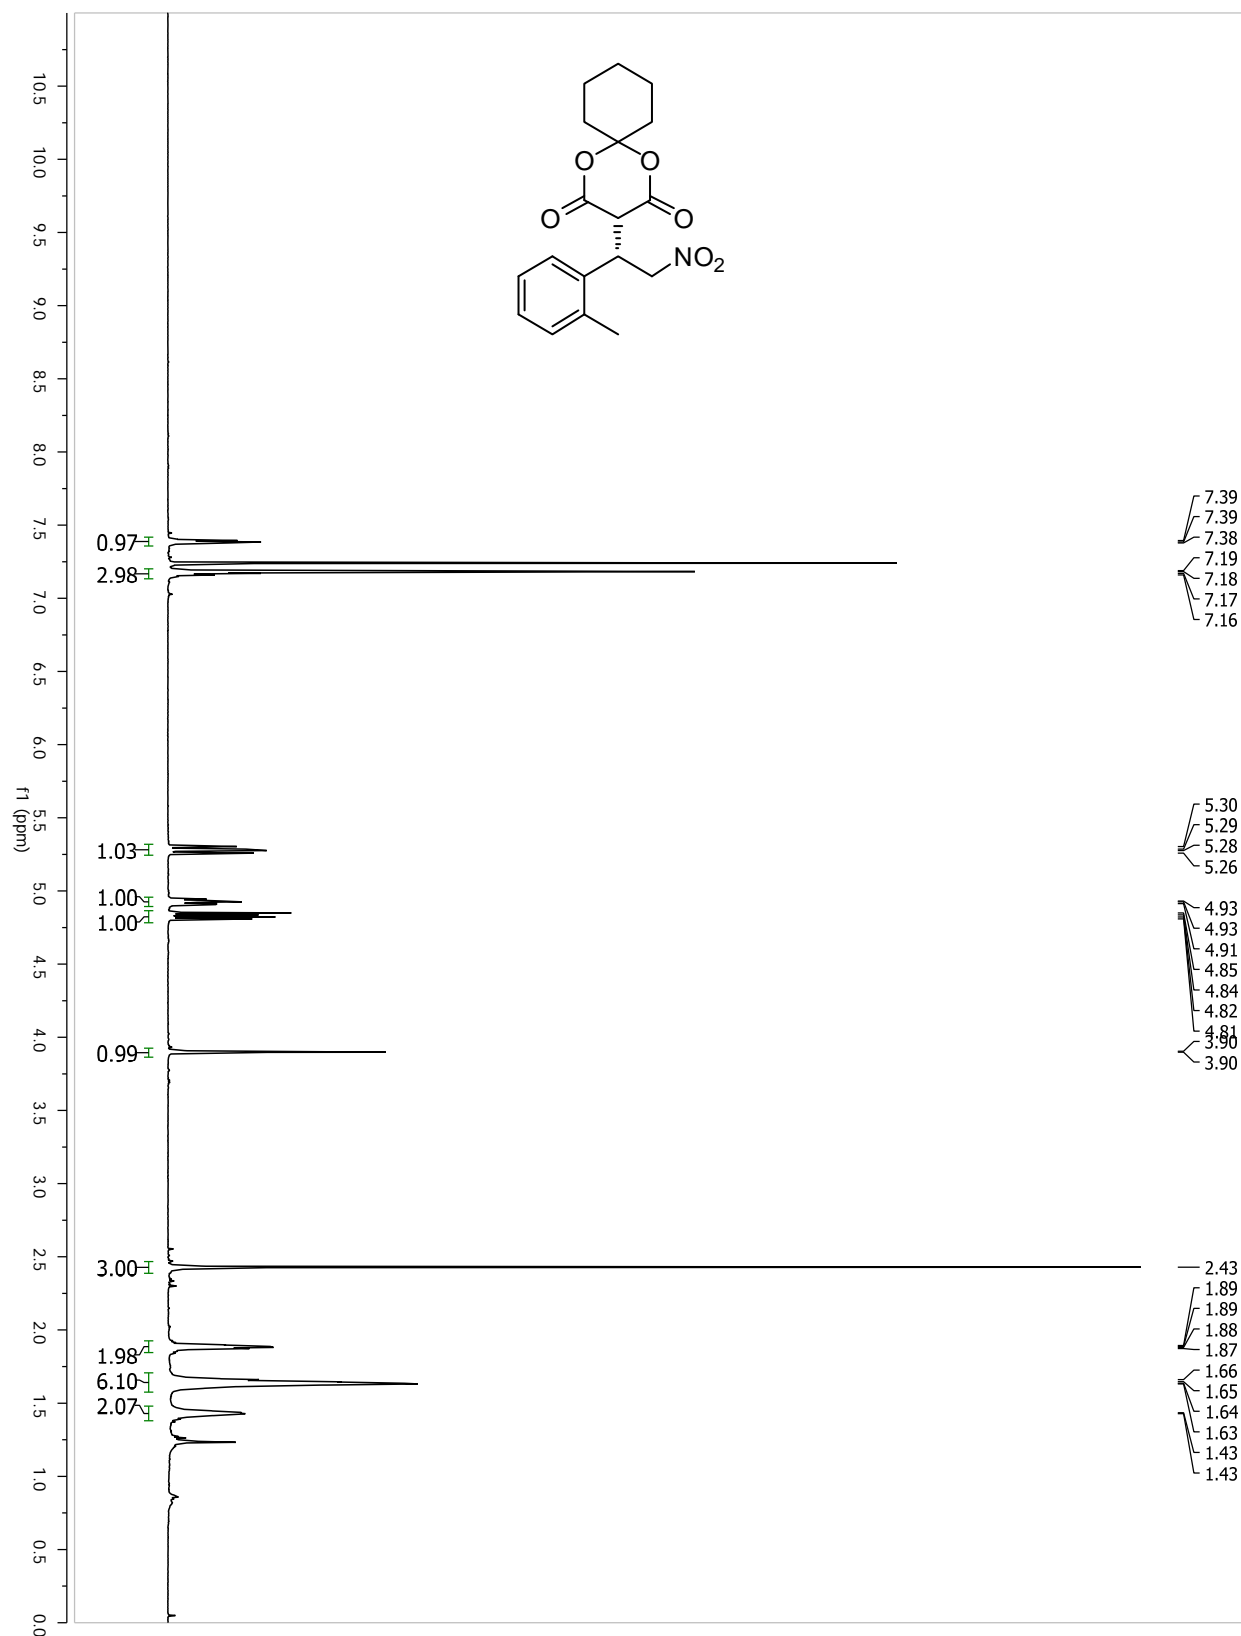

**12c:** (*R*)-3-(2-nitro-1-o-tolyylethyl)-1,5-dioxaspiro[5.5]undecane-2,4-dione

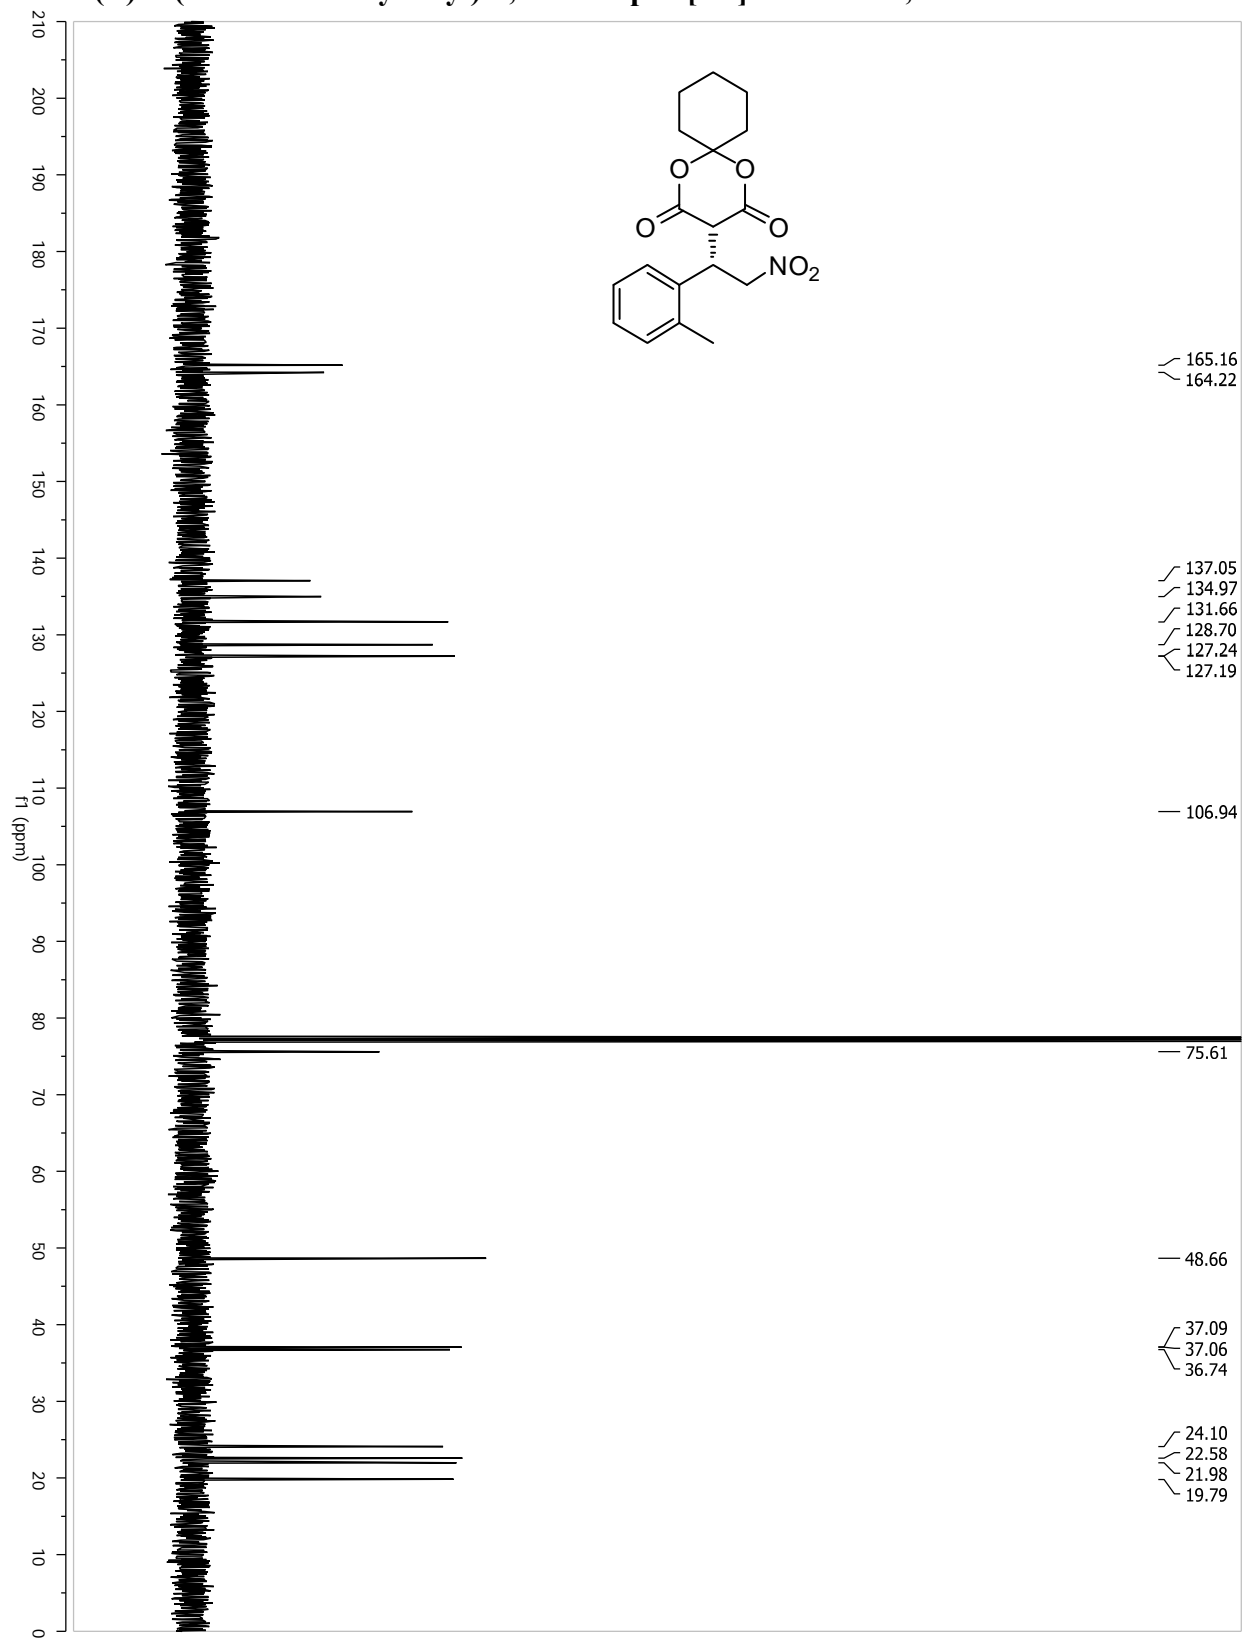



**12d: (R)-3-(2-nitro-1-p-tolylolethyl)-1,5-dioxaspiro[5.5]undecane-2,4-dione**

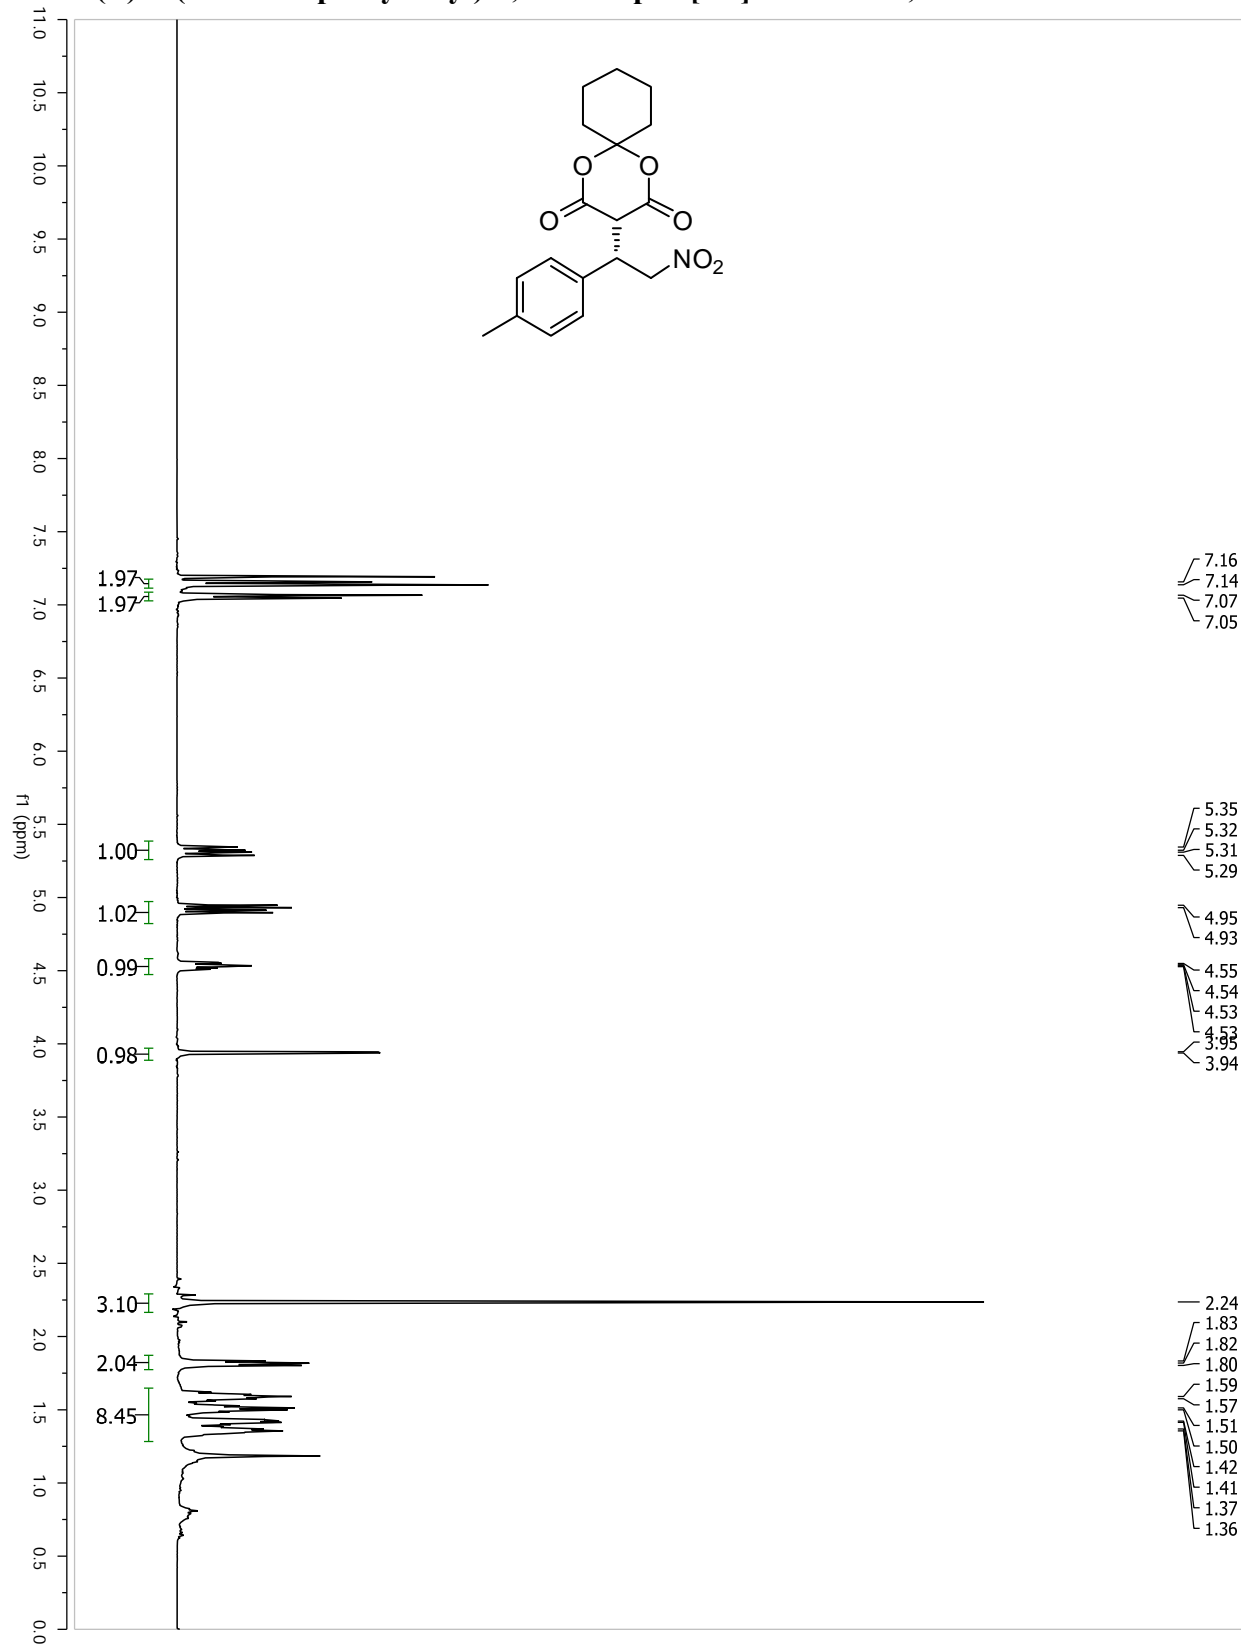

**12d: (R)-3-(2-nitro-1-p-tolyloethyl)-1,5-dioxaspiro[5.5]undecane-2,4-dione**

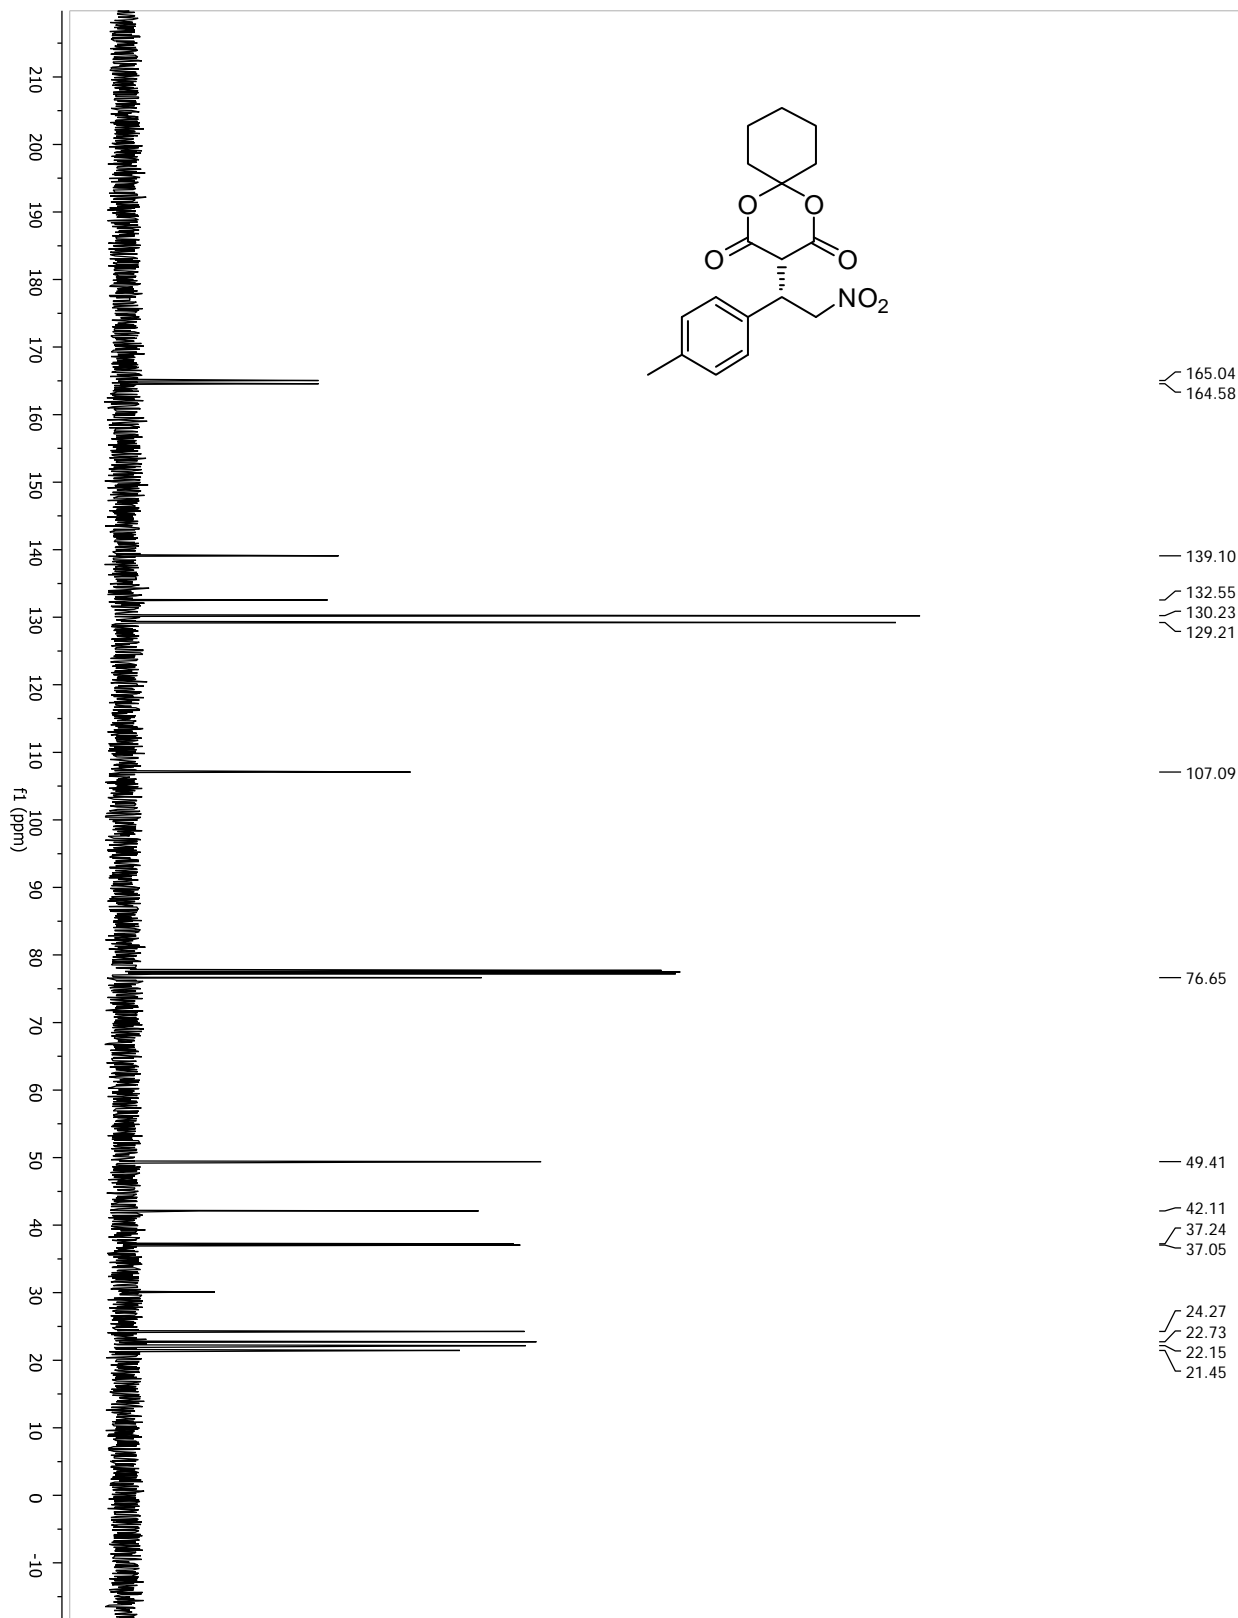

**12e: (R)-3-(2-nitro-1-(4-(trifluoromethyl)phenyl)ethyl)-1,5-dioxaspiro[5.5]undecane-2,4-dione**

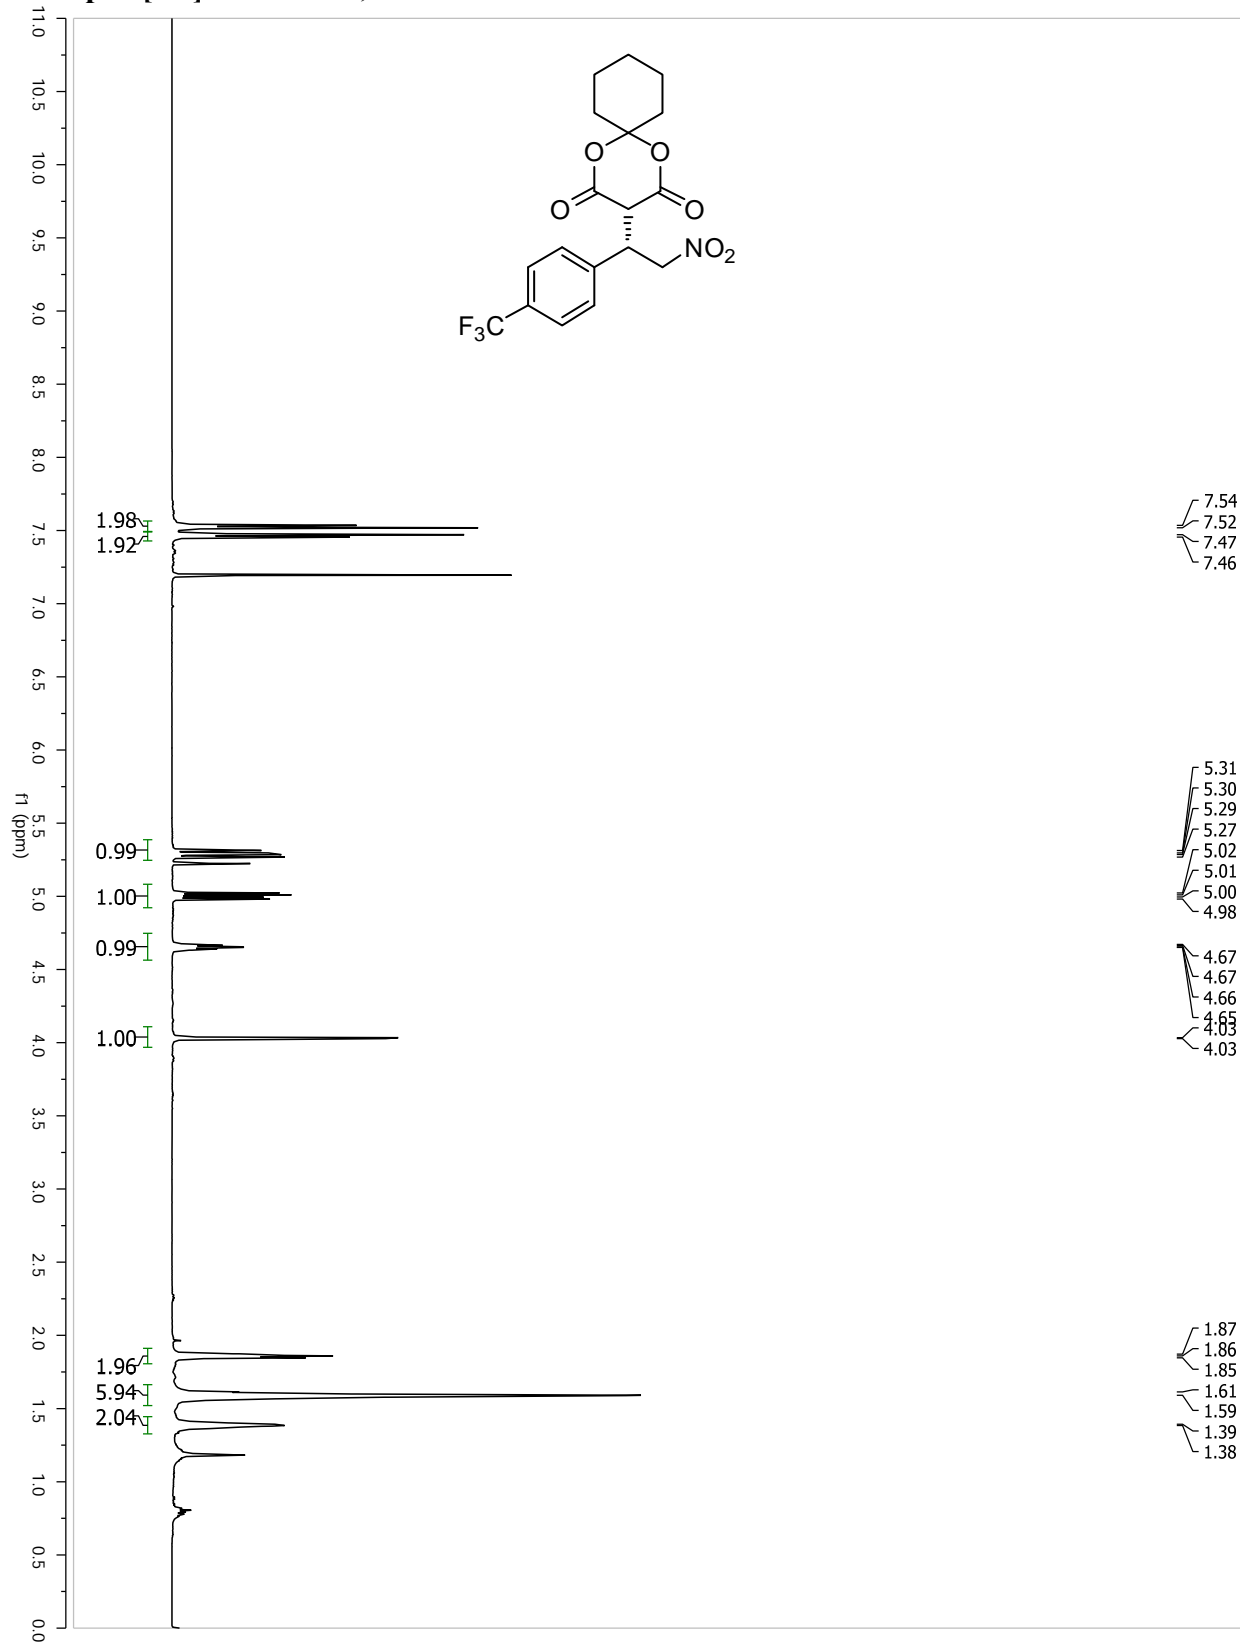

**12e: (R)-3-(2-nitro-1-(4-(trifluoromethyl)phenyl)ethyl)-1,5-dioxaspiro[5.5]undecane-2,4-dione**

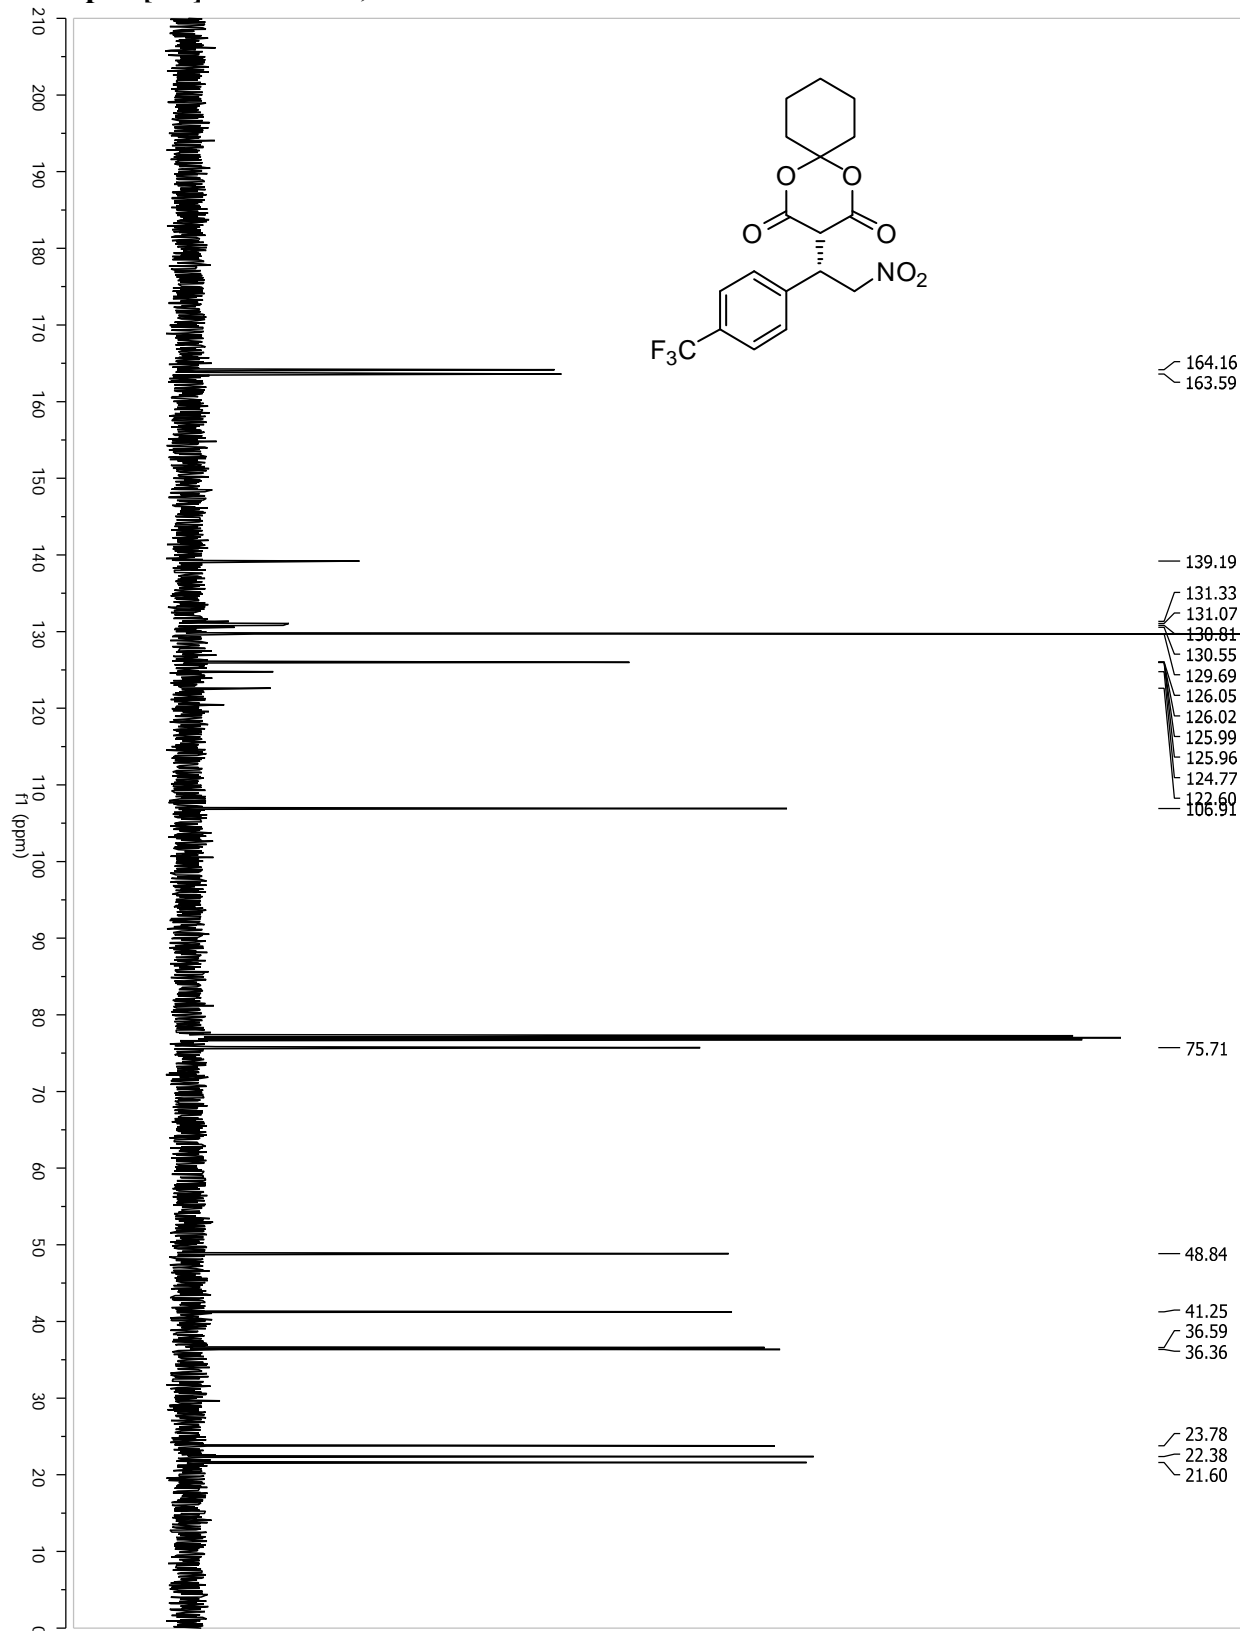

**12f: (R)-3-(1-(4-methoxyphenyl)-2-nitroethyl)-1,5-dioxaspiro[5.5]undecane-2,4-dione**

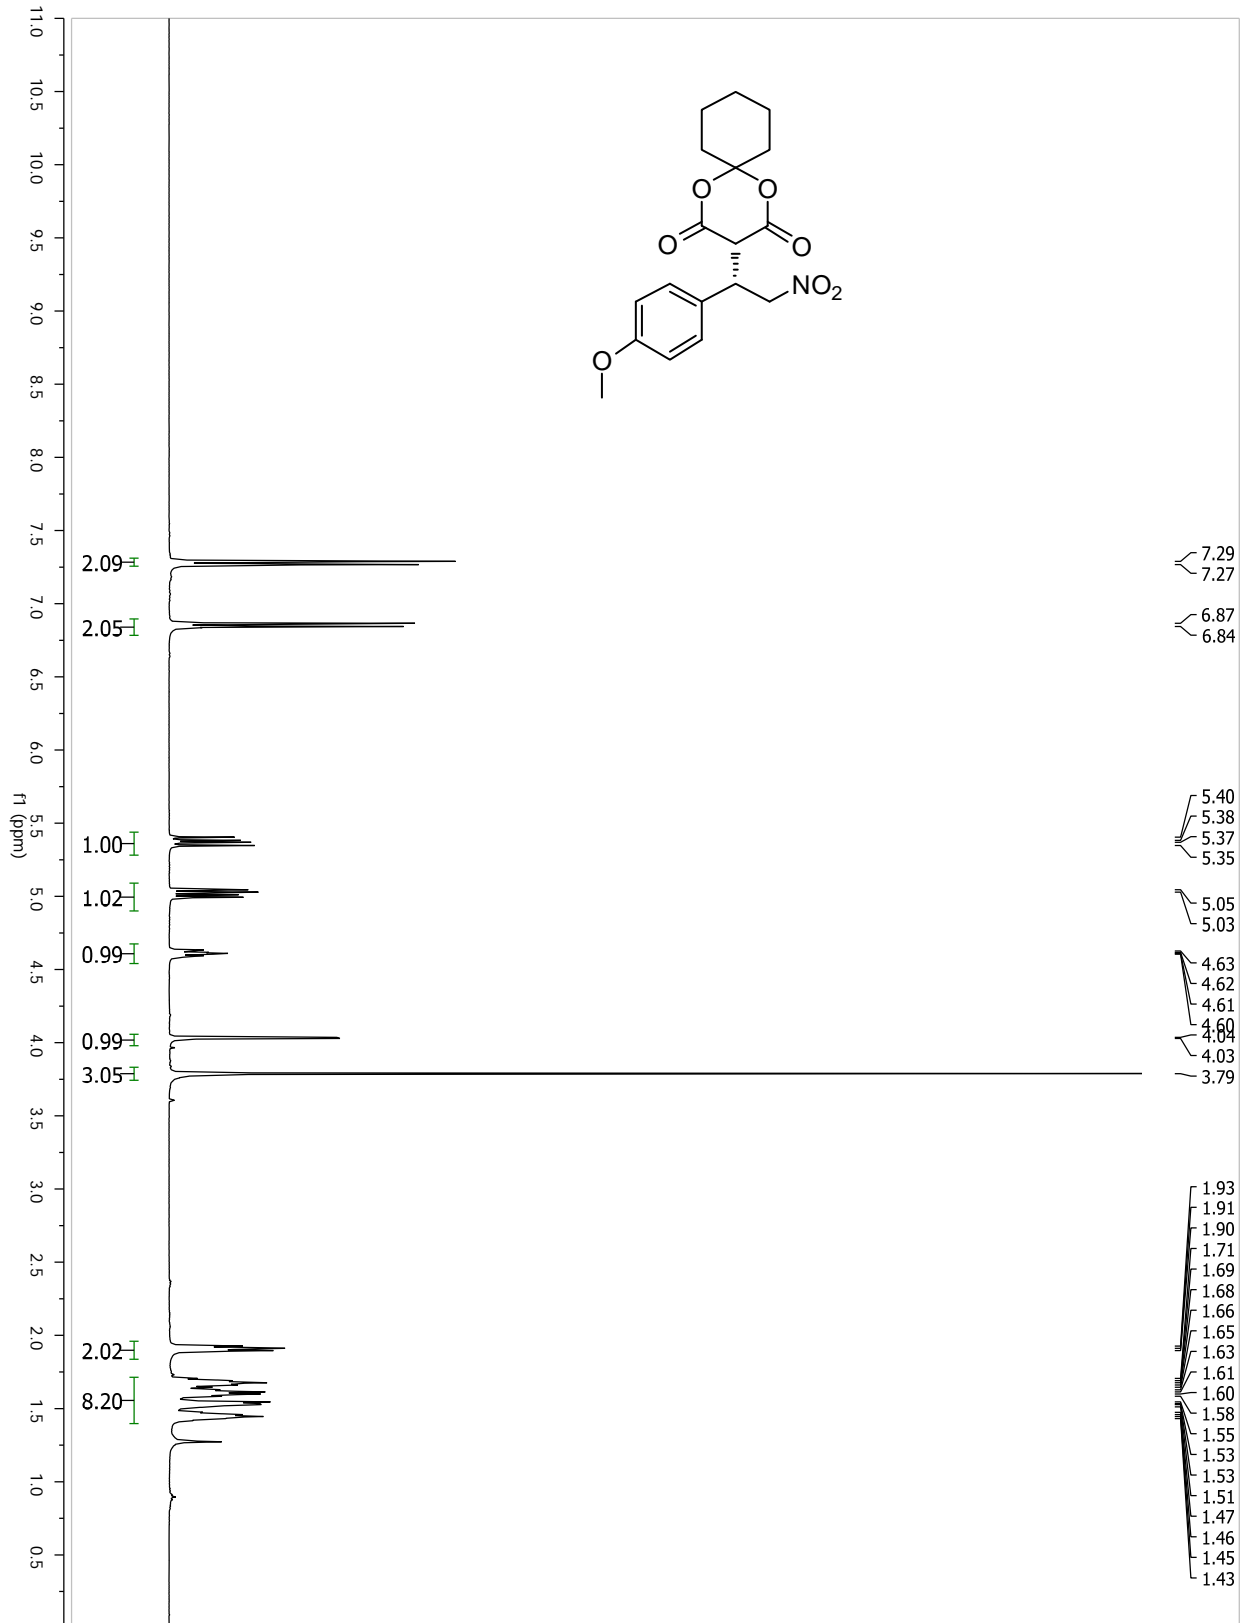

**12f: (R)-3-(1-(4-methoxyphenyl)-2-nitroethyl)-1,5-dioxaspiro[5.5]undecane-2,4-dione**

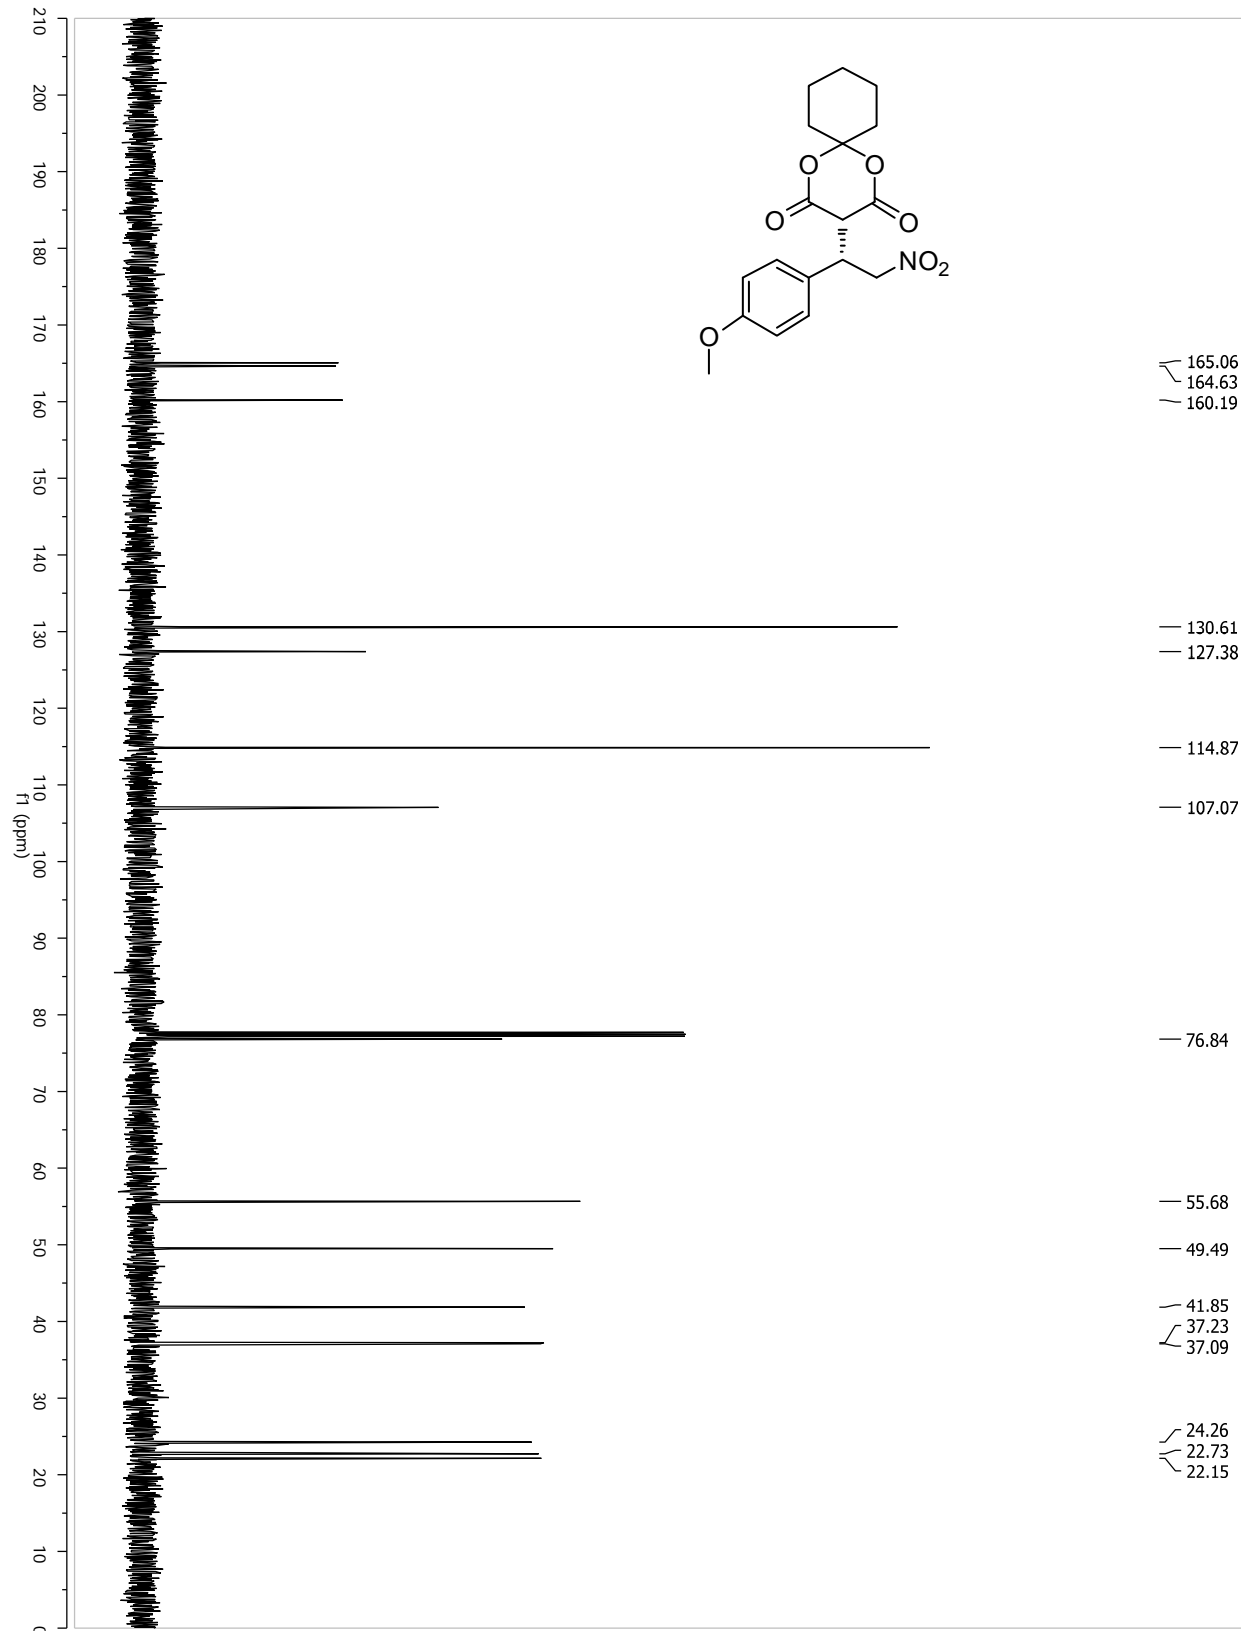

**12g: (R)-3-(1-(2,4-dichlorophenyl)-2-nitroethyl)-1,5-dioxaspiro[5.5]undecane-2,4-dione**

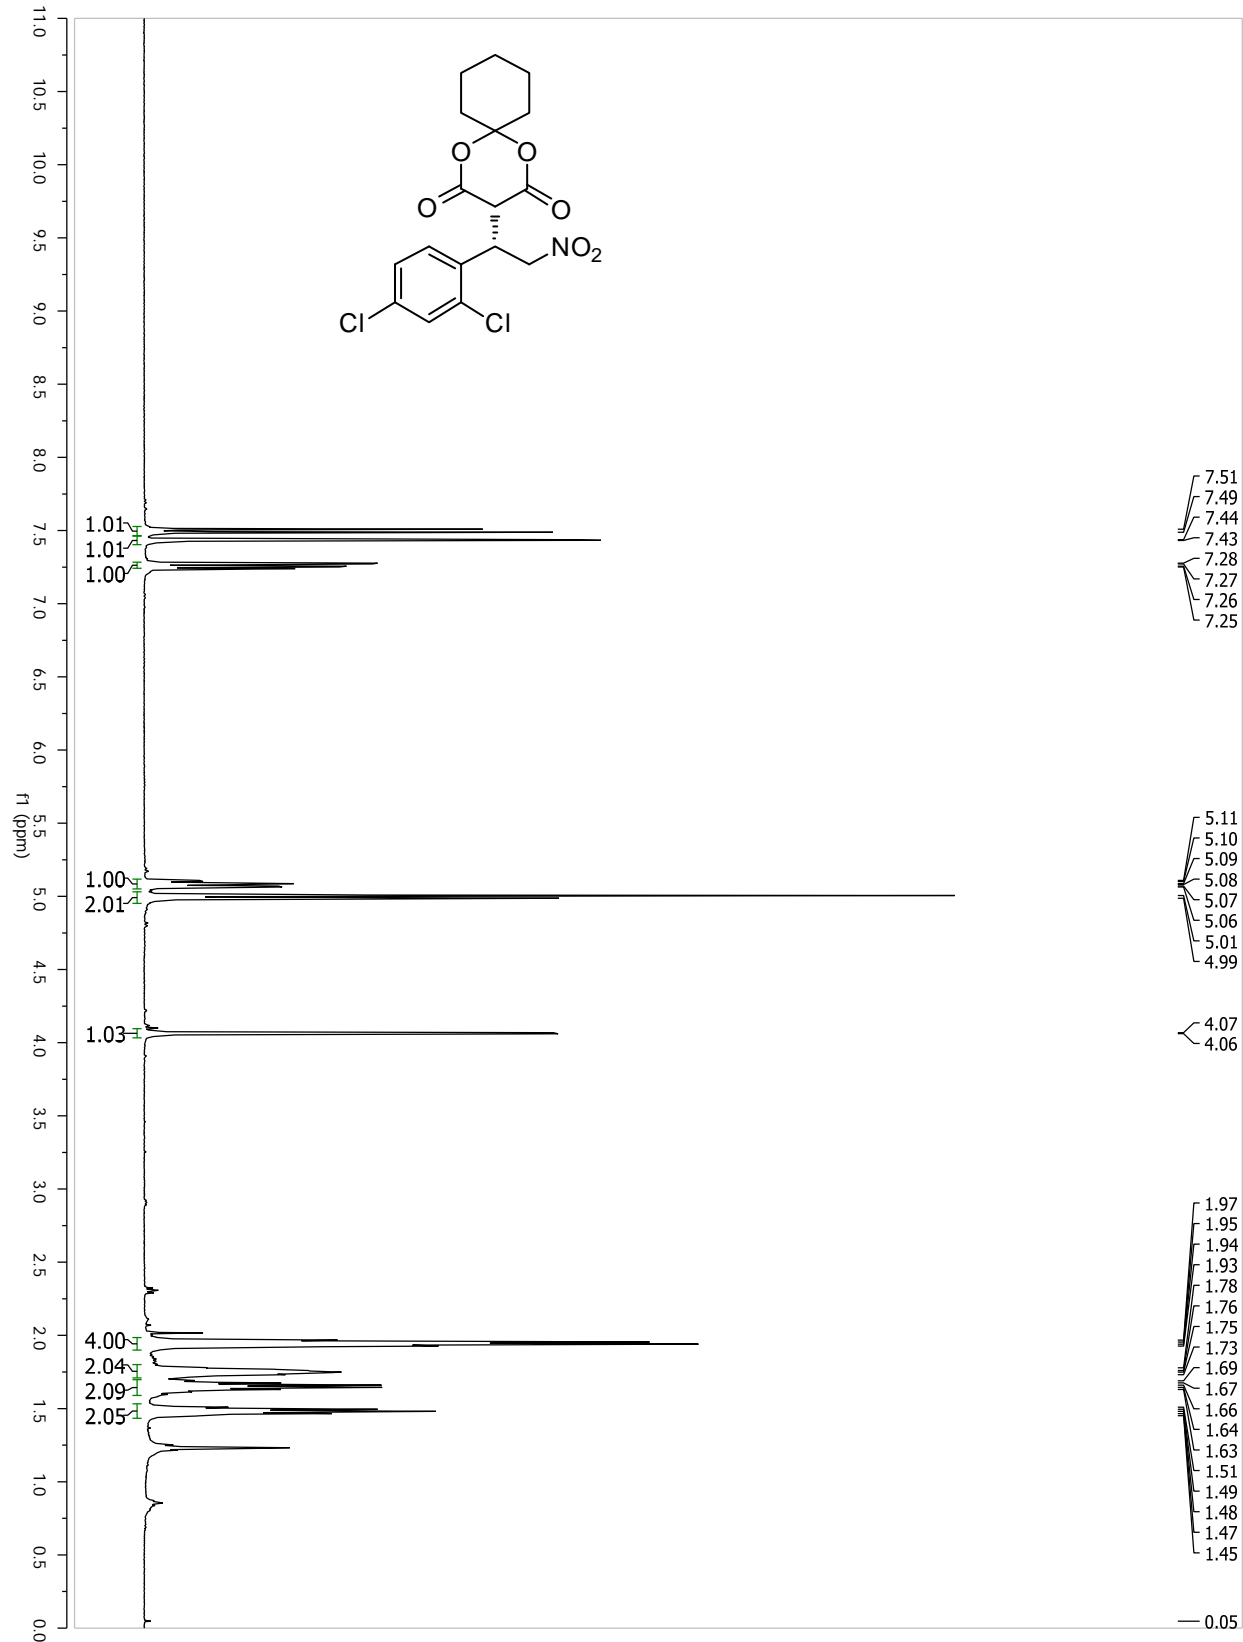

**12g: (R)-3-(1-(2,4-dichlorophenyl)-2-nitroethyl)-1,5-dioxaspiro[5.5]undecane-2,4-dione**

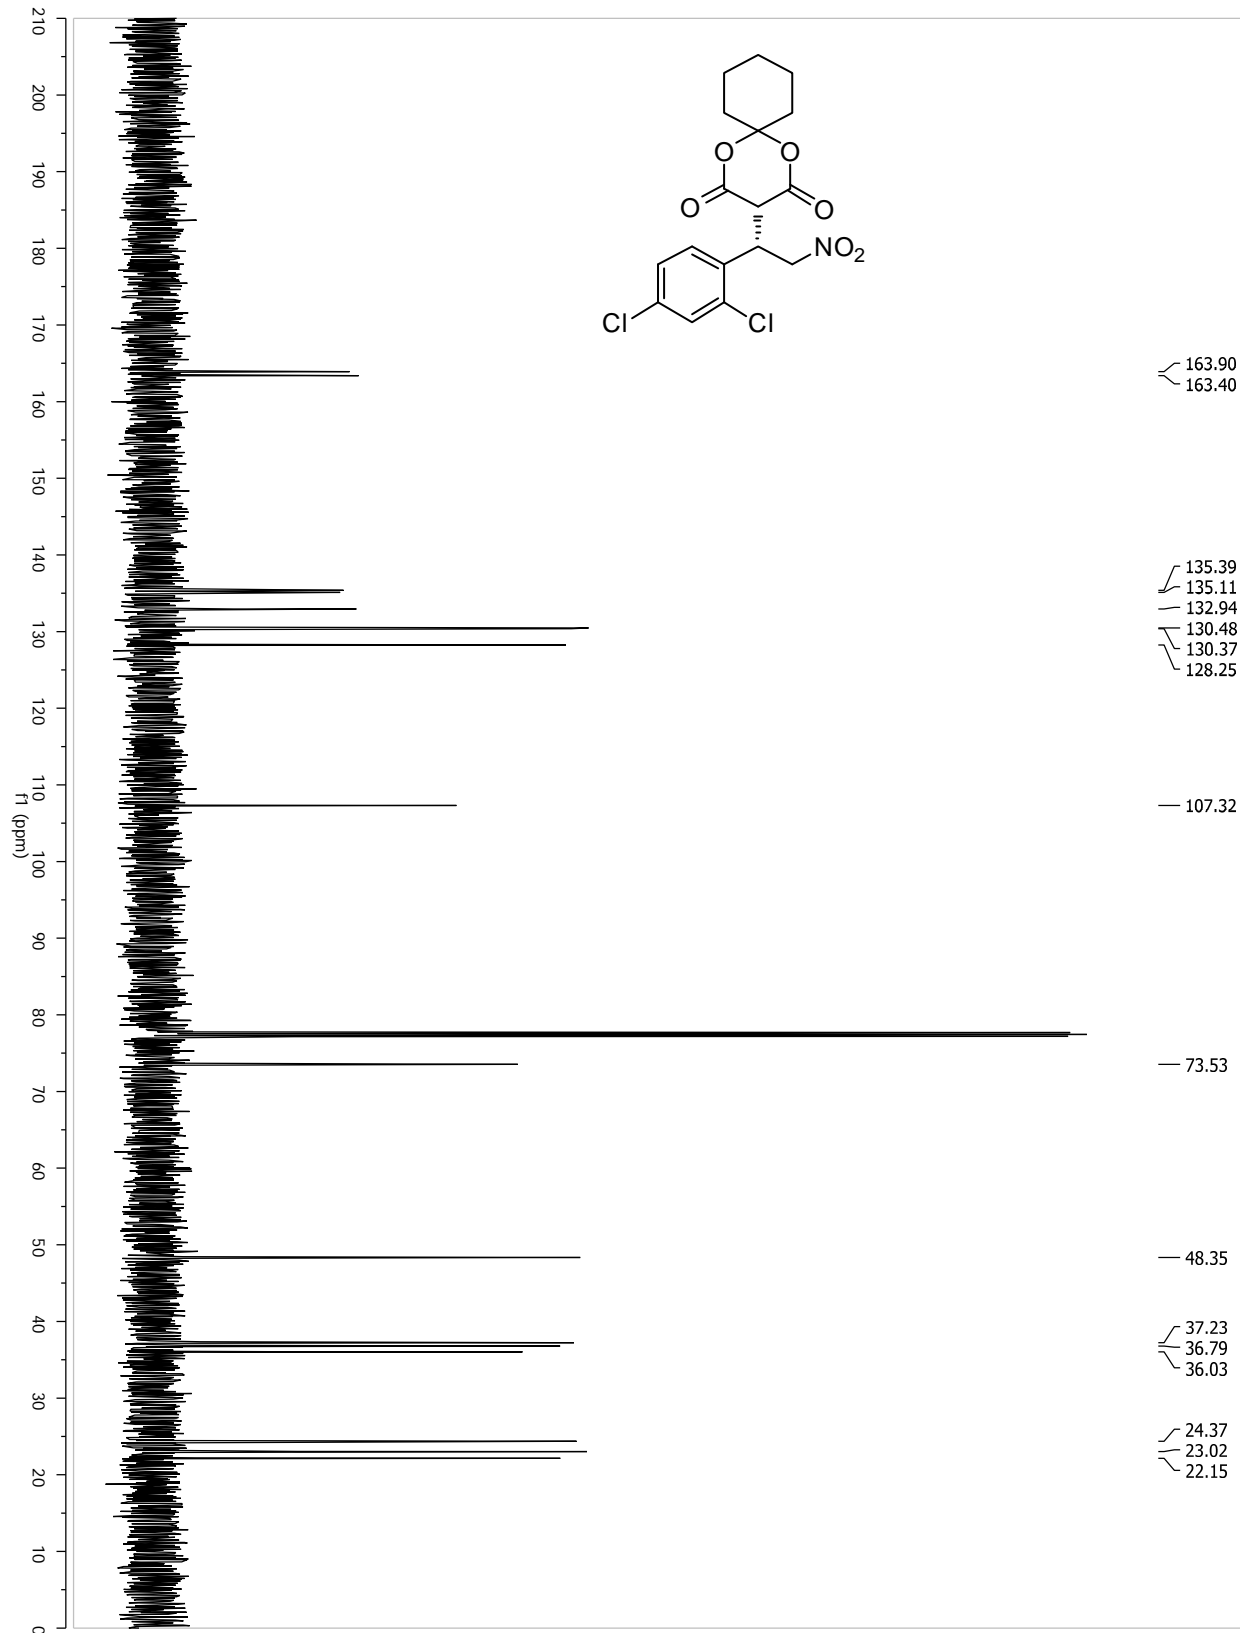



**12h: (R)-3-(1-nitropentan-2-yl)-1,5-dioxaspiro[5.5]undecane-2,4-dione**

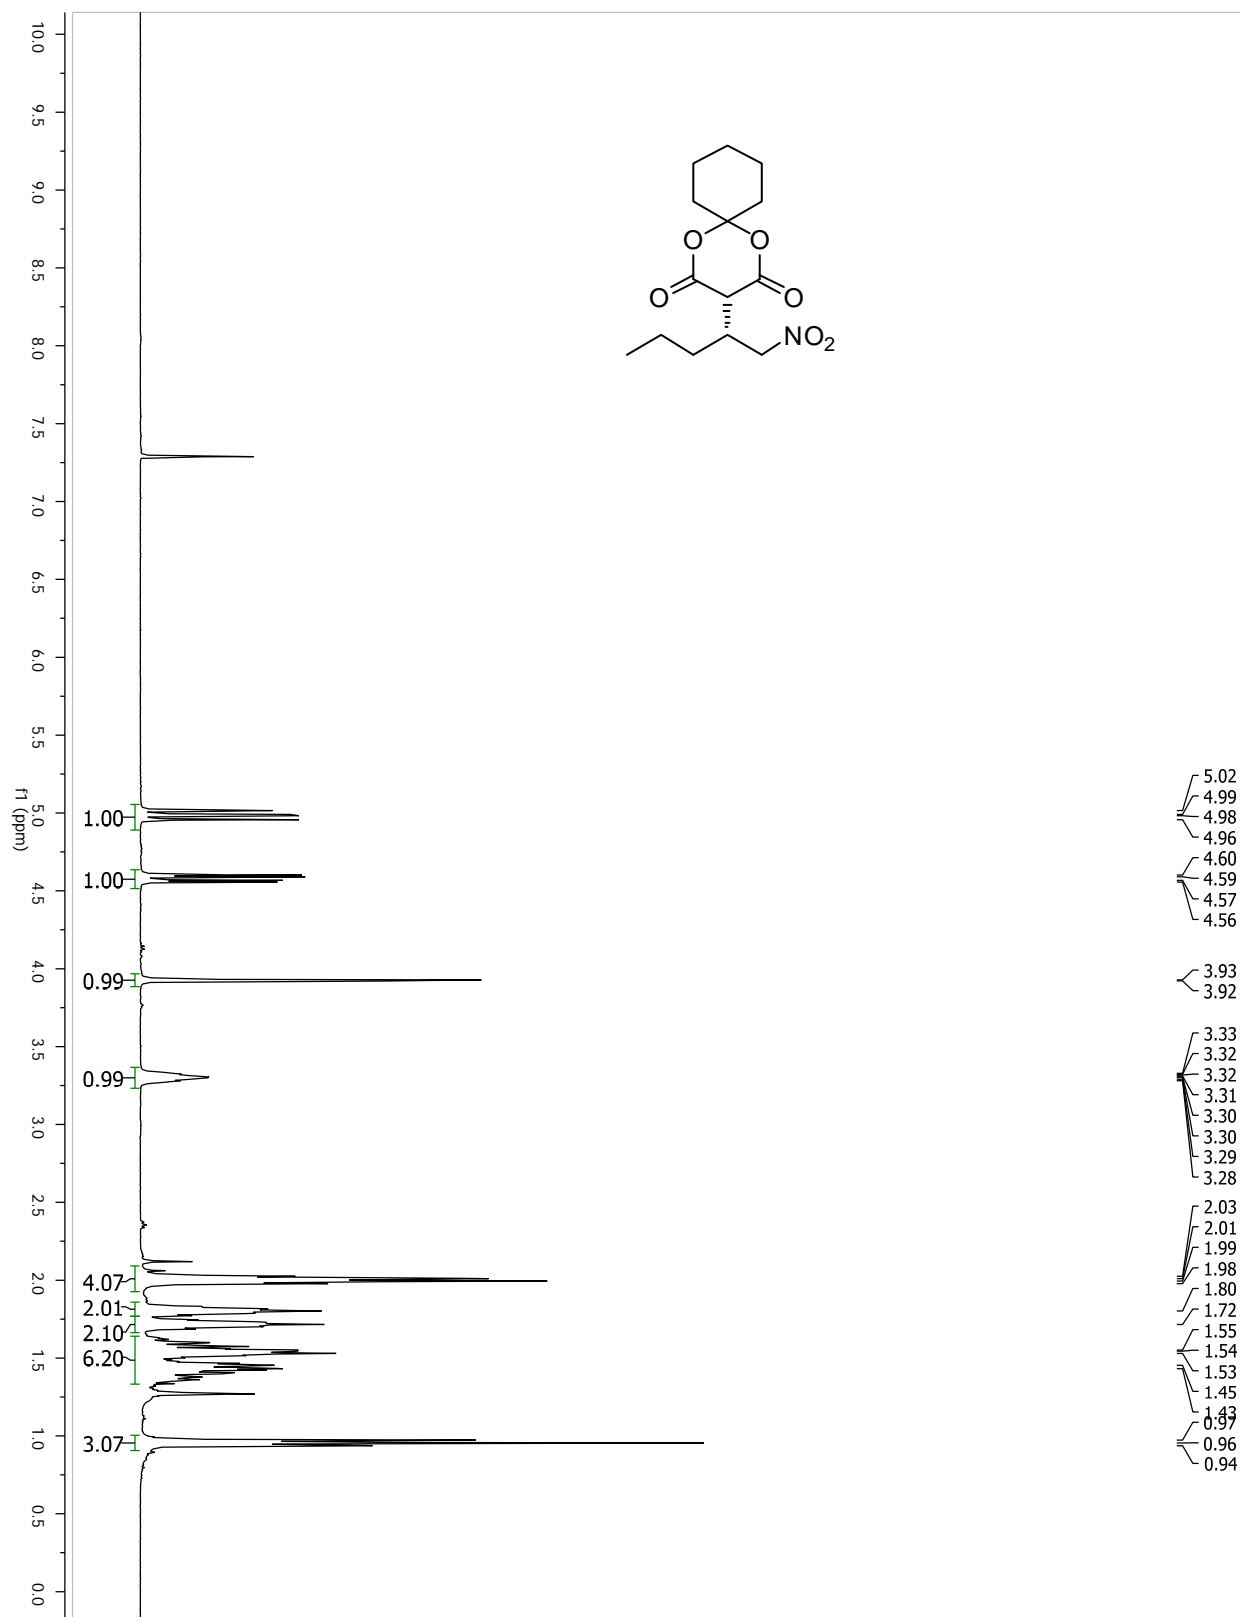

**12h:** (*R*)-3-(1-nitropentan-2-yl)-1,5-dioxaspiro[5.5]undecane-2,4-dione

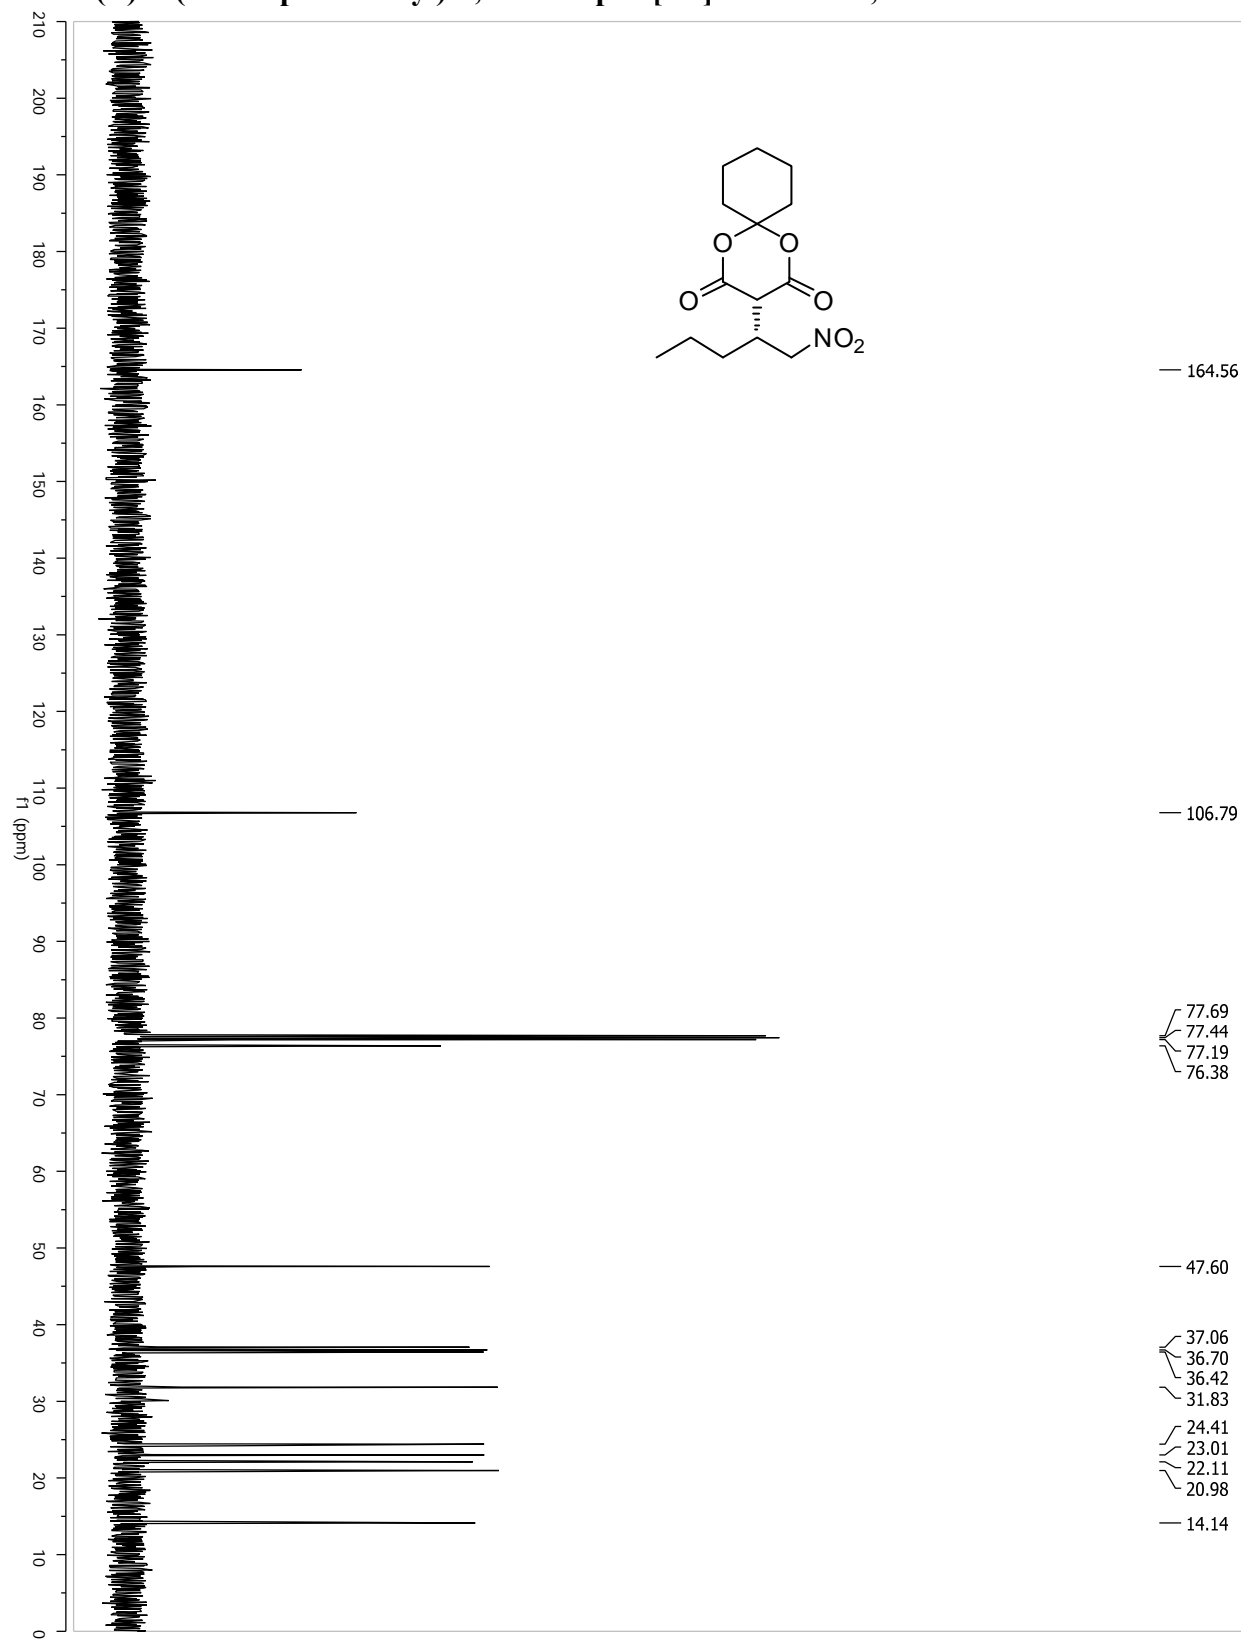

**12i: (R)-3-(1-cyclohexyl-2-nitroethyl)-1,5-dioxaspiro[5.5]undecane-2,4-dione**

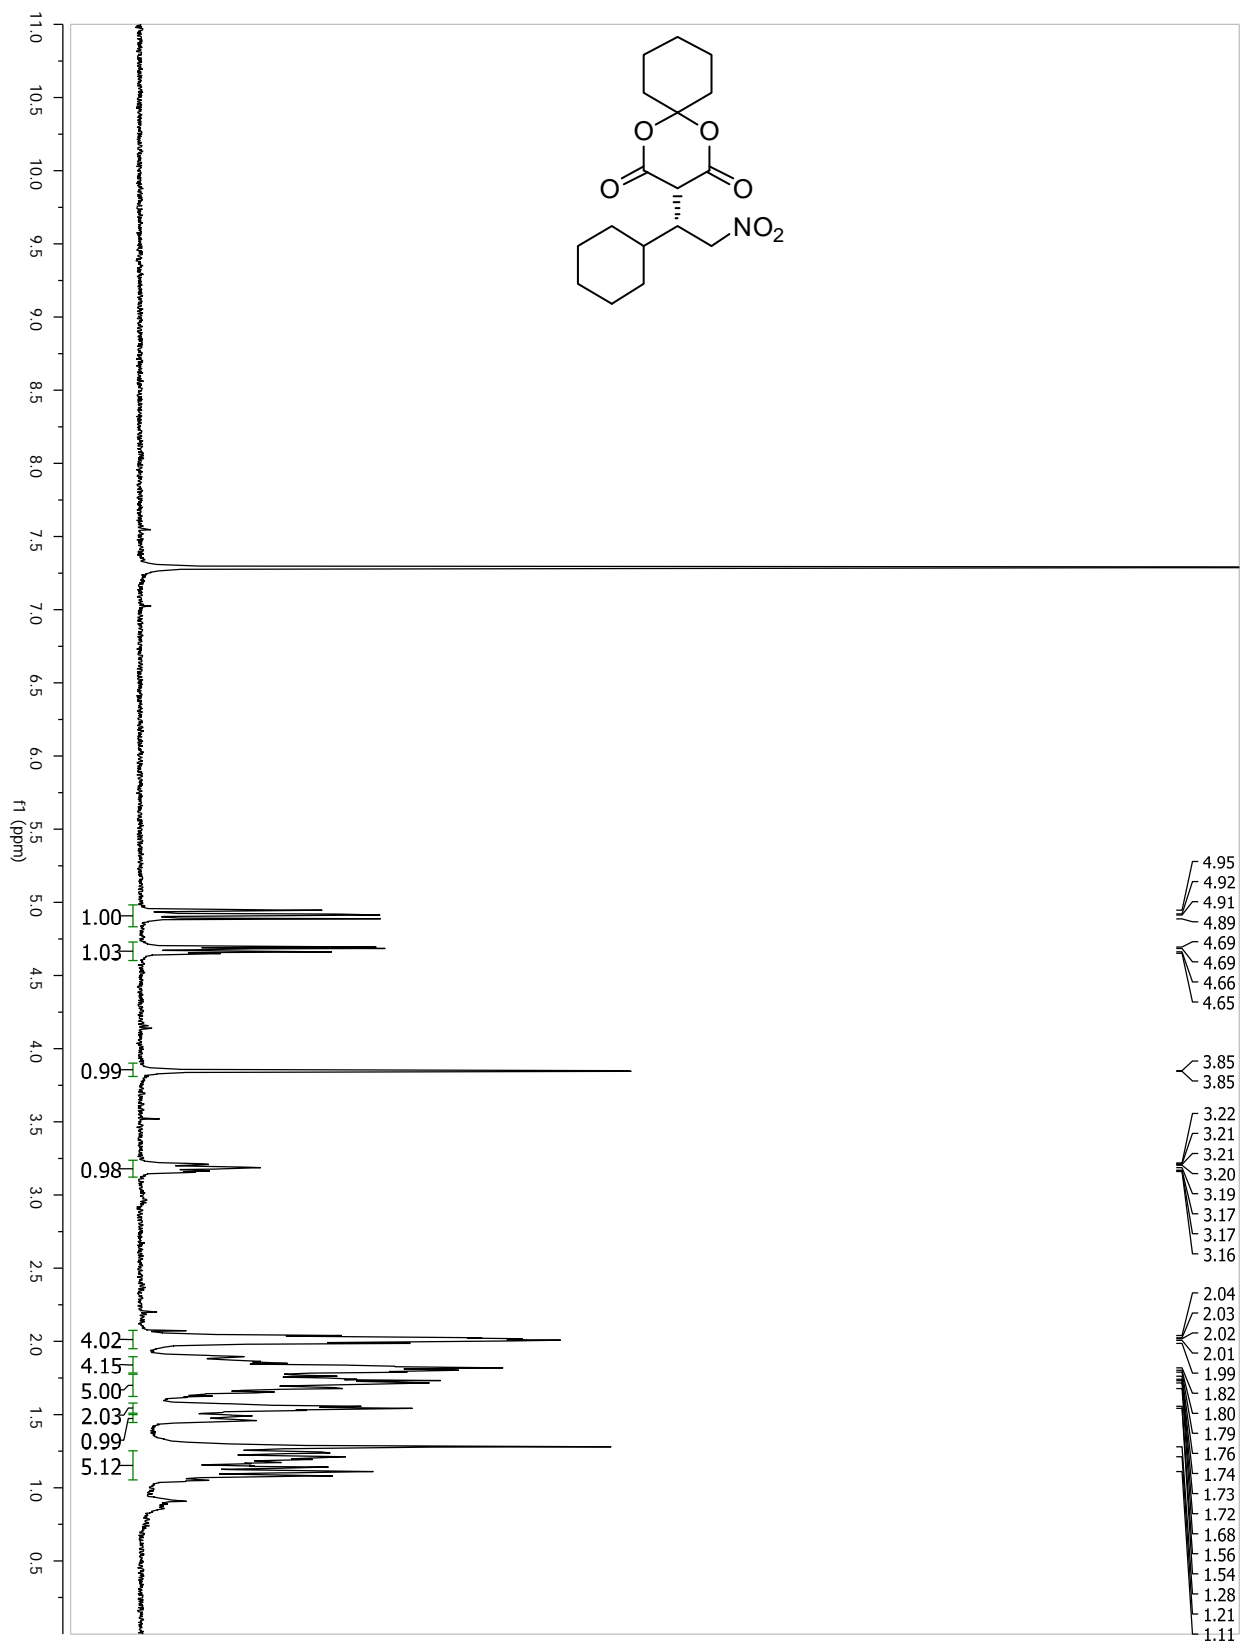

**12i: (R)-3-(1-cyclohexyl-2-nitroethyl)-1,5-dioxaspiro[5.5]undecane-2,4-dione**

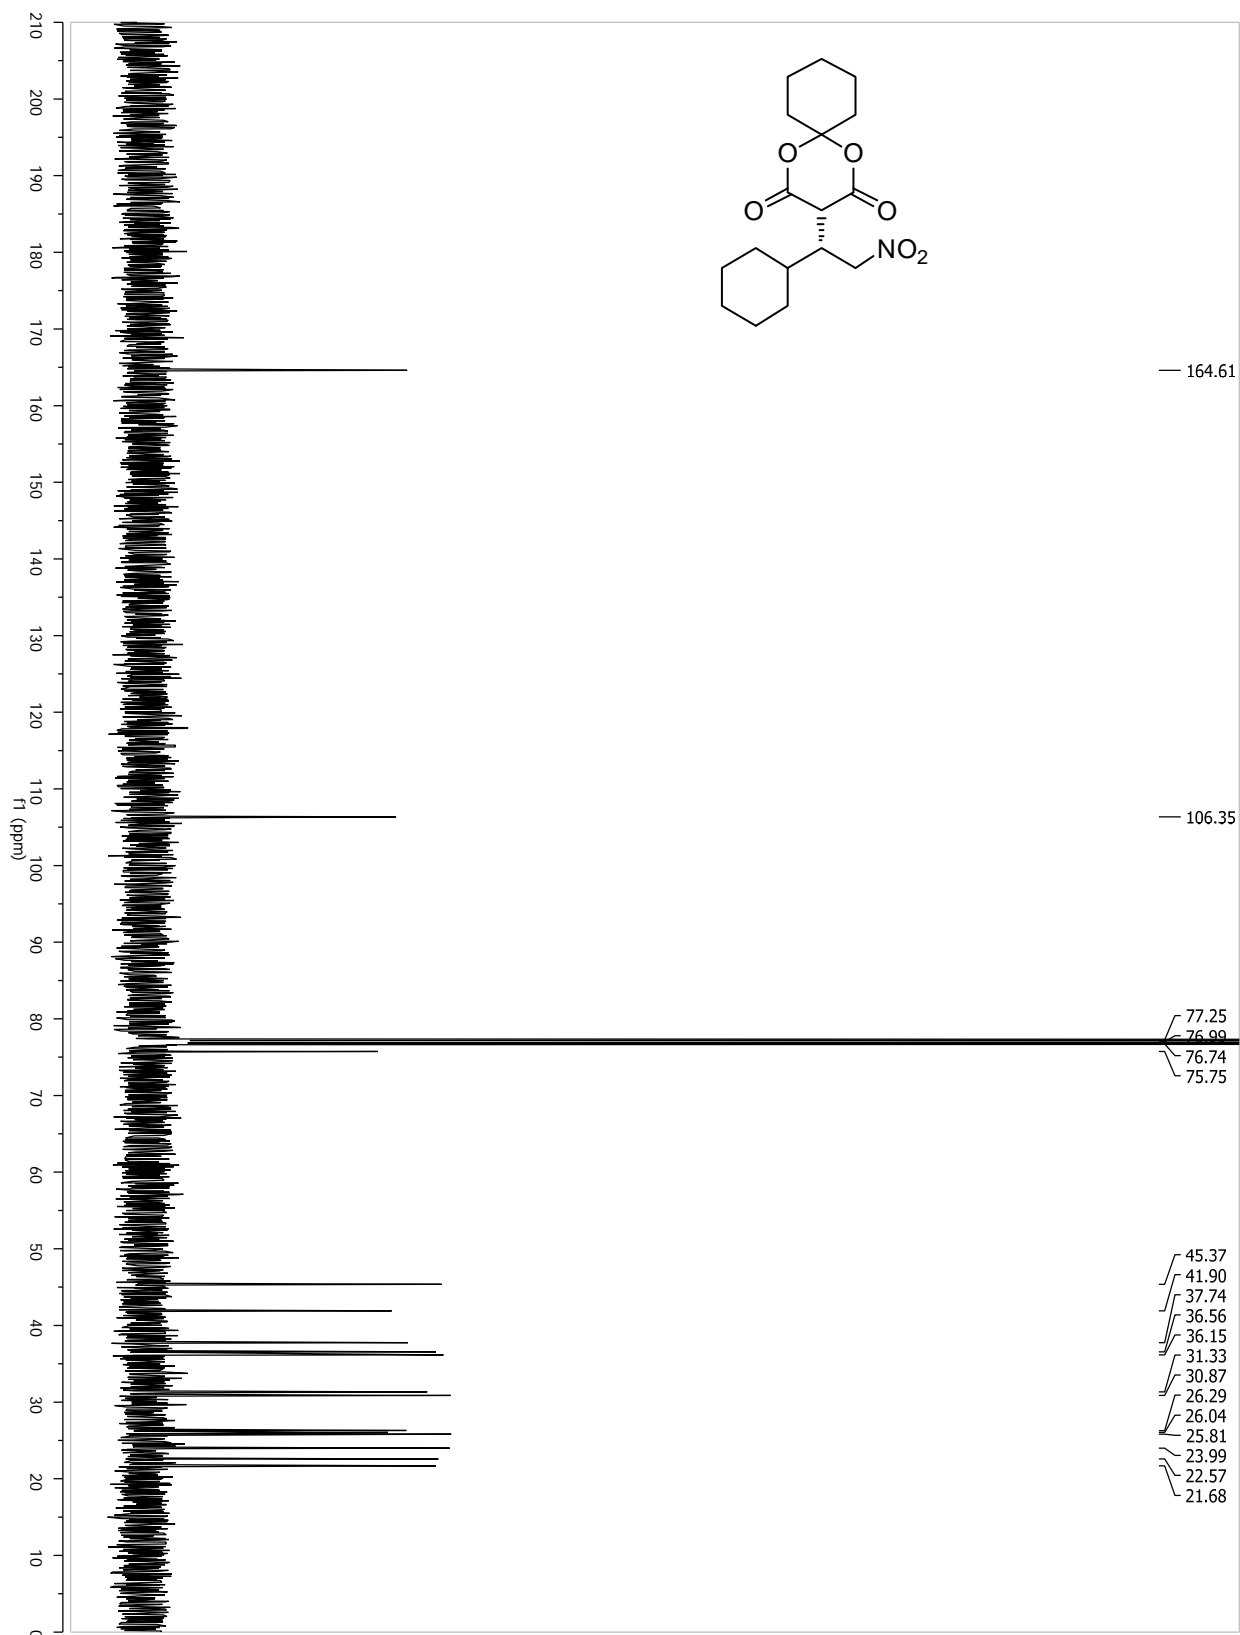

**14a: 3-((1R,2S)- (2-nitro-1-phenylpropyl)-1,5-dioxaspiro[5.5]undecane-2,4-dione**

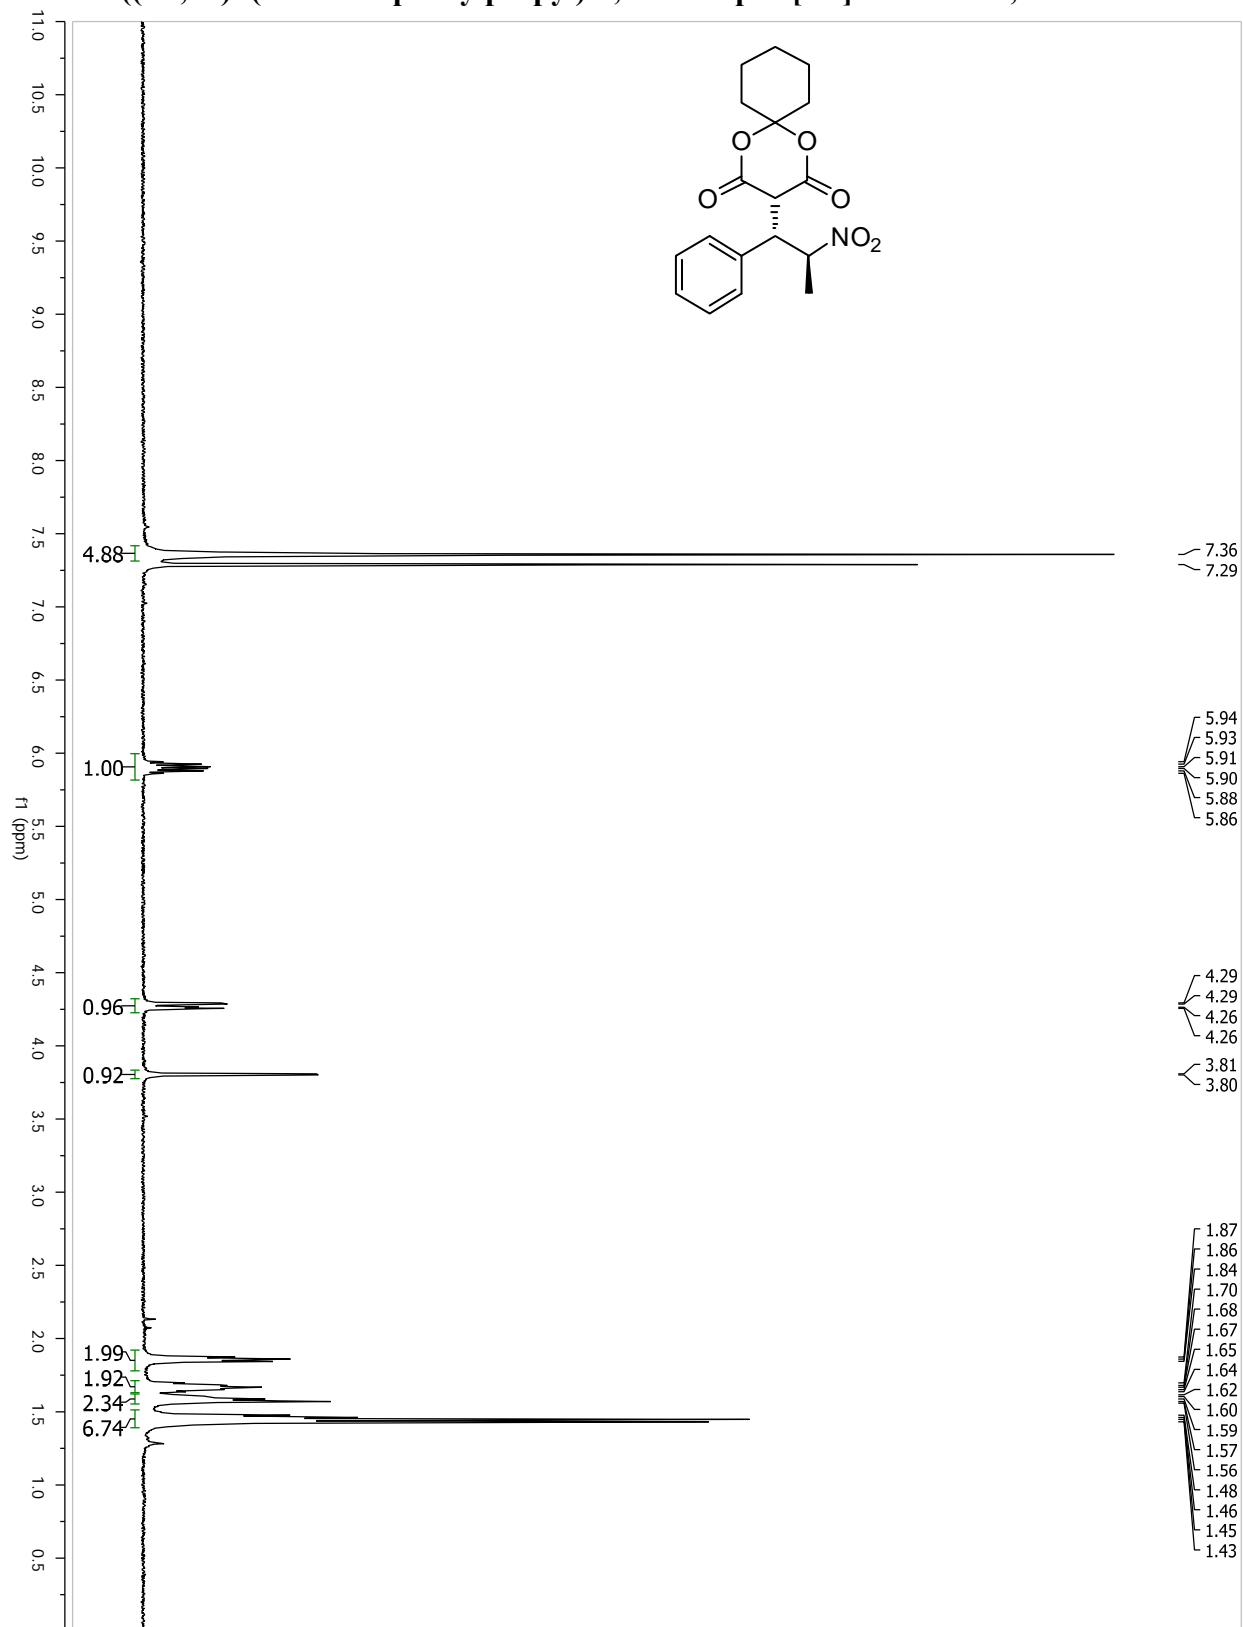

**14a: 3-((1R,2S)- (2-nitro-1-phenylpropyl)-1,5-dioxaspiro[5.5]undecane-2,4-dione**

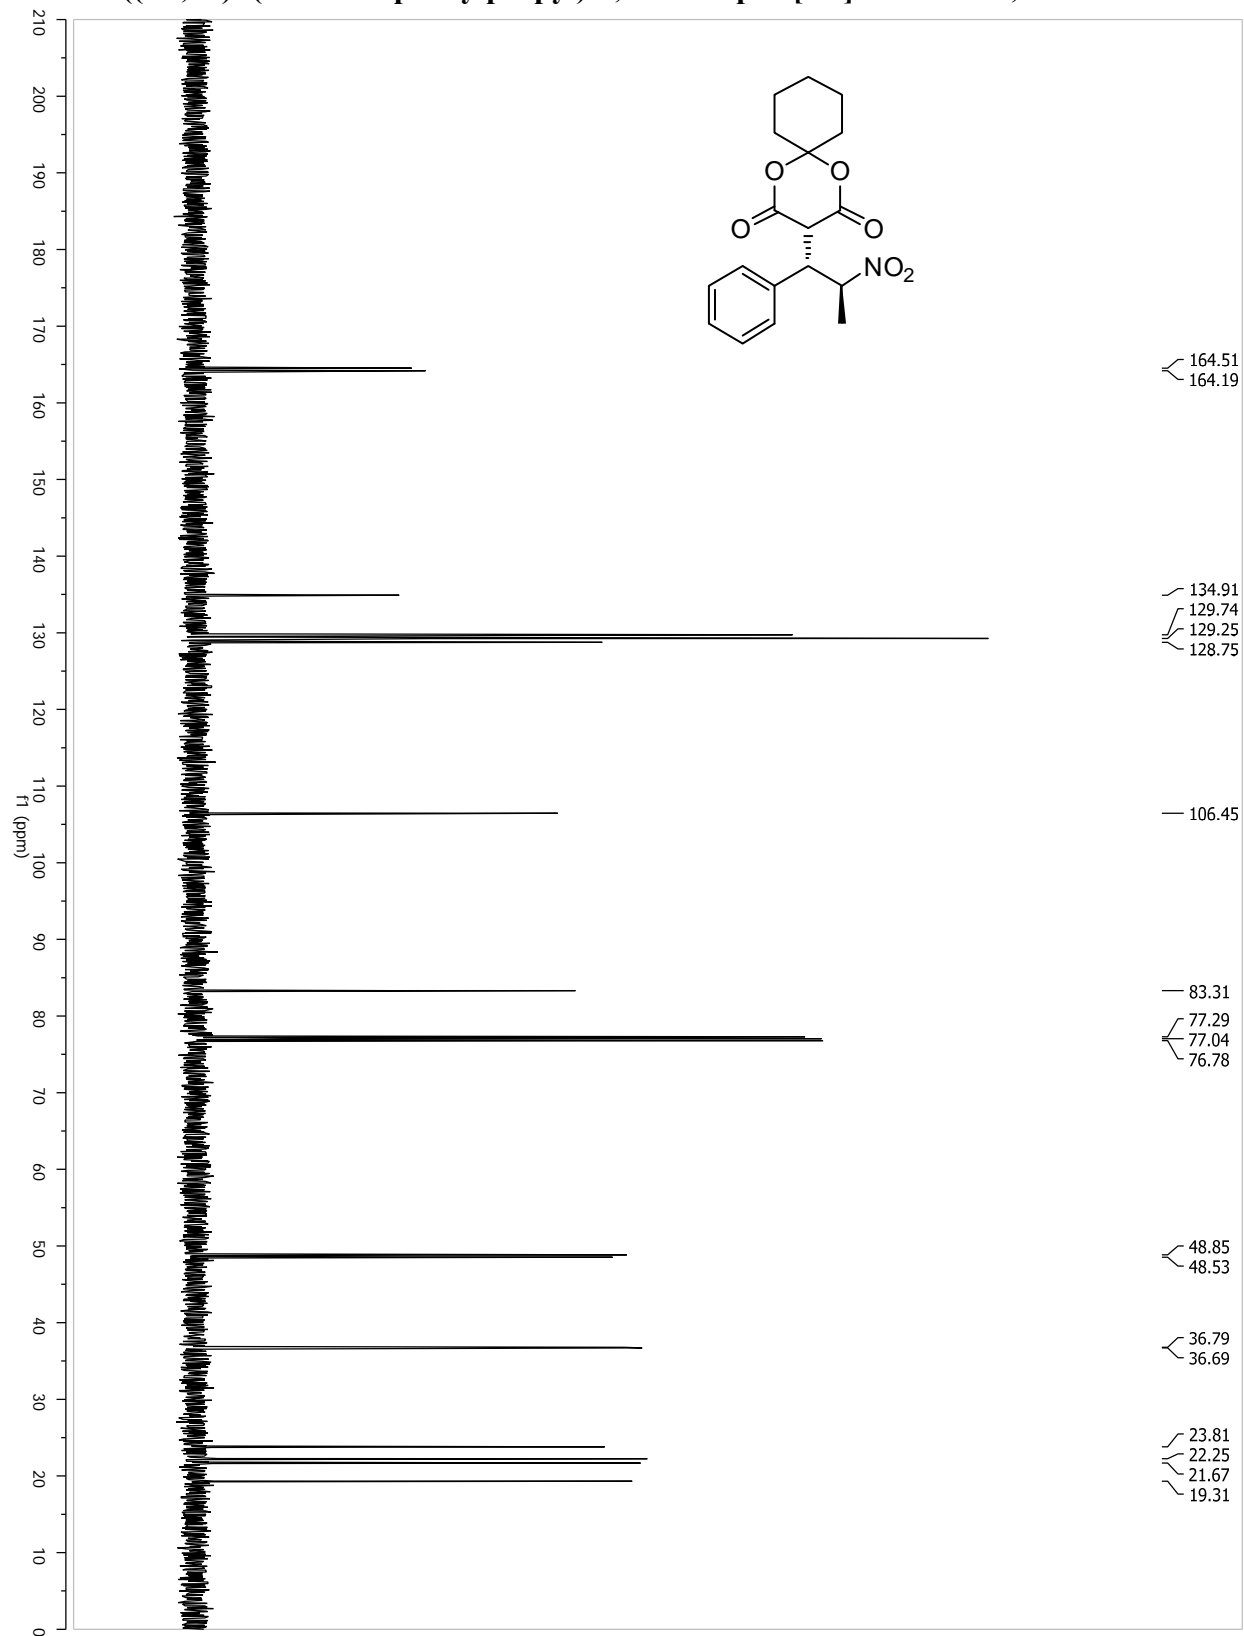

**14b: 3-((1*R*,2*S*)-2-nitro-1-(4-(trifluoromethyl)phenyl)propyl)-1,5-dioxaspiro[5.5]undecane-2,4-dione**

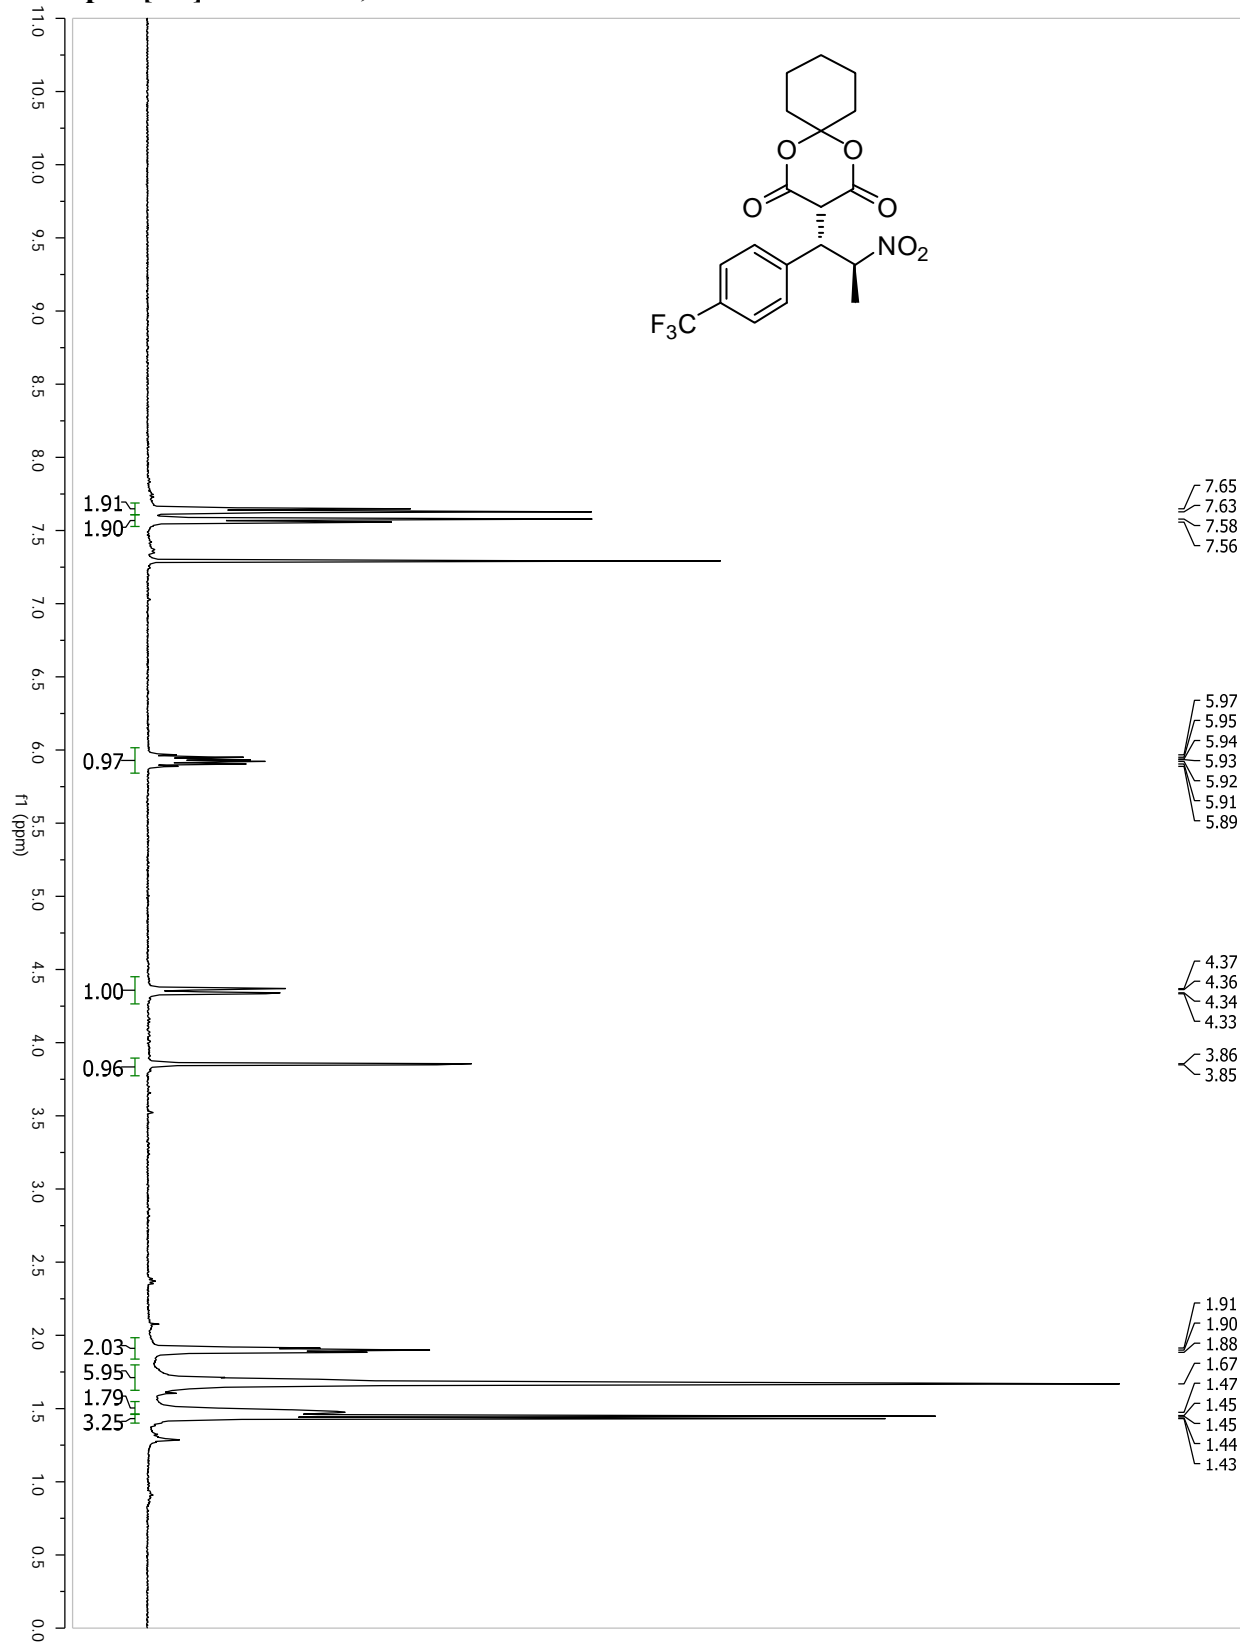

**14b: 3-((1R,2S)- (2-nitro-1-(4-(trifluoromethyl)phenyl)propyl)-1,5-dioxaspiro[5.5]undecane-2,4-dione**

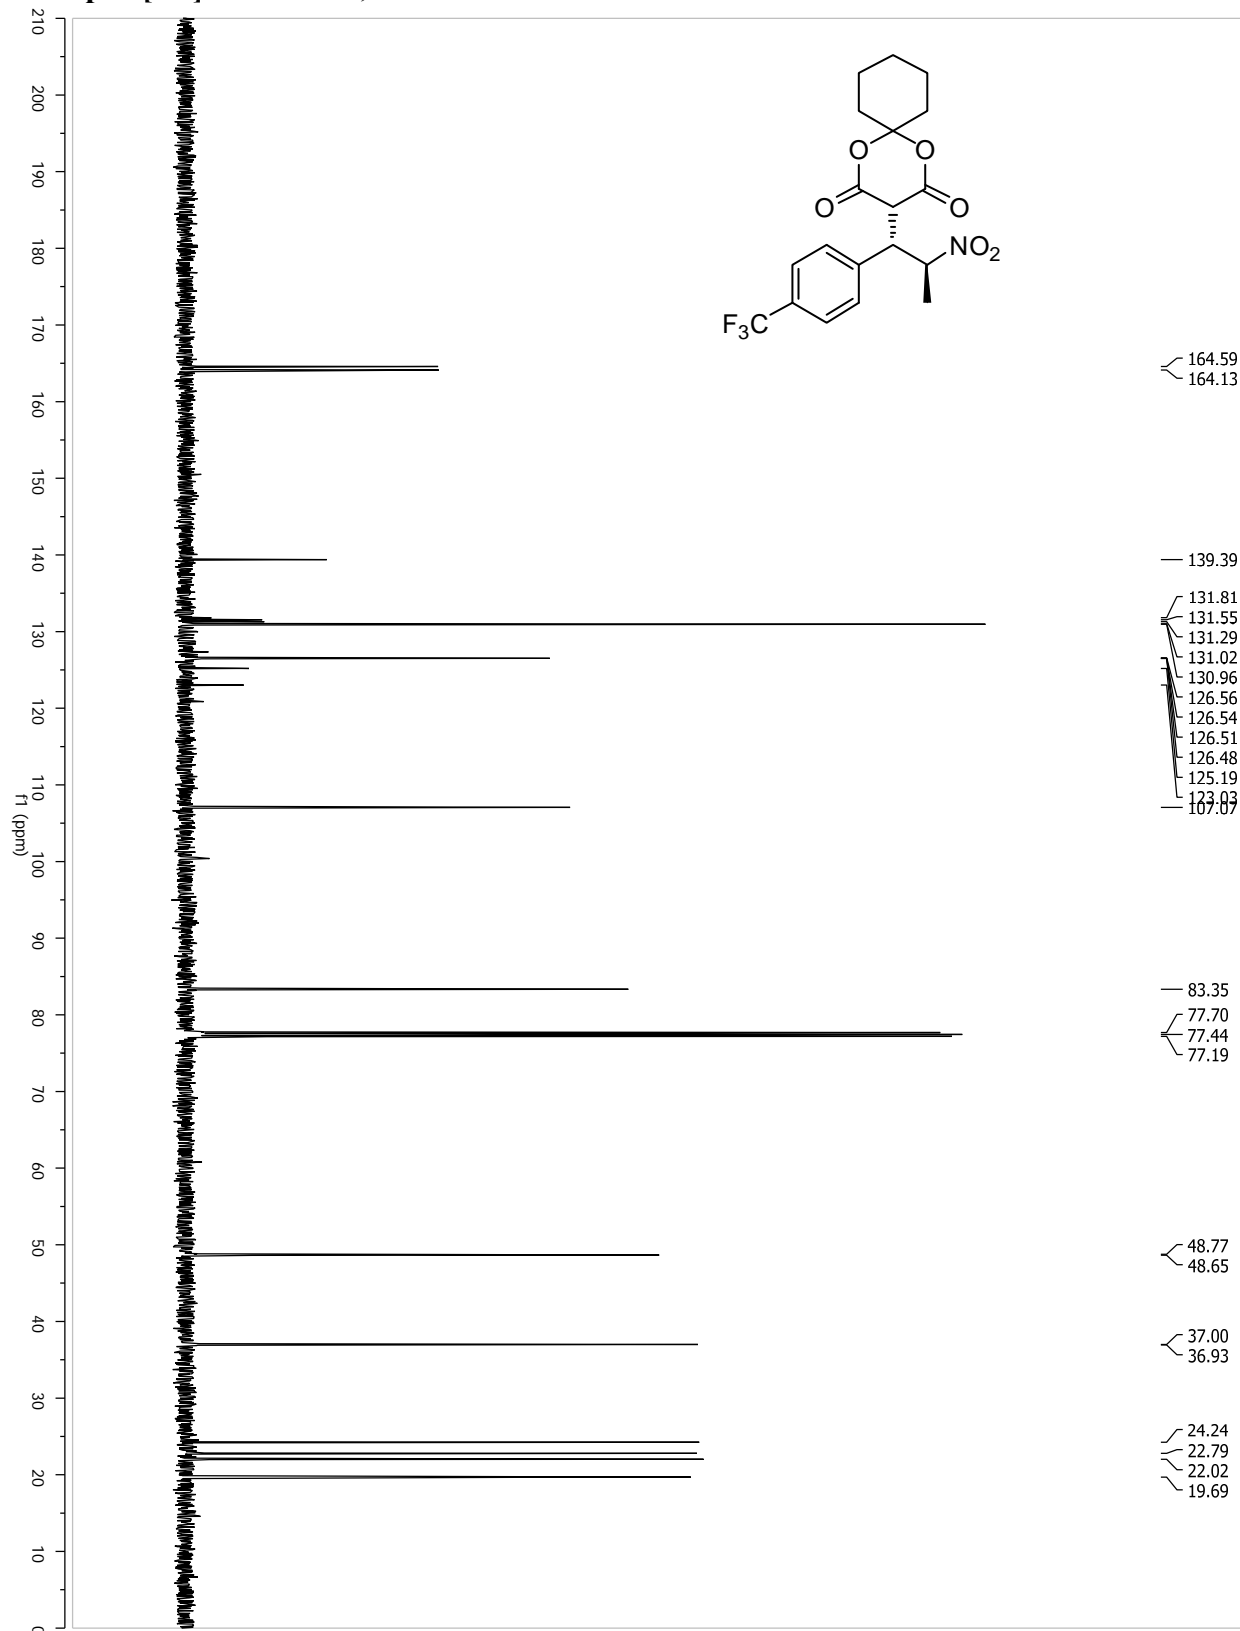



**14c: 3-((1*R*,2*S*)- (1-(4-methoxyphenyl)-2-nitropropyl)-1,5-dioxaspiro[5.5]undecane-2,4-dione**

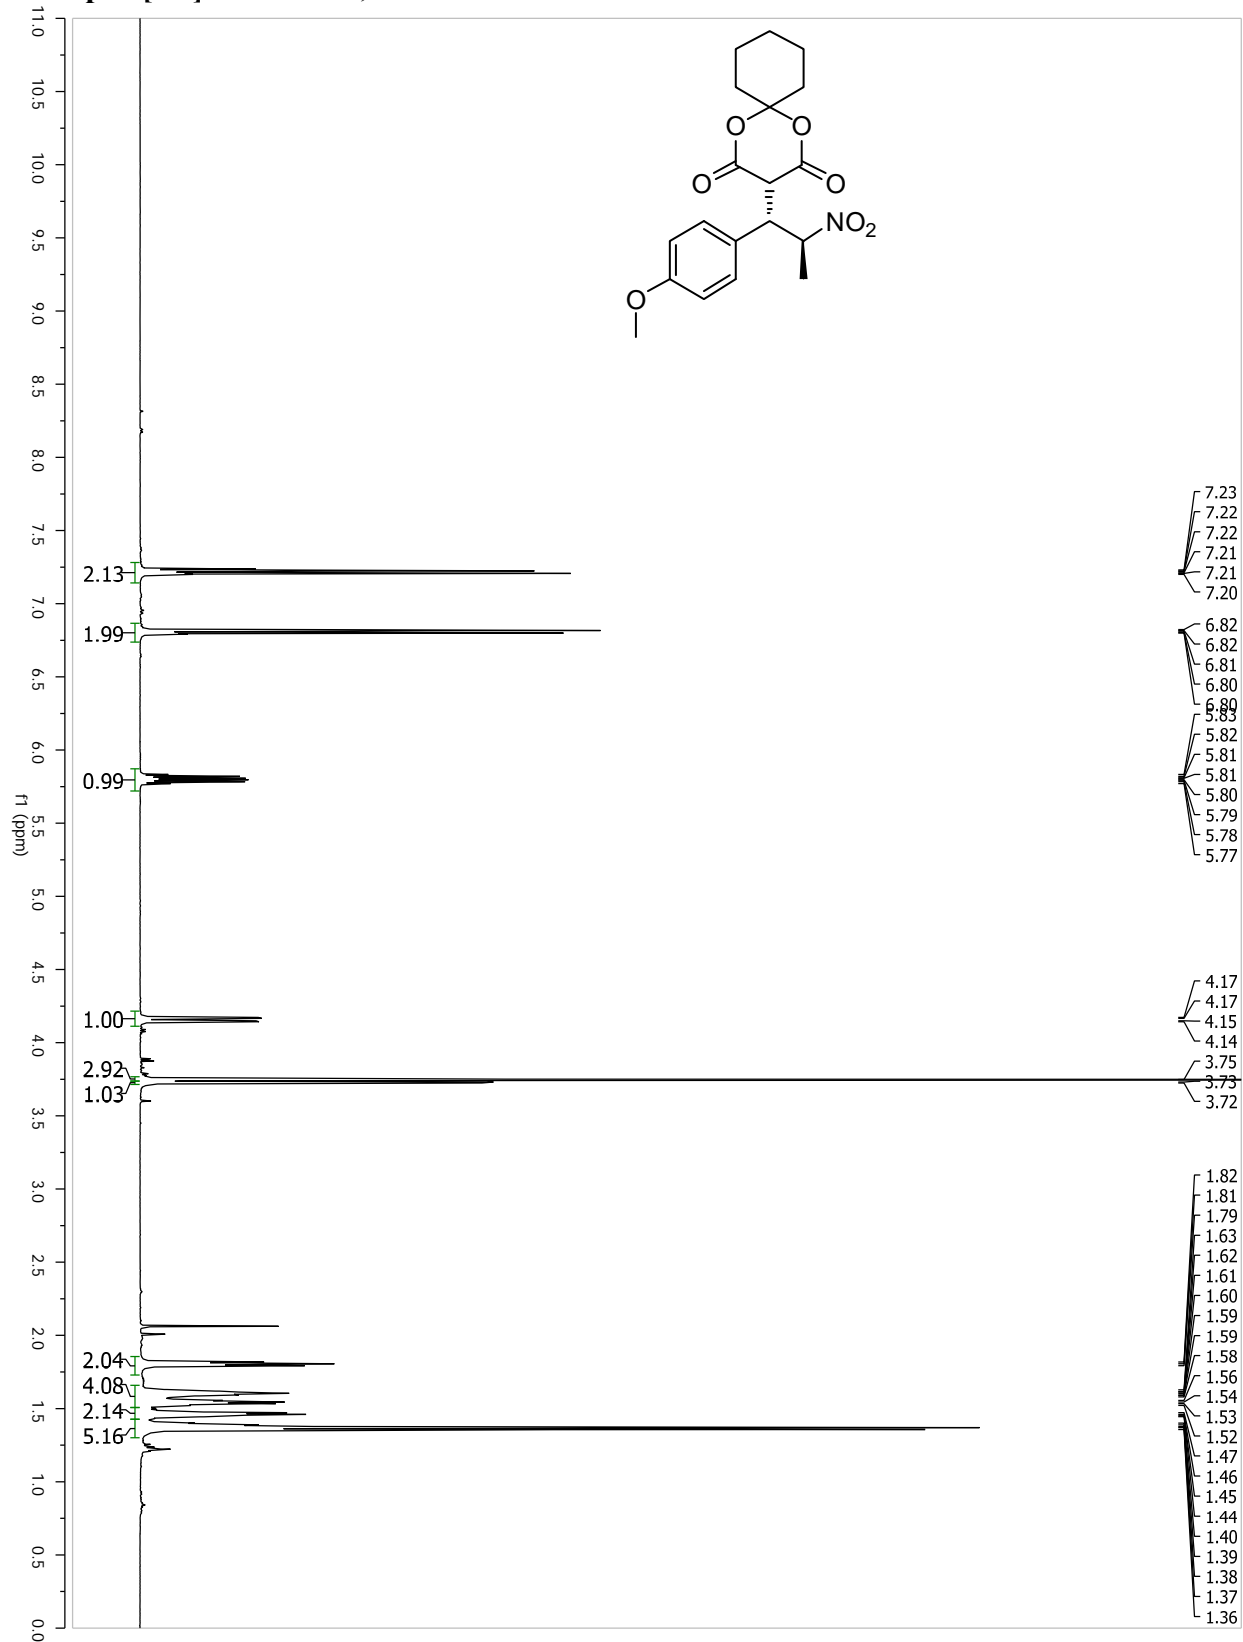

**14c: 3-((1*R*,2*S*)- (1-(4-methoxyphenyl)-2-nitropropyl)-1,5-dioxaspiro[5.5]undecane-2,4-dione**

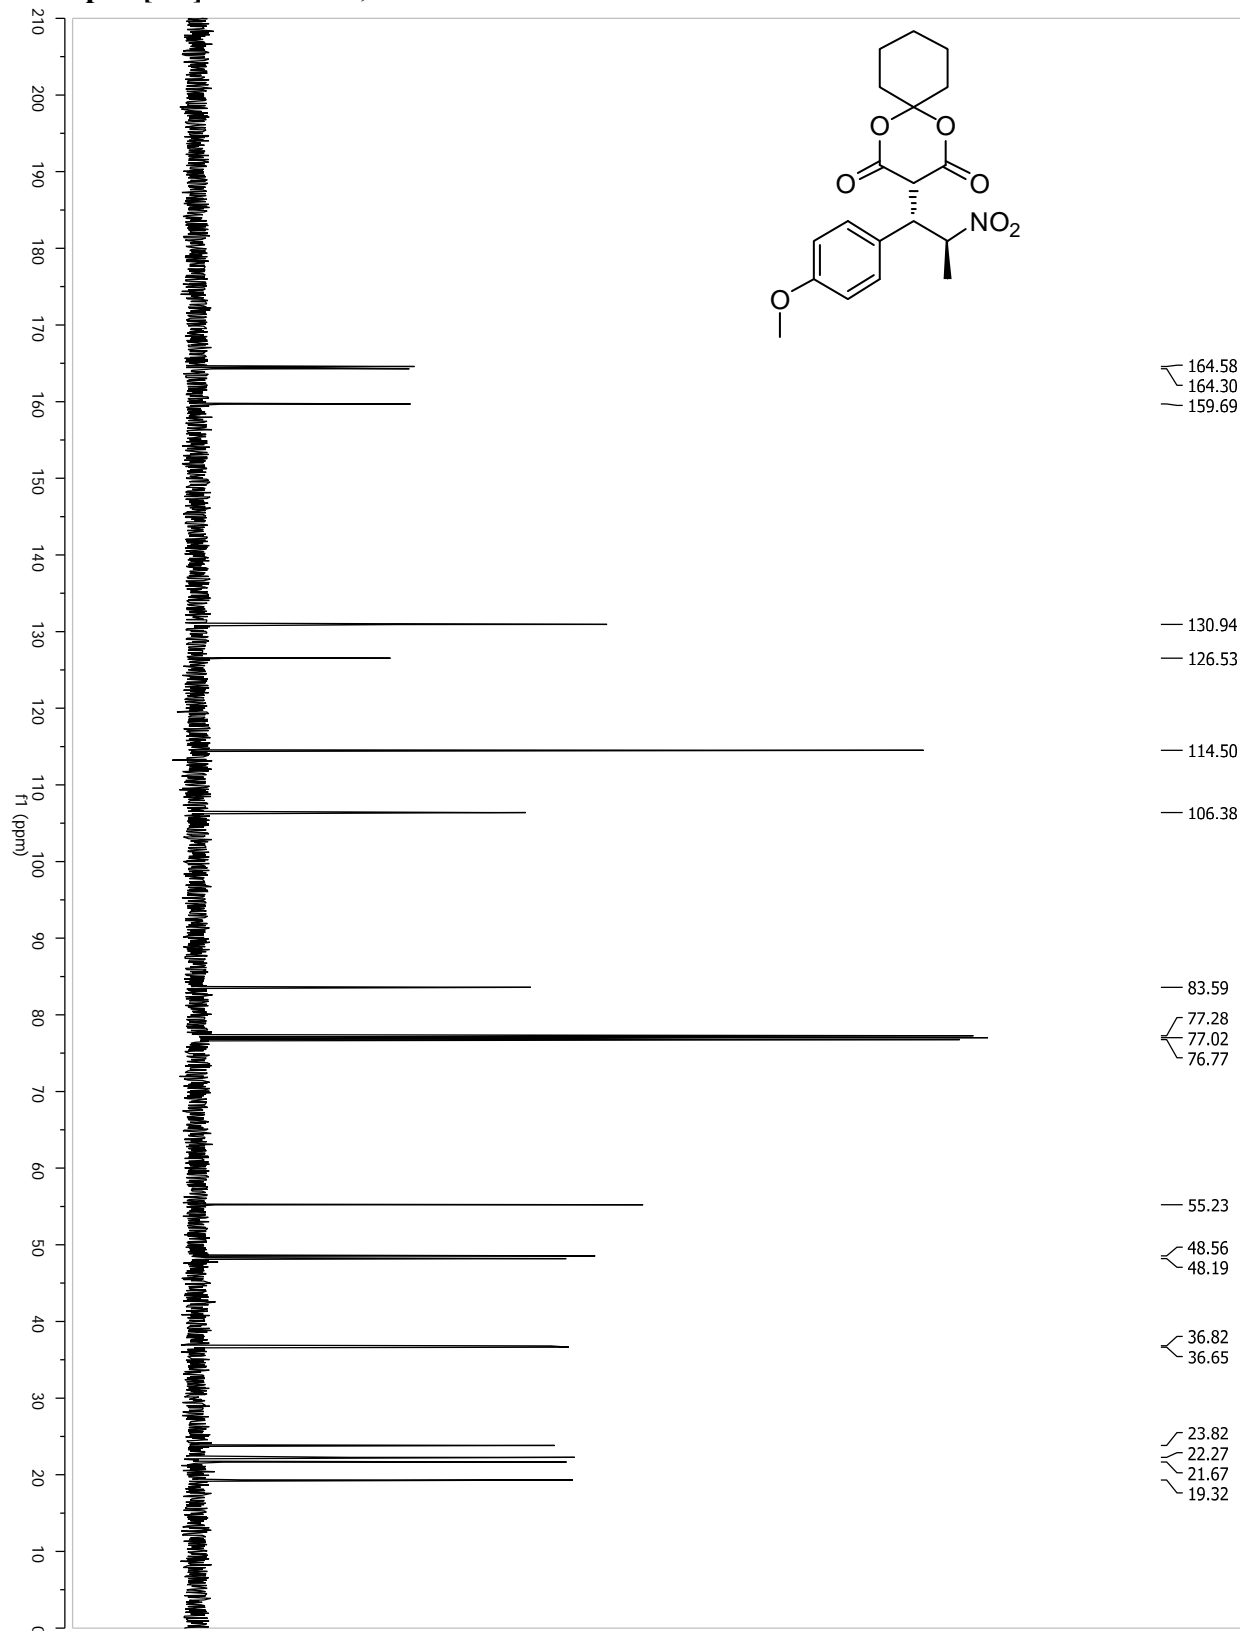

**14d: 3-((1*R*,2*S*)- (1-(4-chlorophenyl)-2-nitropropyl)-1,5-dioxaspiro[5.5]undecane-2,4-dione**

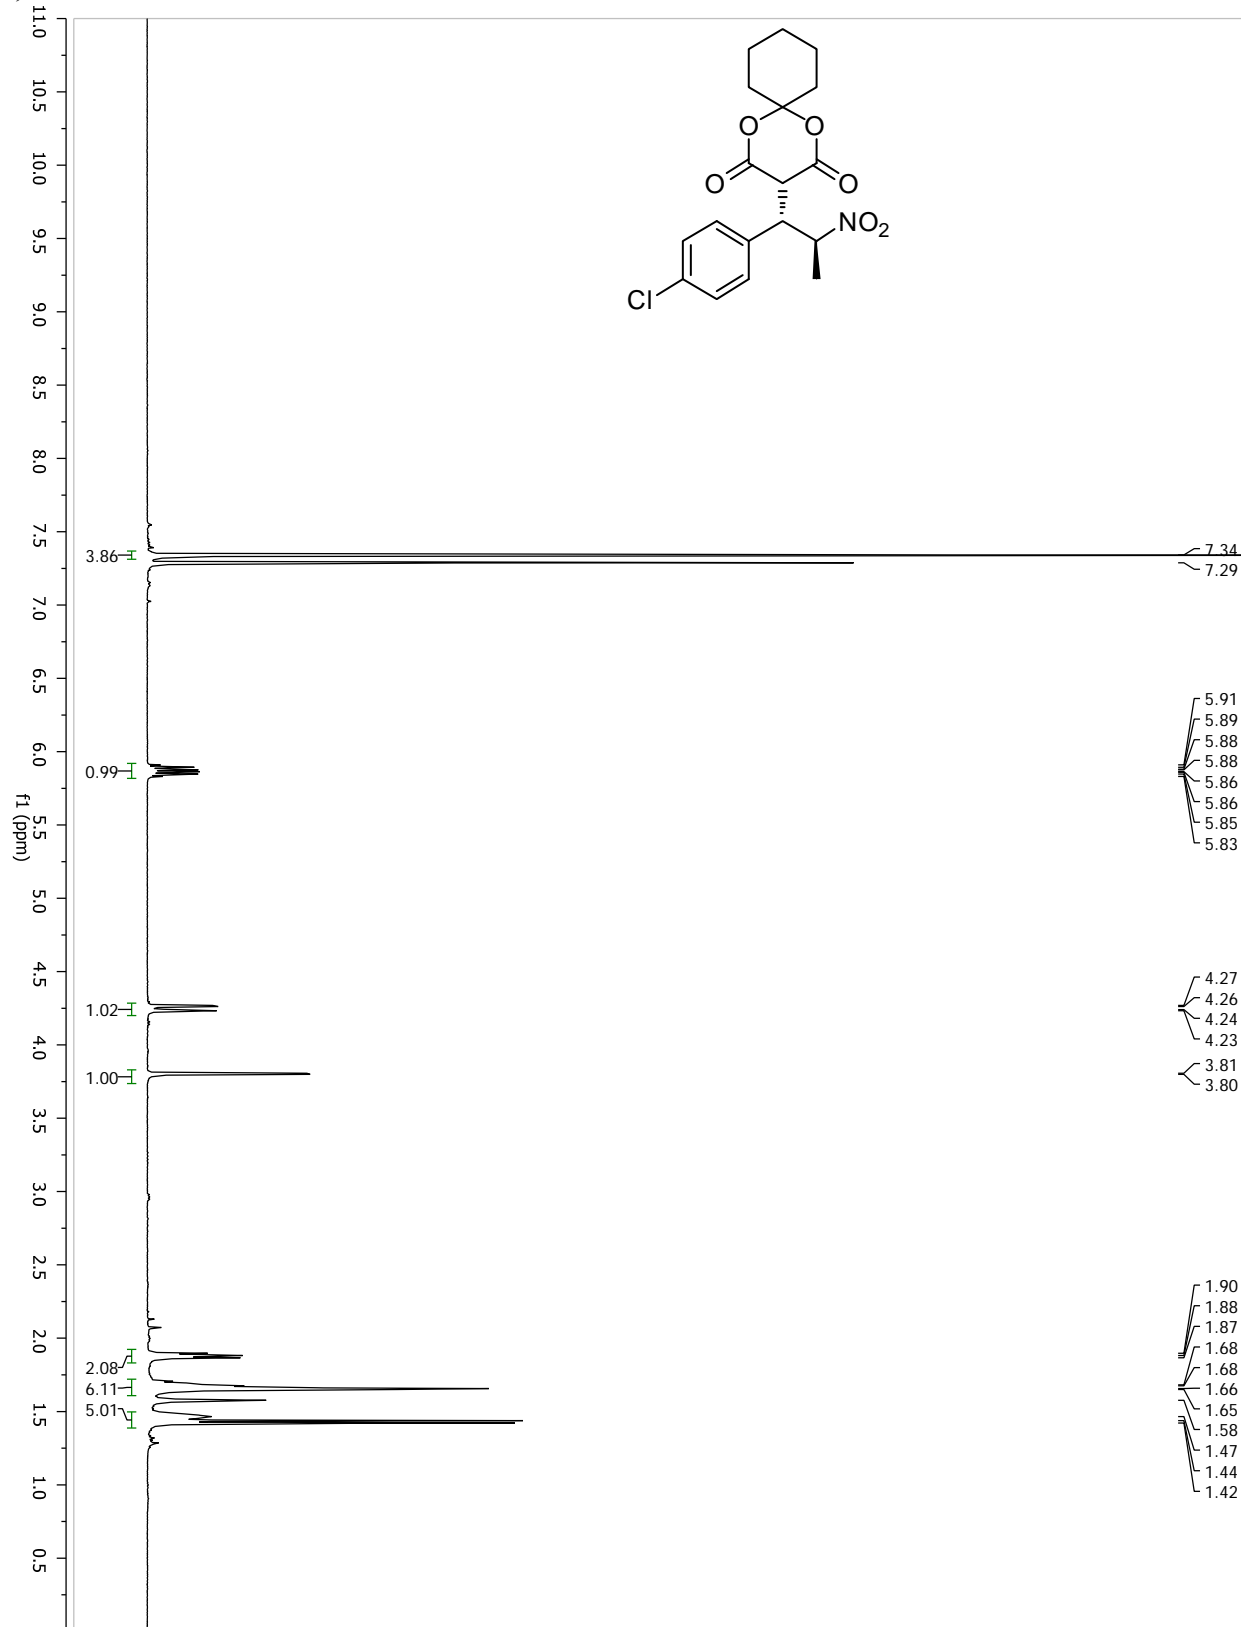

**14d: 3-((1R,2S)- (1-(4-chlorophenyl)-2-nitropropyl)-1,5-dioxaspiro[5.5]undecane-2,4-dione**

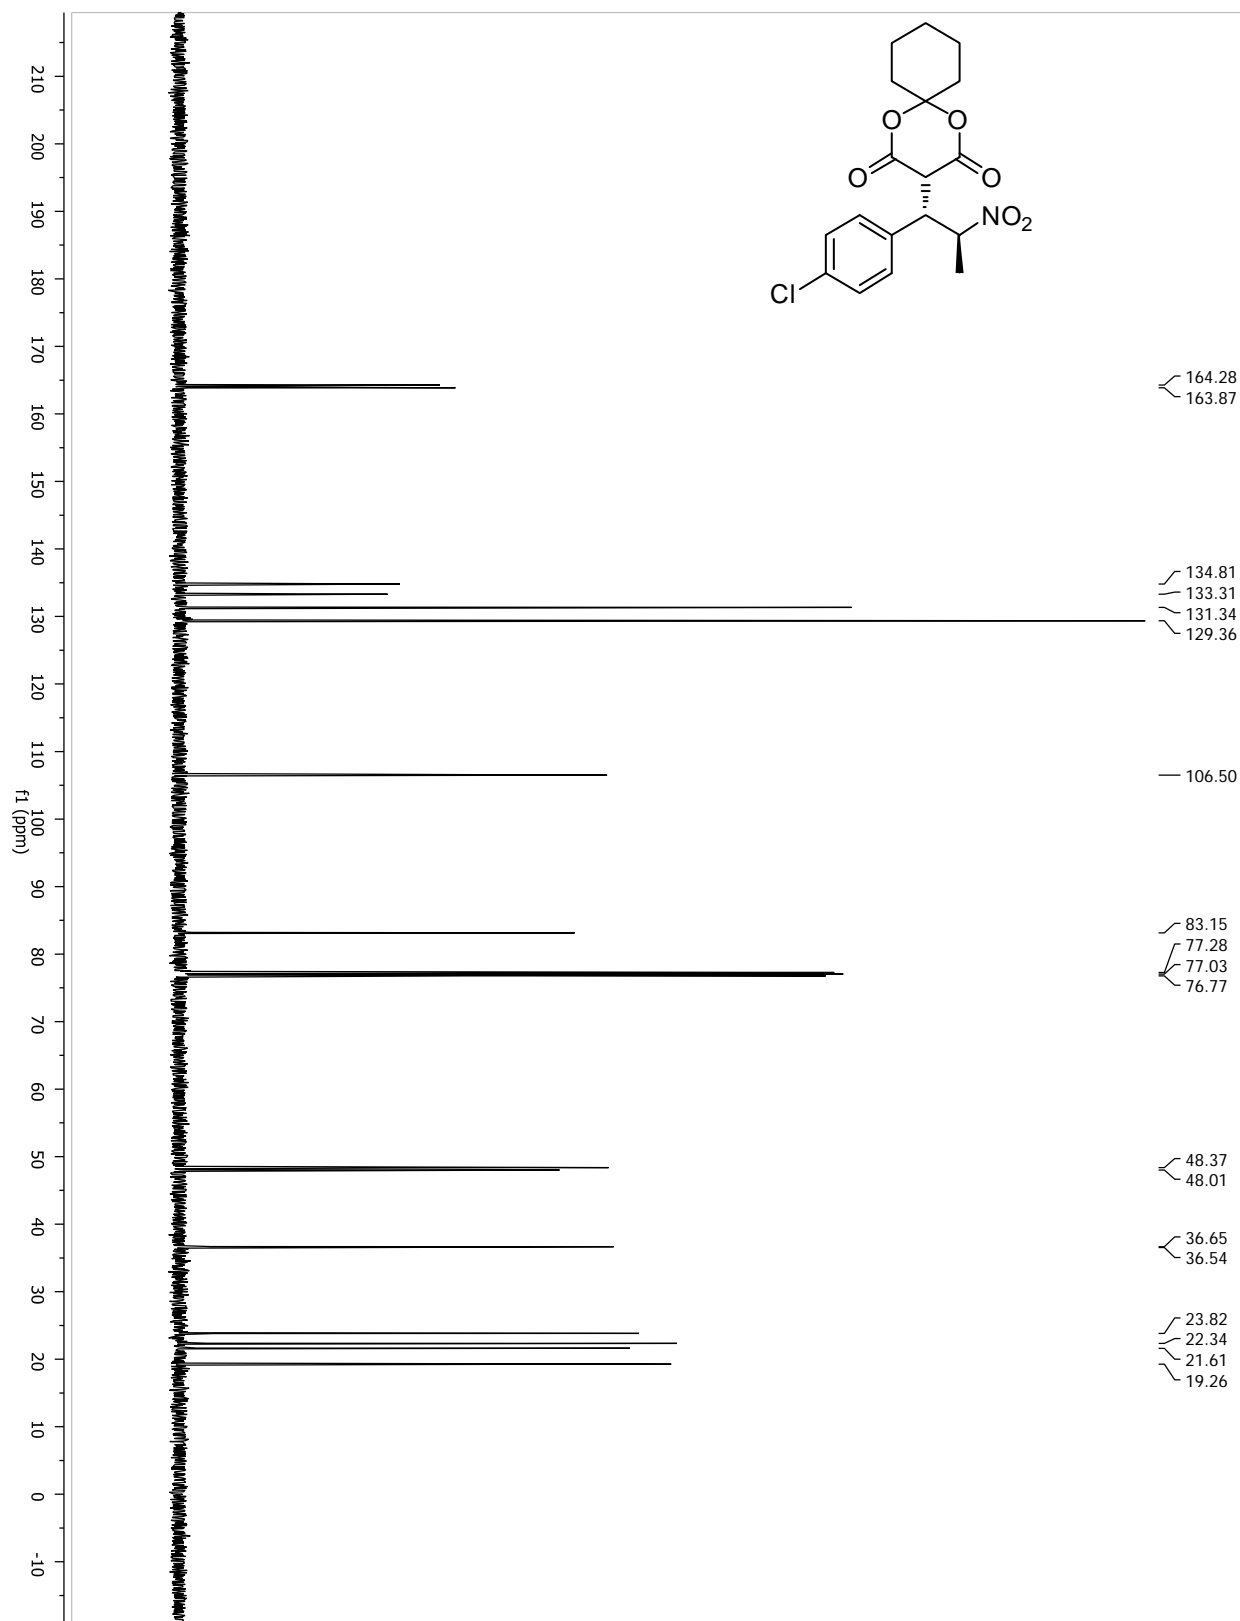

**14e: 3-((1*R*,2*S*)- (1-(4-methylphenyl)-2-nitropropyl)-1,5-dioxaspiro[5.5]undecane-2,4-dione**

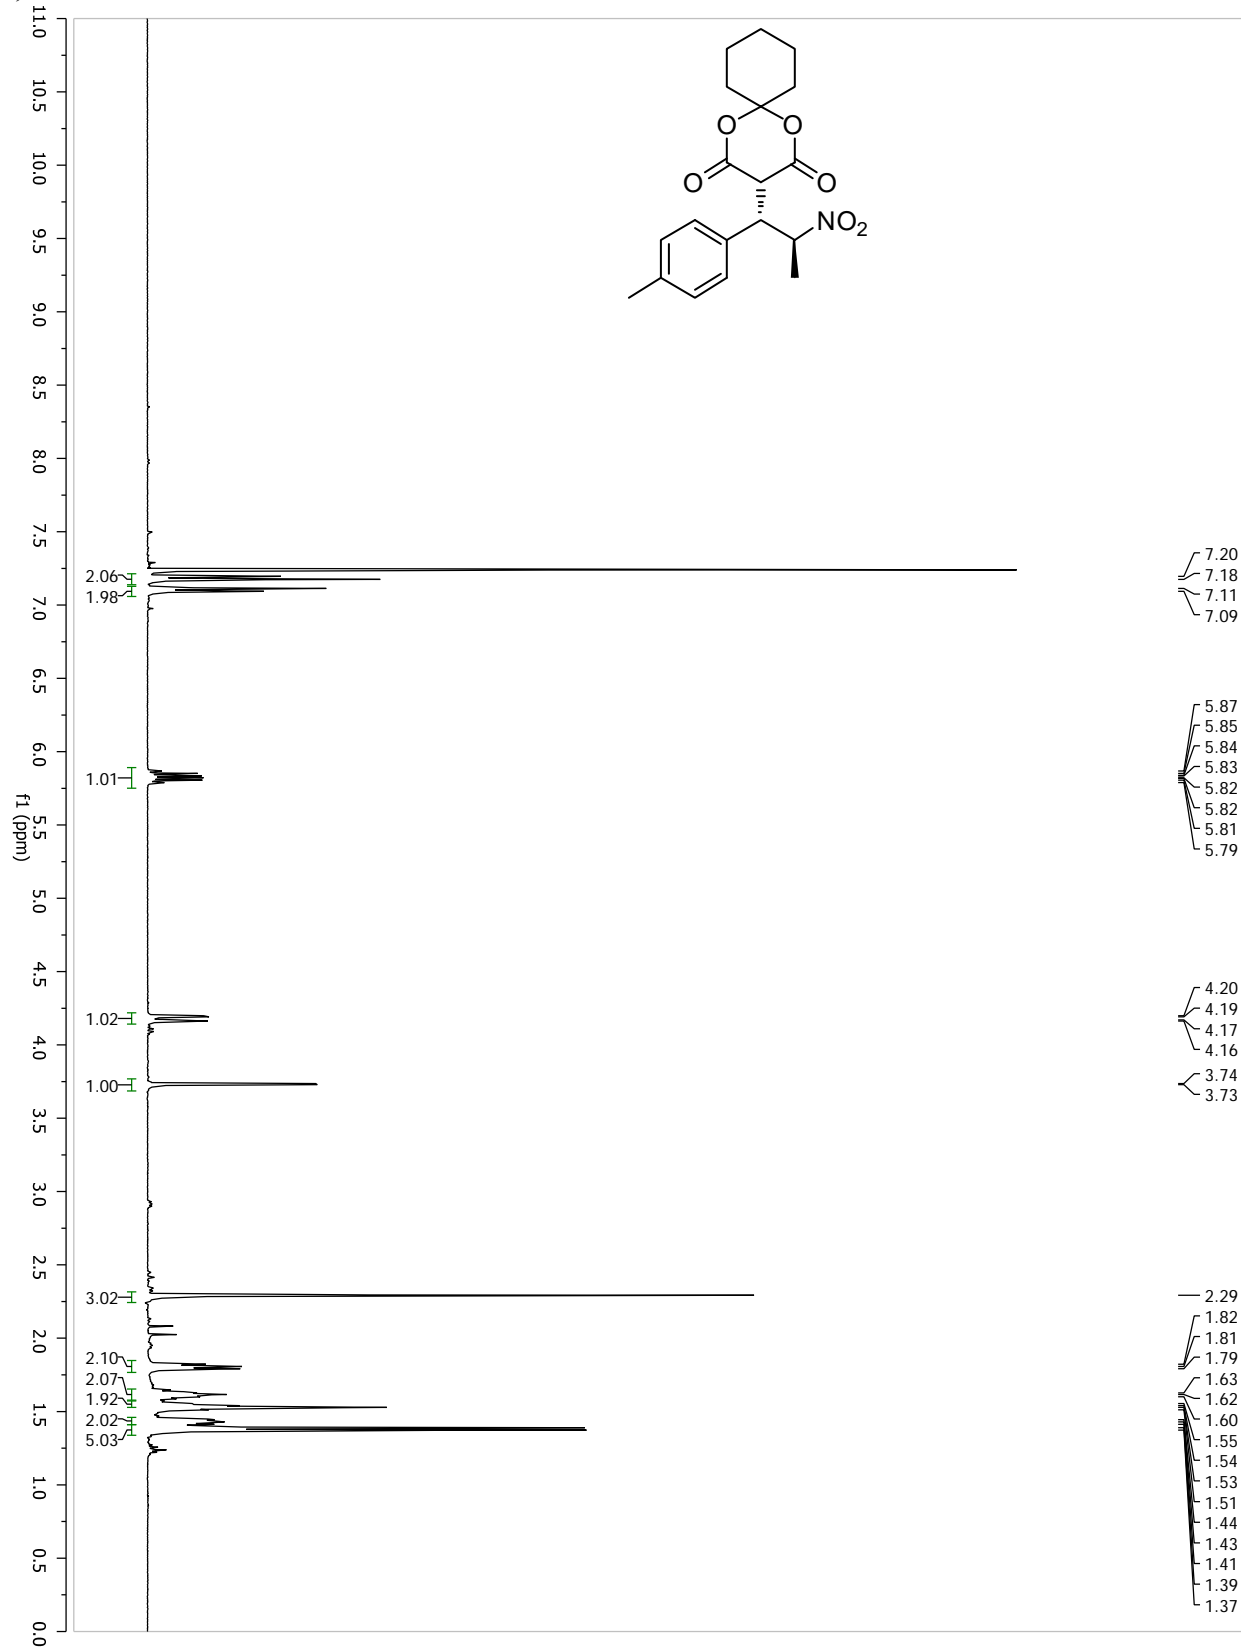

**14e: 3-((1R,2S)- (1-(4-methylphenyl)-2-nitropropyl)-1,5-dioxaspiro[5.5]undecane-2,4-dione**

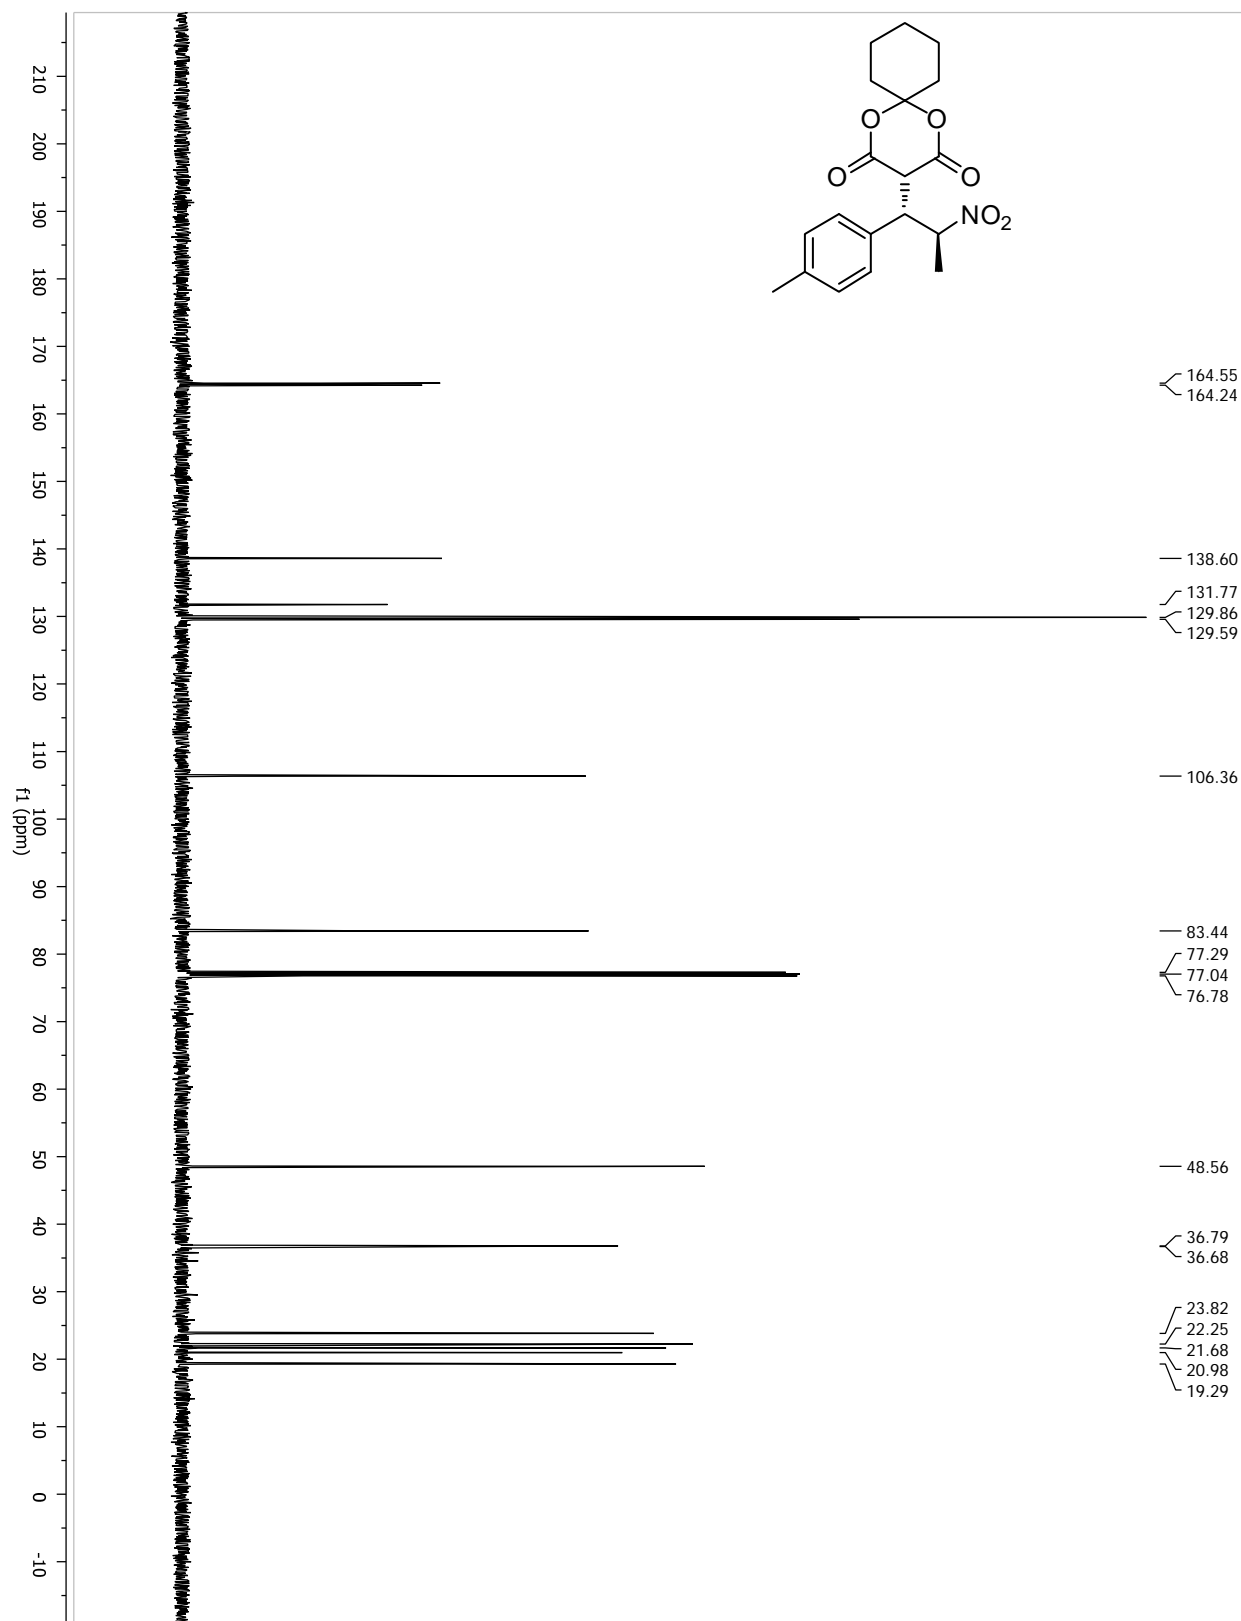

**14f: 3-((1R,2S)-(3-phenyl-2-nitro-1-phenylpropyl)-1,5-dioxaspiro[5.5]undecane-2,4-dione**

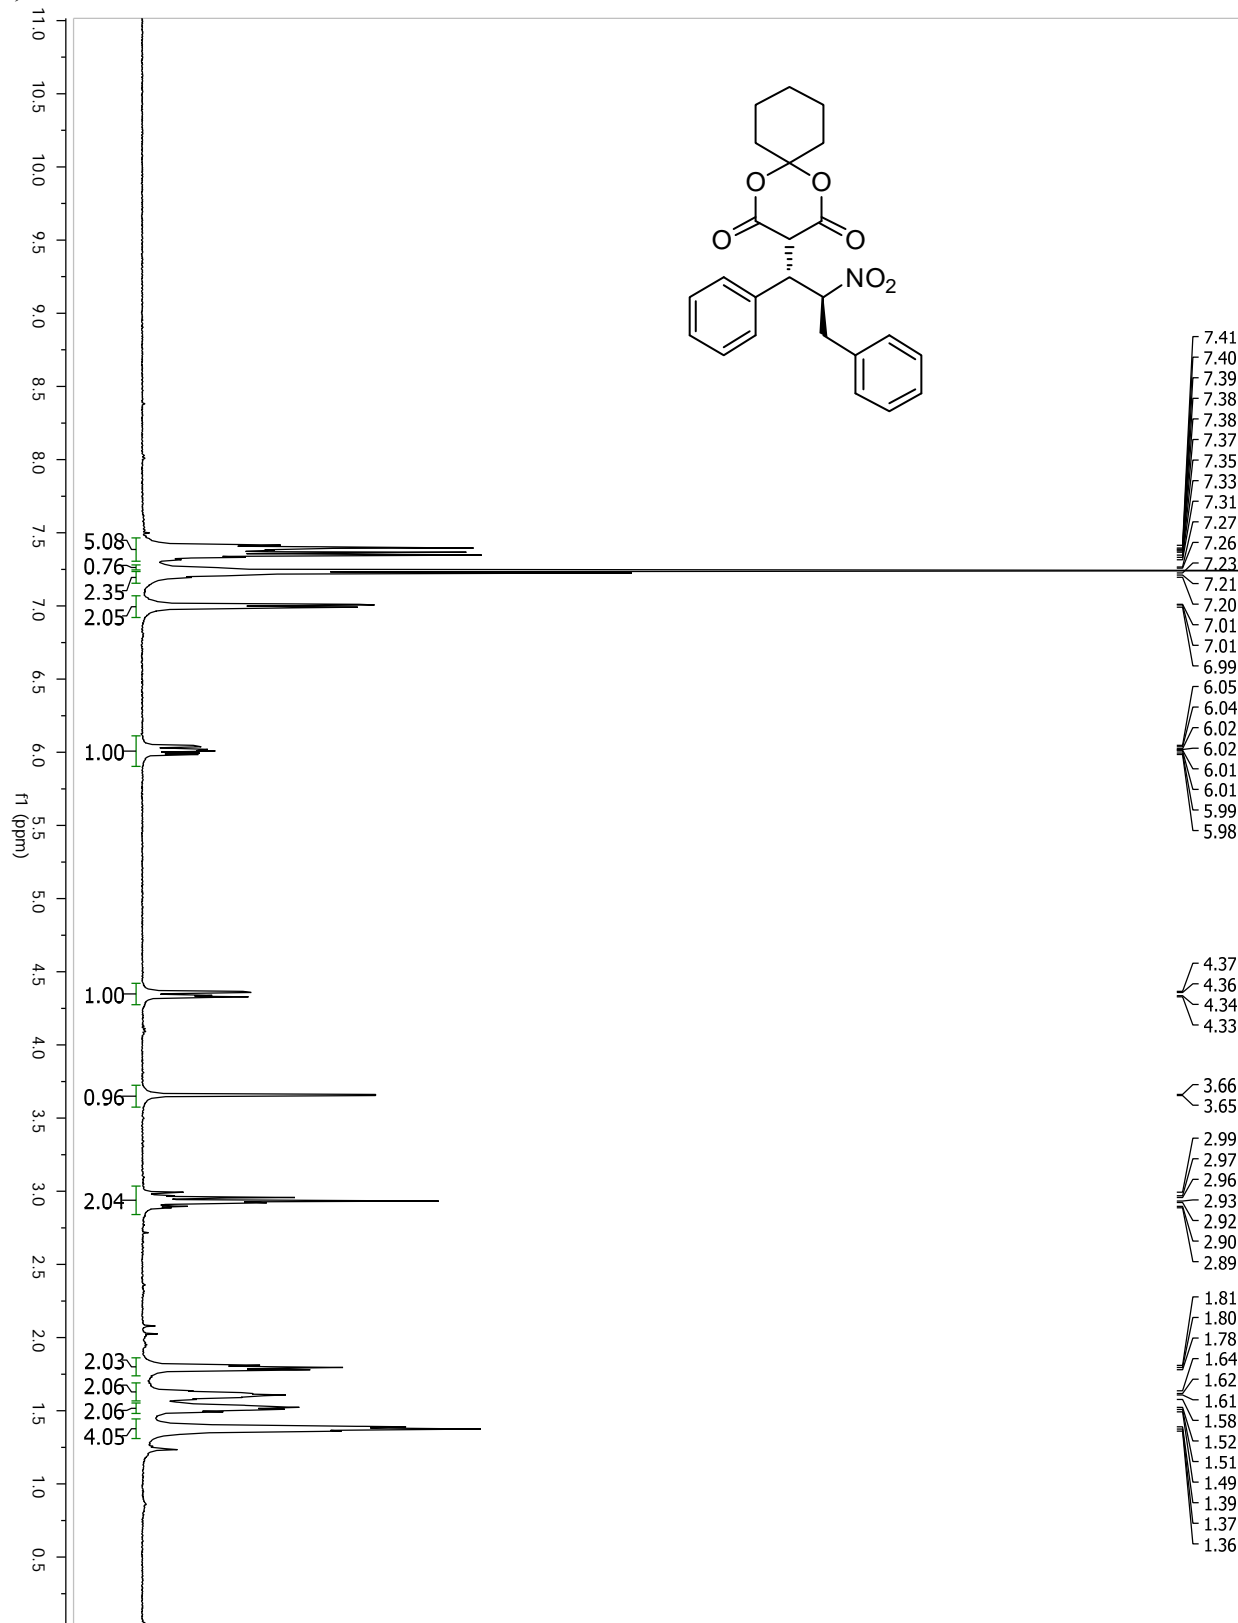

**14f: 3-((1R,2S)-(3-phenyl-2-nitro-1-phenylpropyl)-1,5-dioxaspiro[5.5]undecane-2,4-dione**

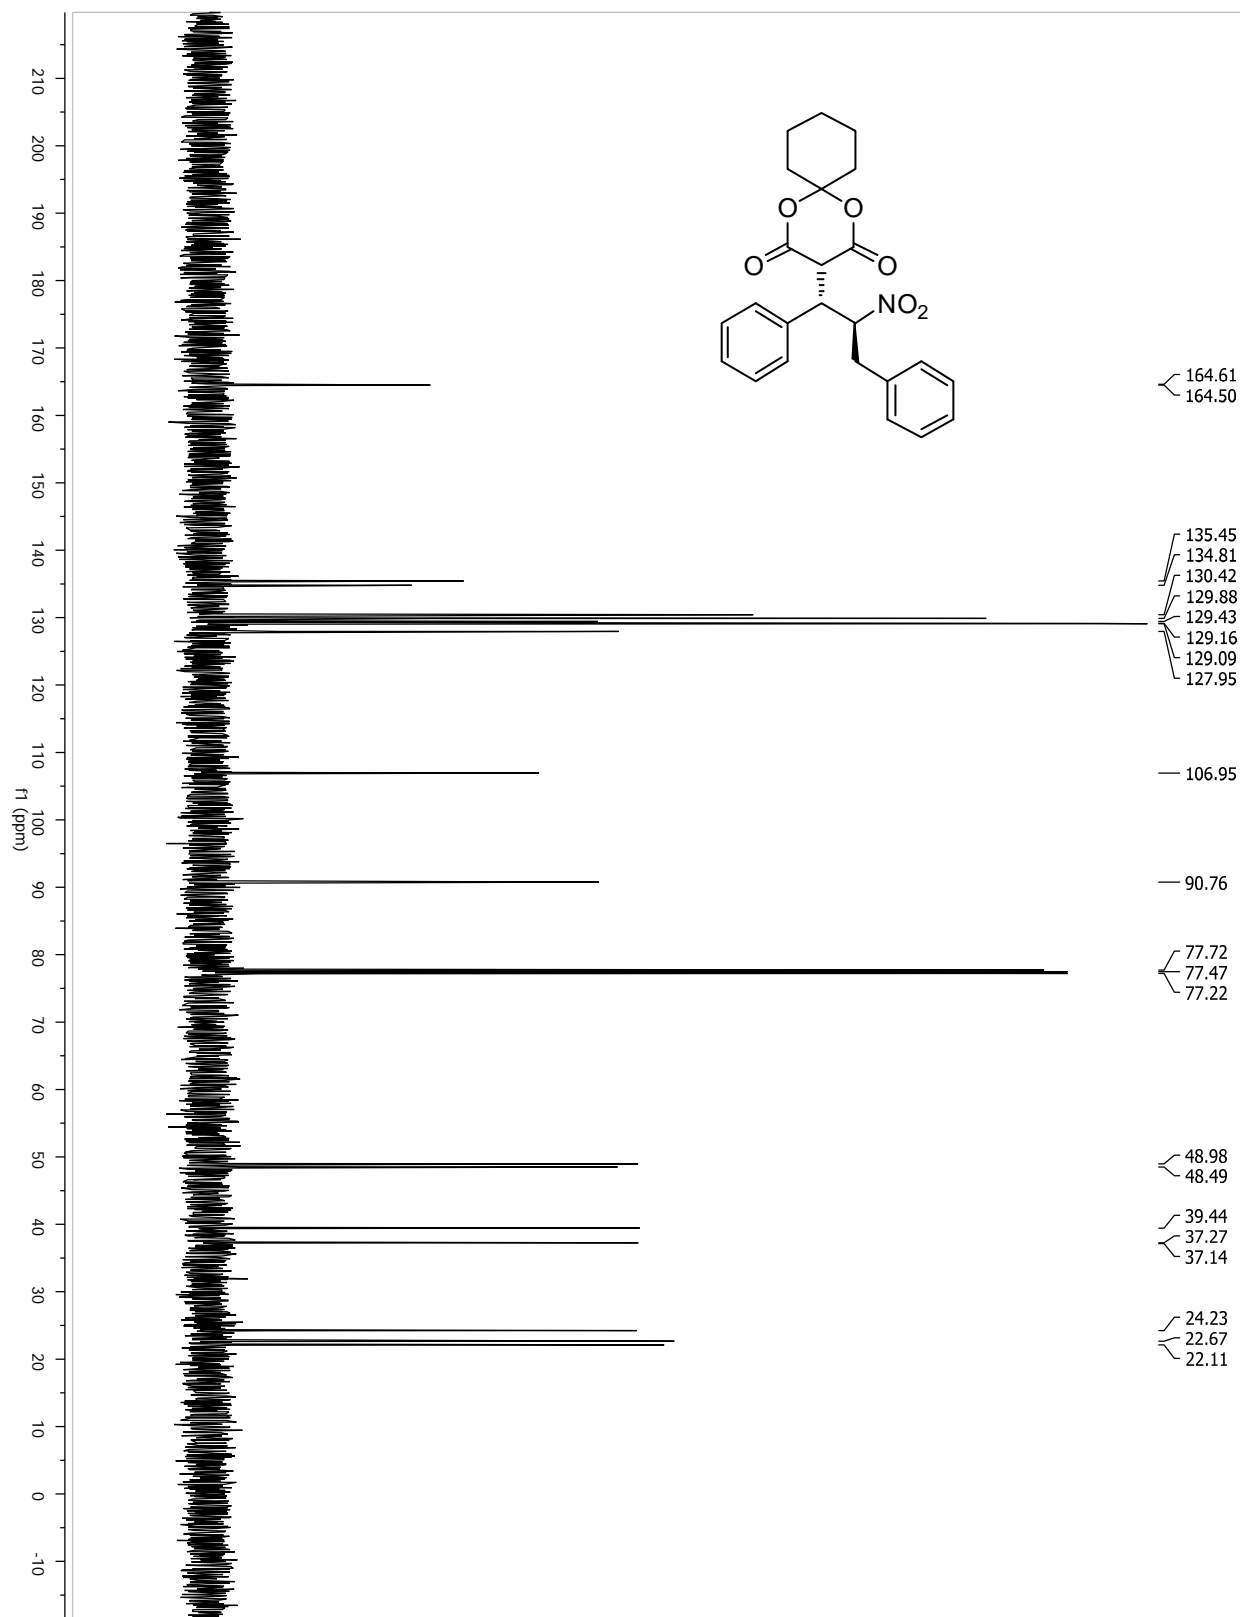



**14g: 3-((1R,2S)- (2-nitro-1-phenylhexyl)-1,5-dioxaspiro[5.5]undecane-2,4-dione**

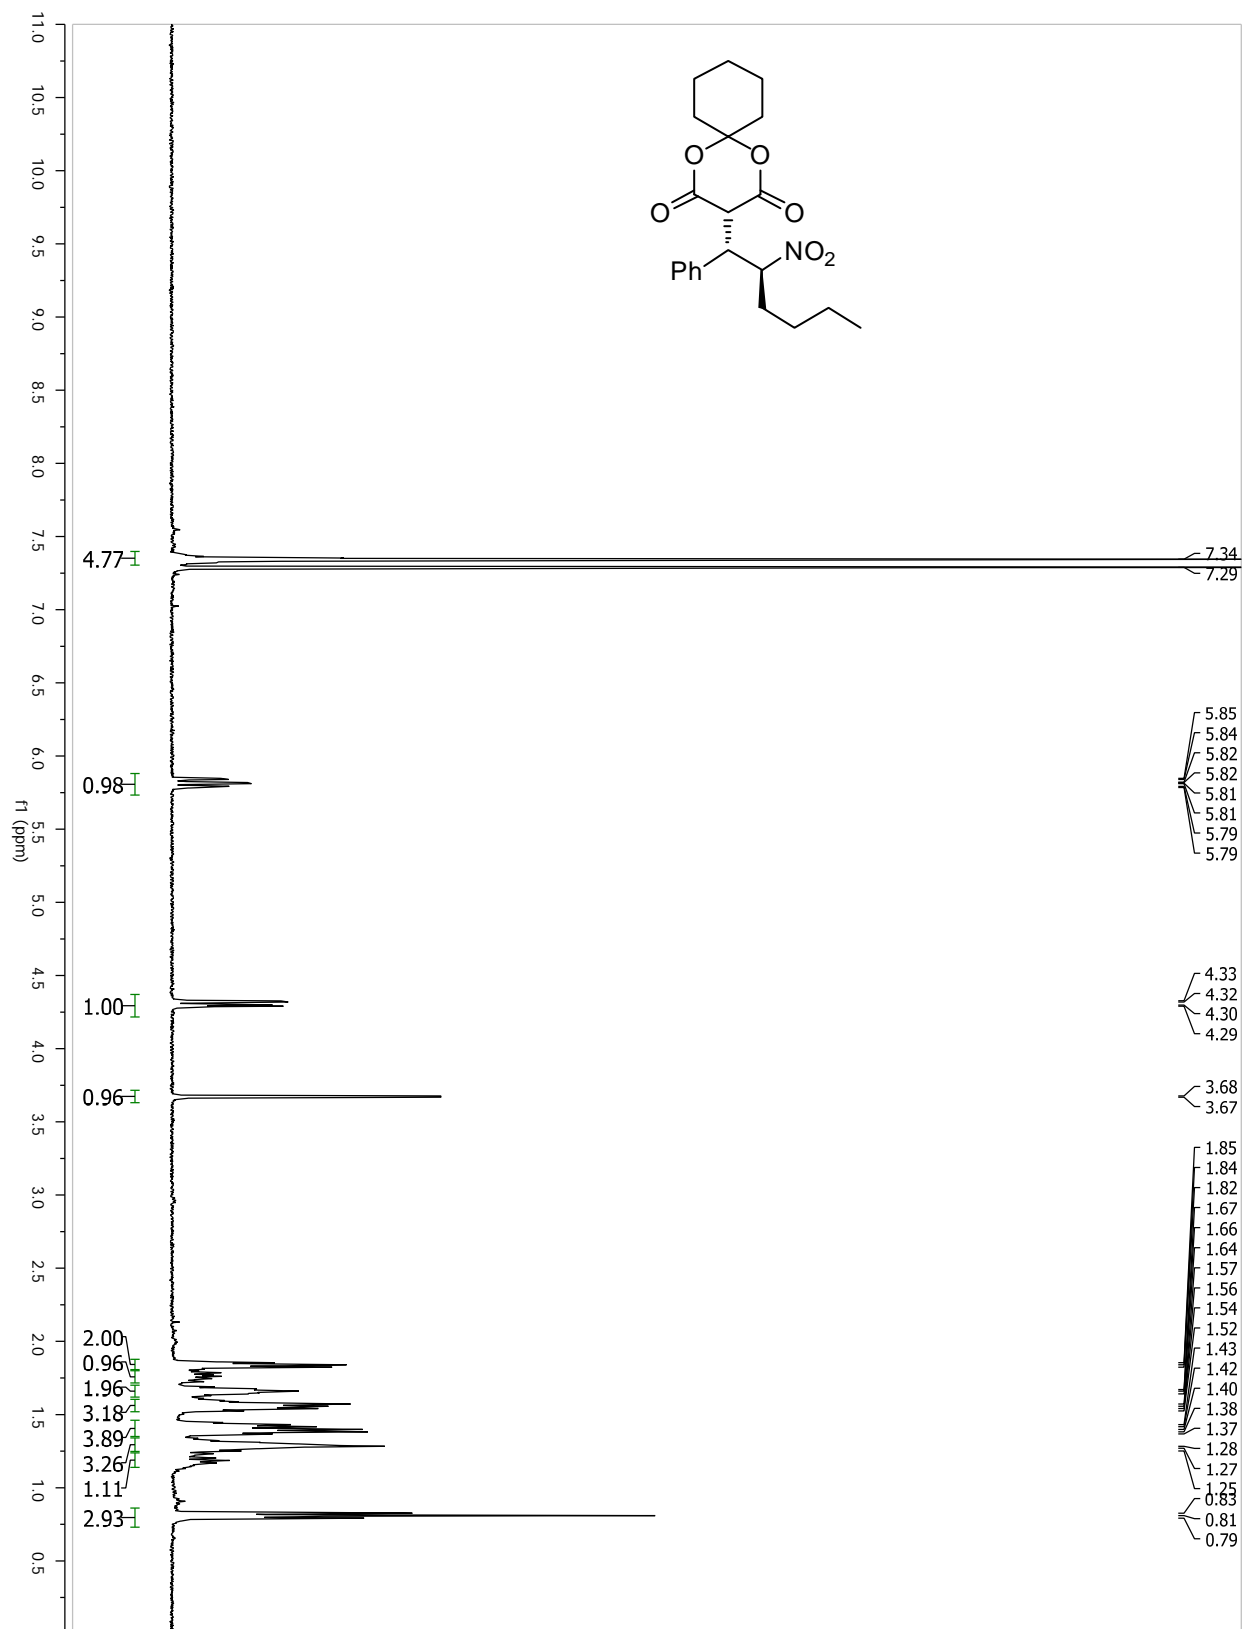

**14g: 3-((1R,2S)- (2-nitro-1-phenylhexyl)-1,5-dioxaspiro[5.5]undecane-2,4-dione**

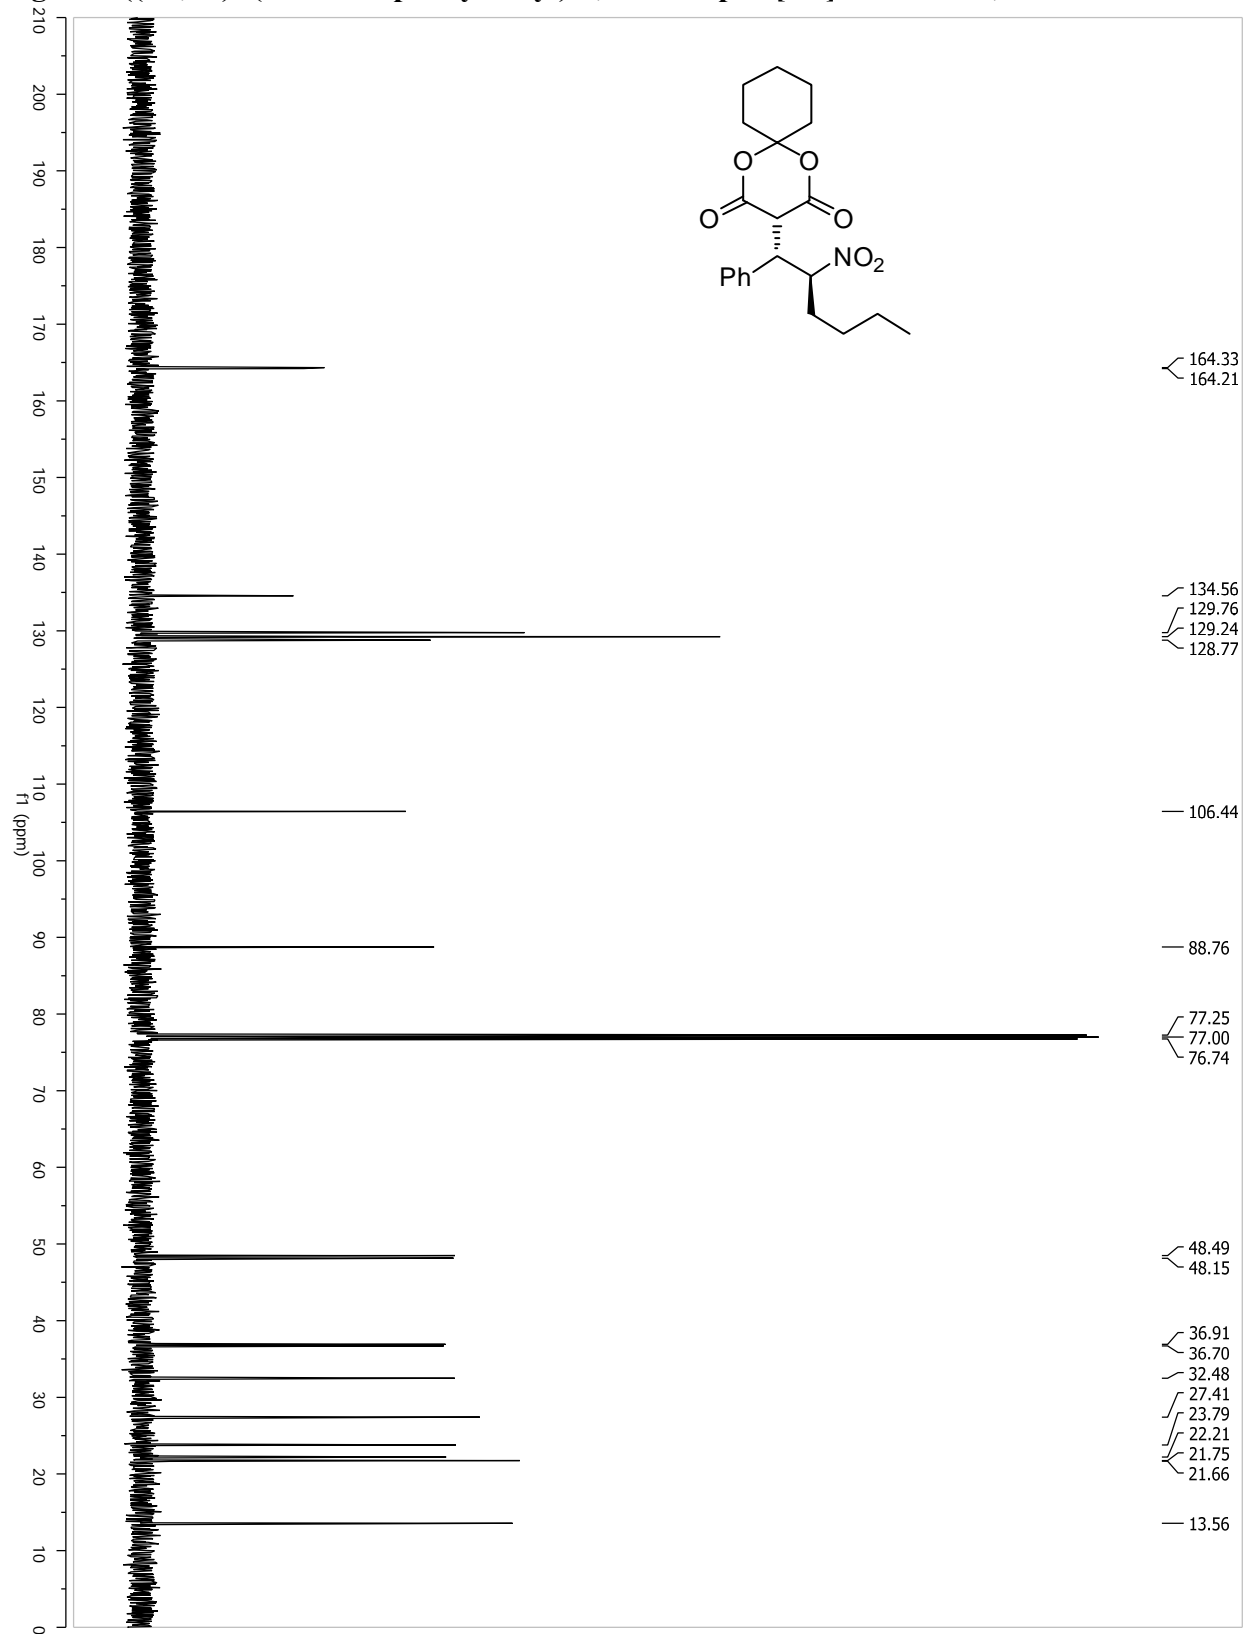

**14h: 3-((1*R*,2*S*)-2-nitrocyclohexyl)-1,5-dioxaspiro[5.5]undecane-2,4-dione**

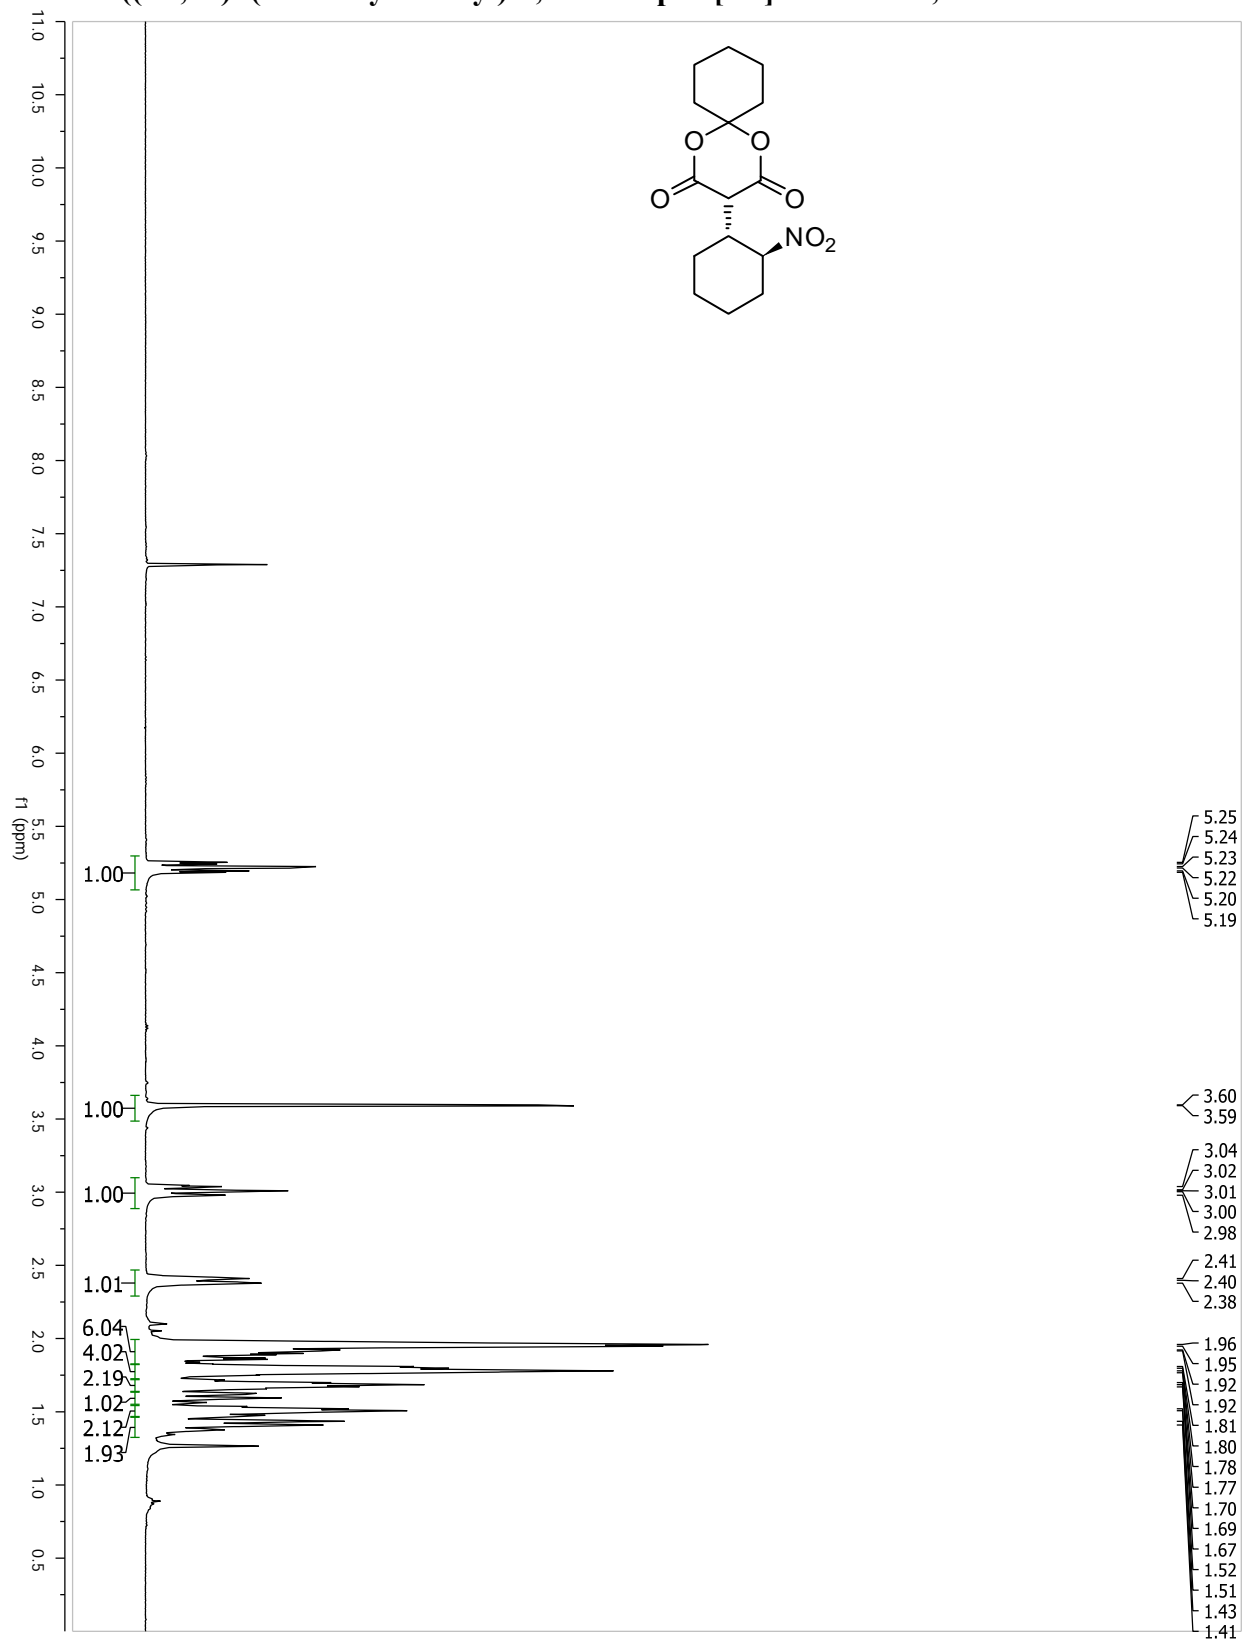

**14h: 3-((1R,2S)- (2-nitrocyclohexyl)-1,5-dioxaspiro[5.5]undecane-2,4-dione**

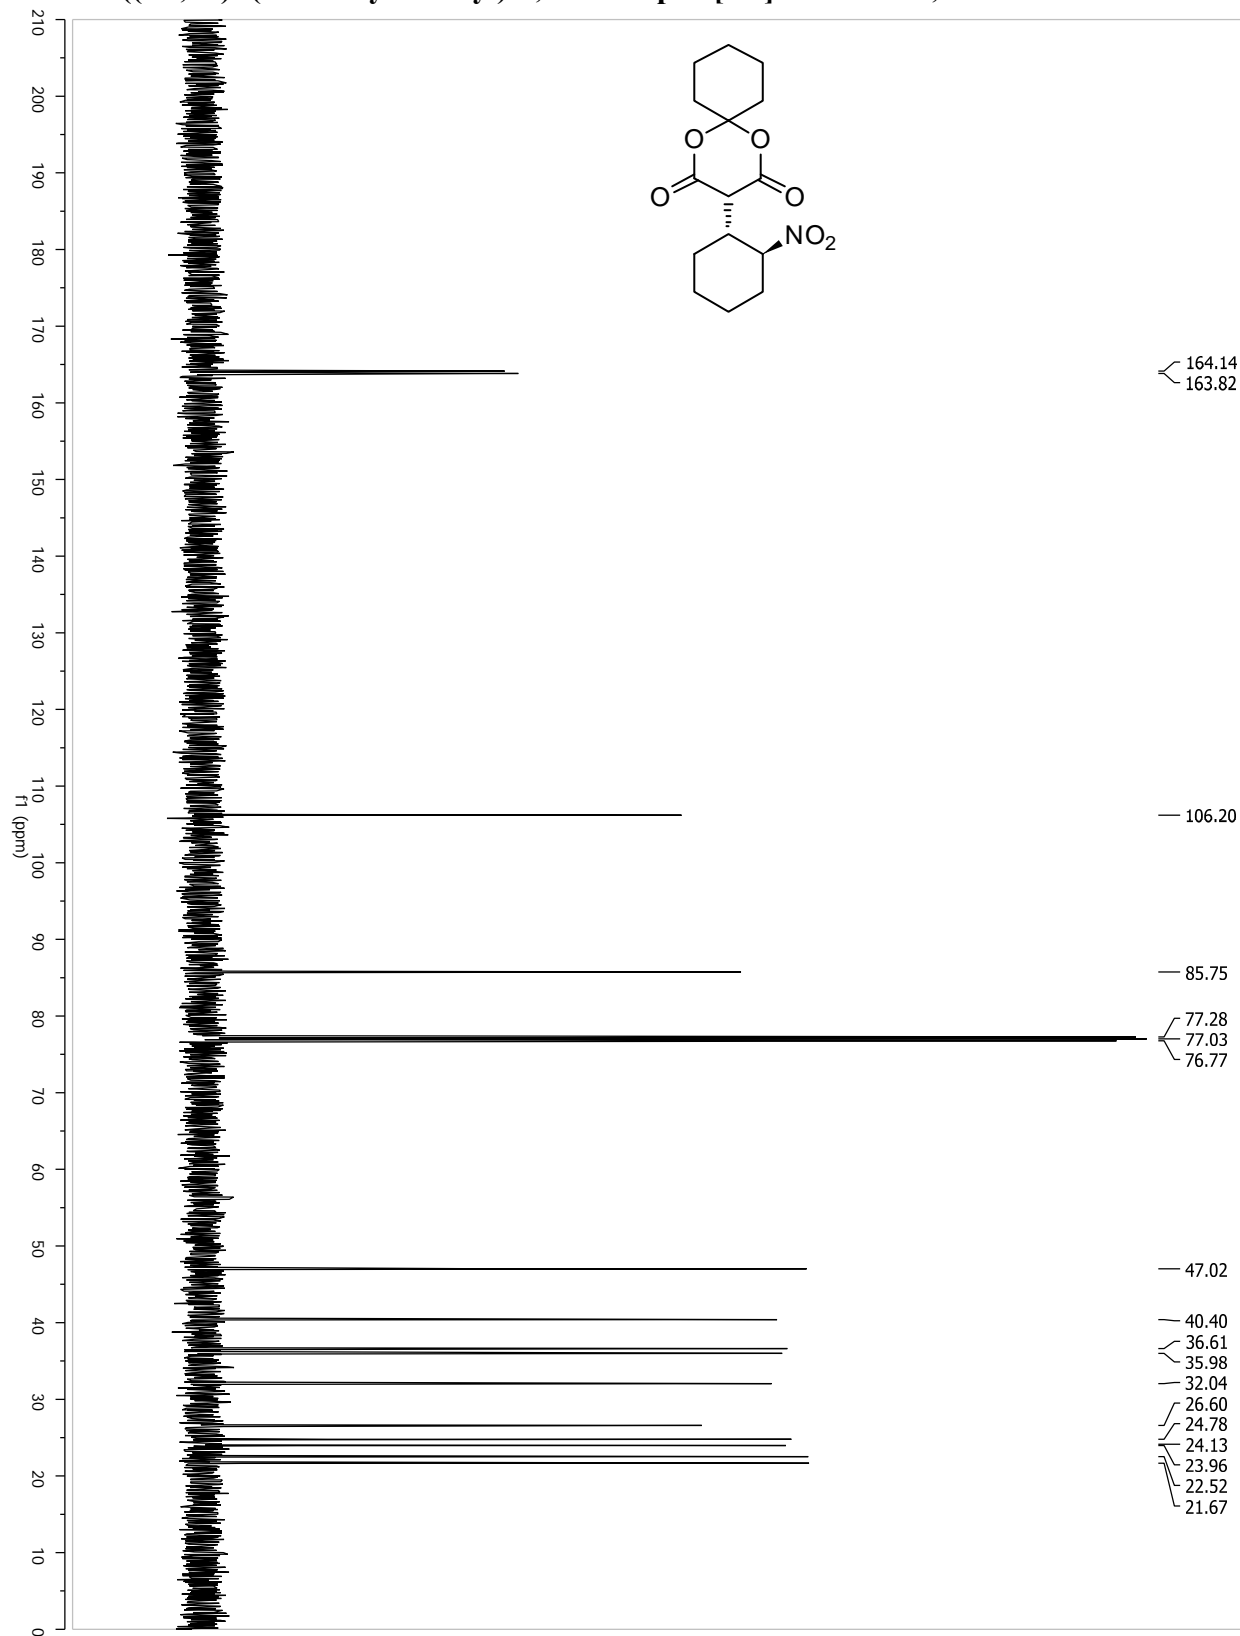

**14i: 3-((1R,2S)- (2-nitrocyclopentyl)-1,5-dioxaspiro[5.5]undecane-2,4-dione**

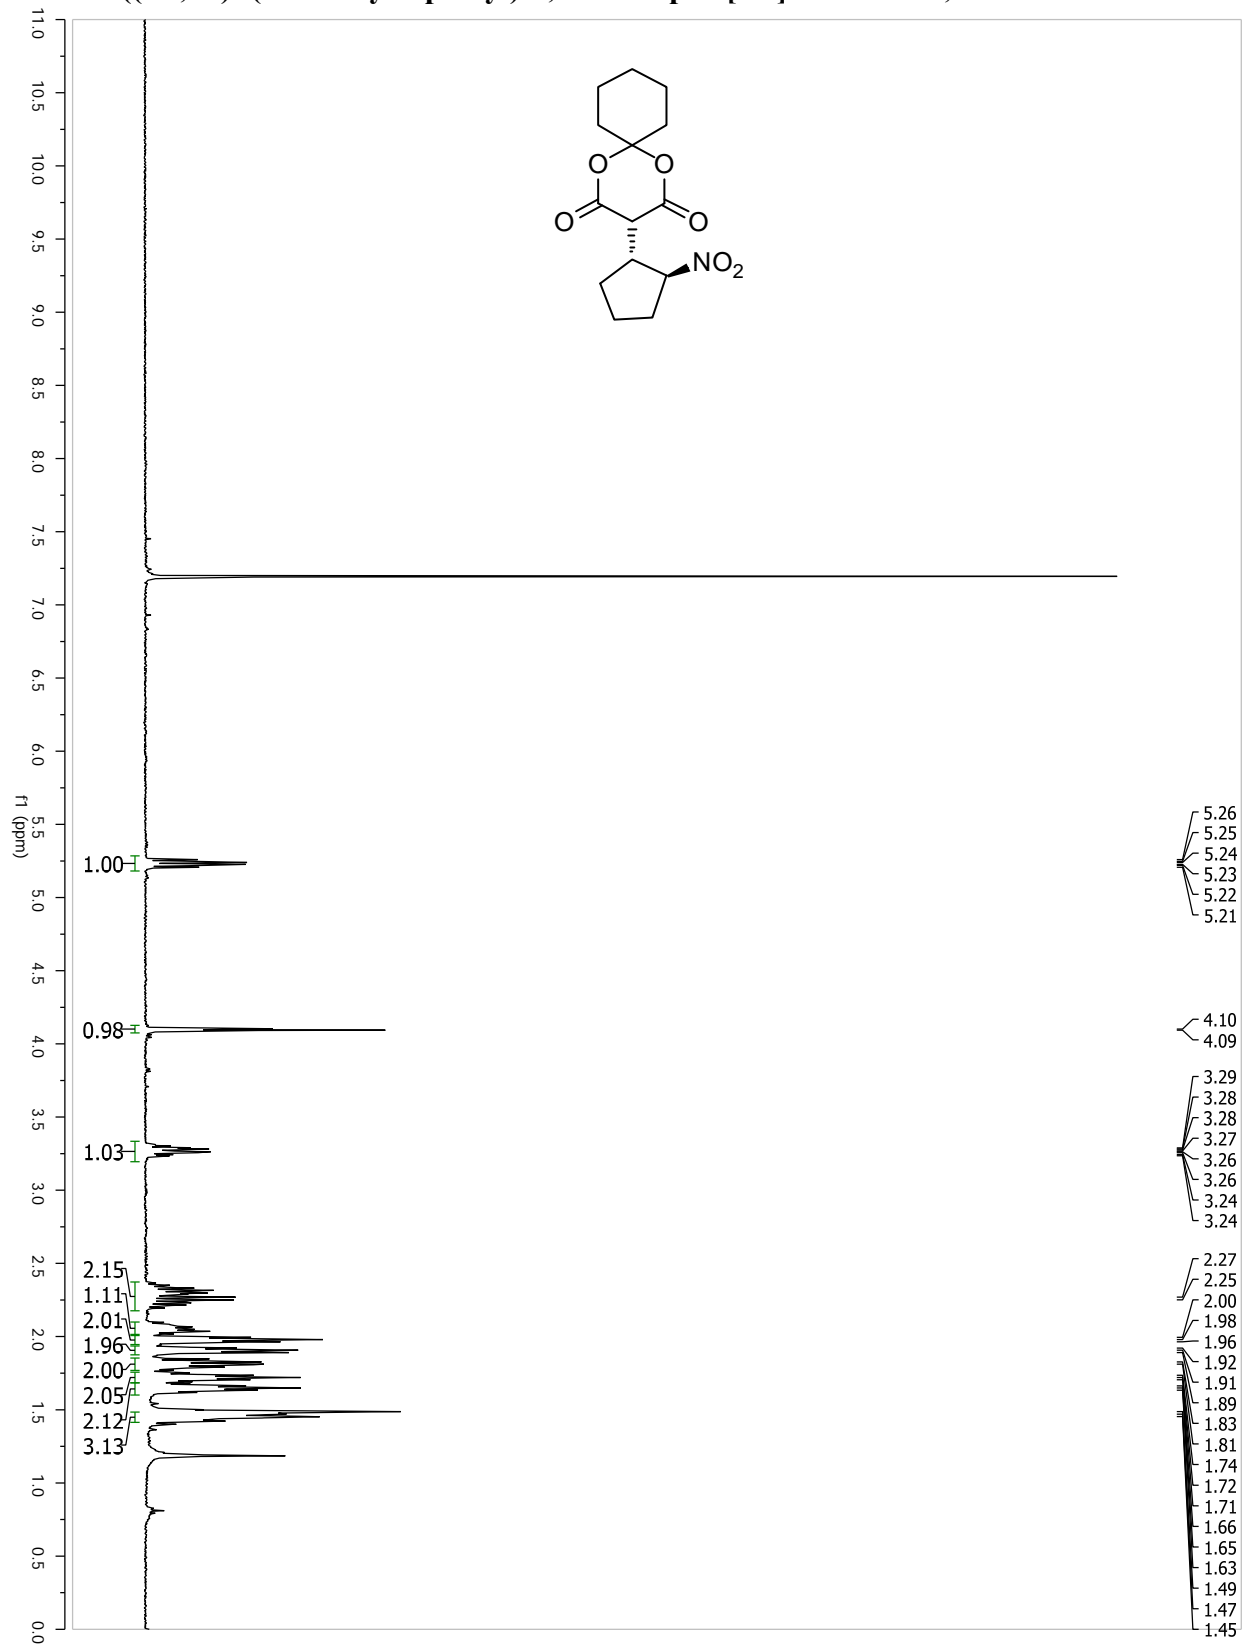

14i: 3-((1*R*,2*S*)- (2-nitrocyclopentyl)-1,5-dioxaspiro[5.5]undecane-2,4-dione

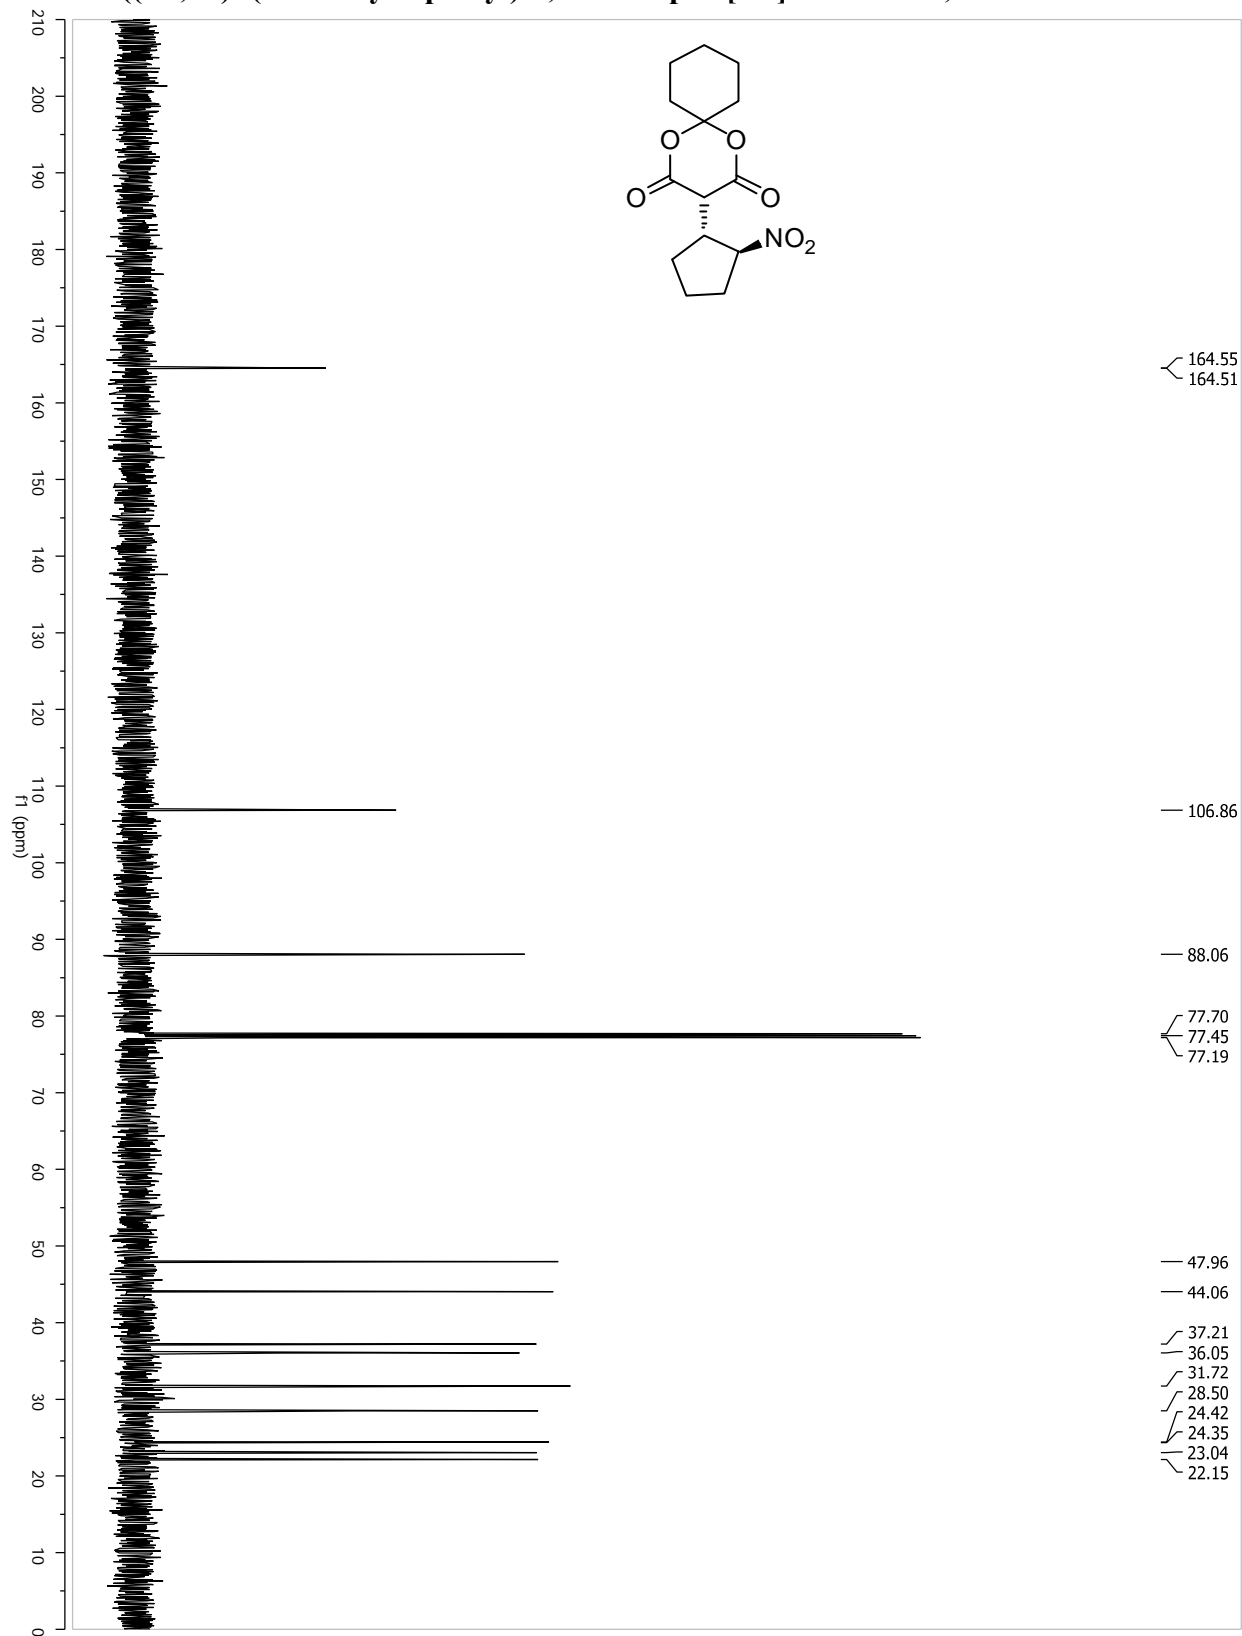

14j: 3-((1*R*,2*S*)-2-nitrocycloheptyl)-1,5-dioxaspiro[5.5]undecane-2,4-dione

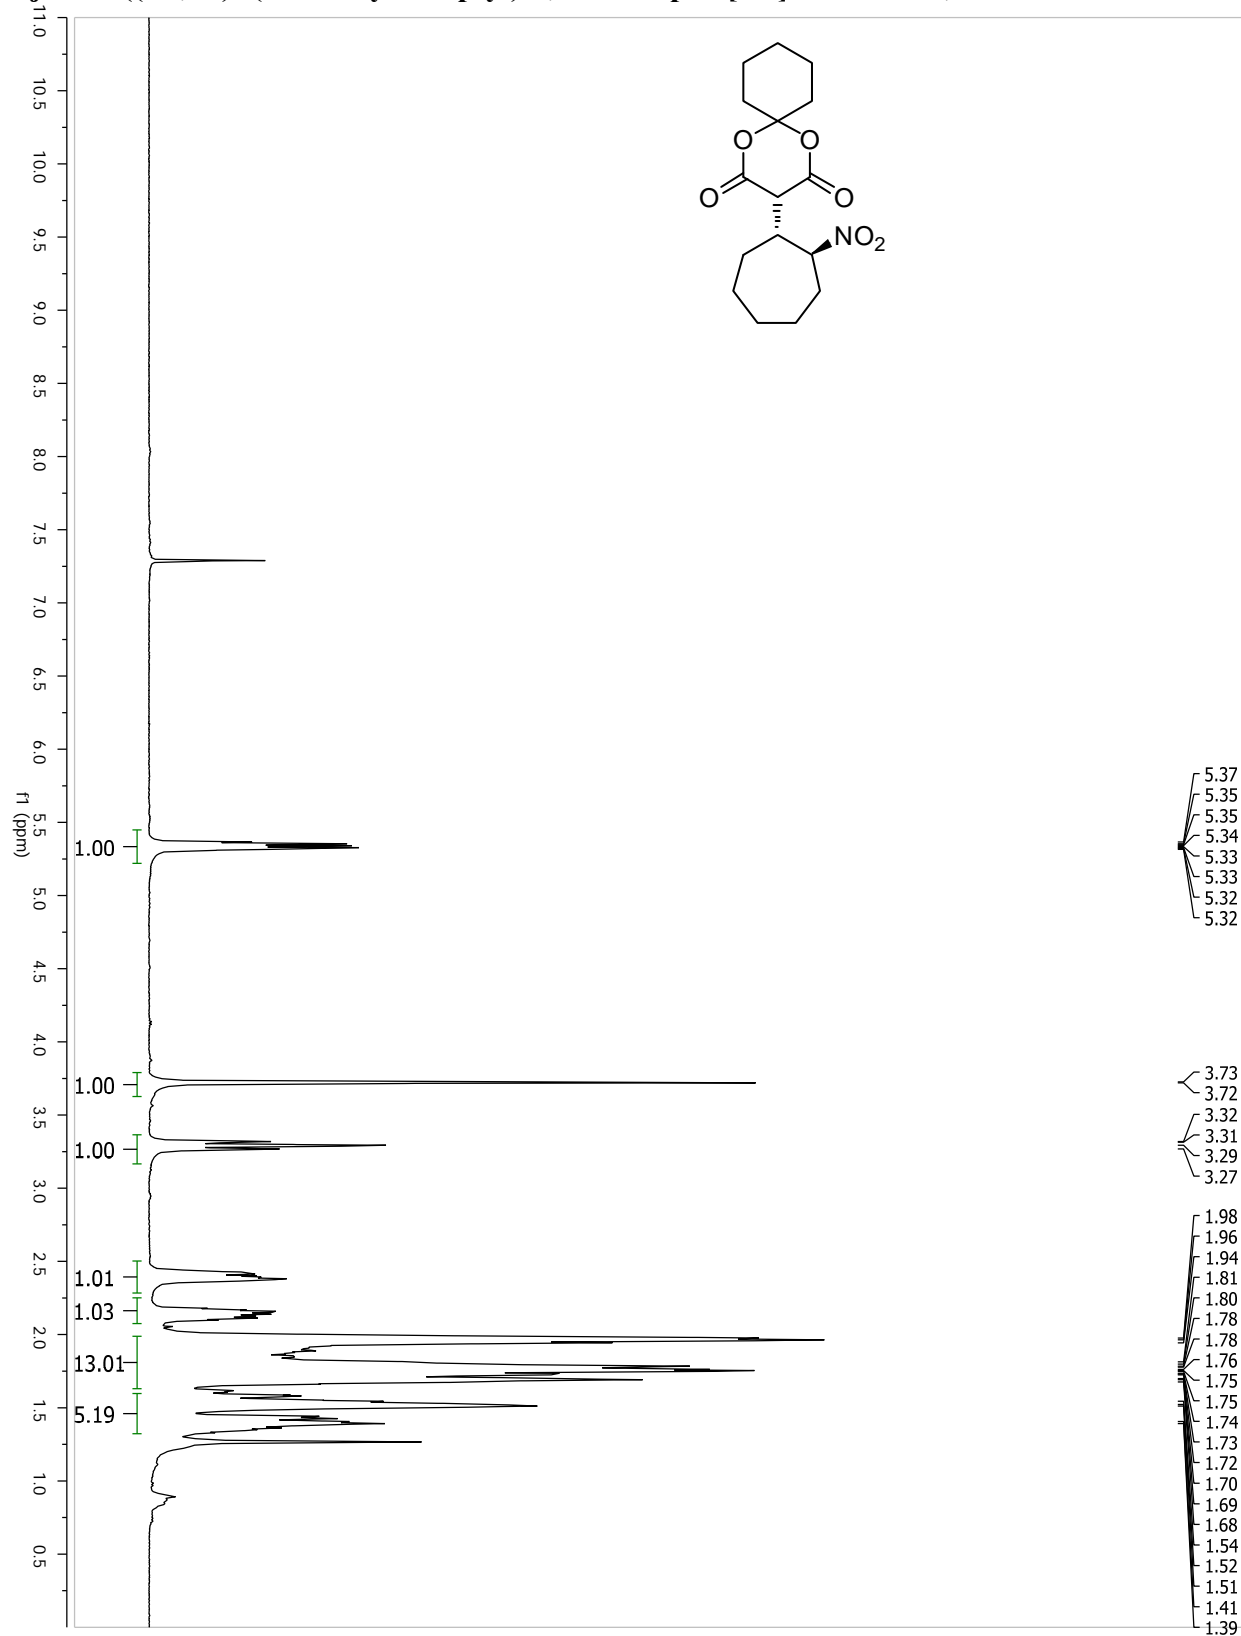

14j: 3-((1R,2S)- (2-nitrocycloheptyl)-1,5-dioxaspiro[5.5]undecane-2,4-dione

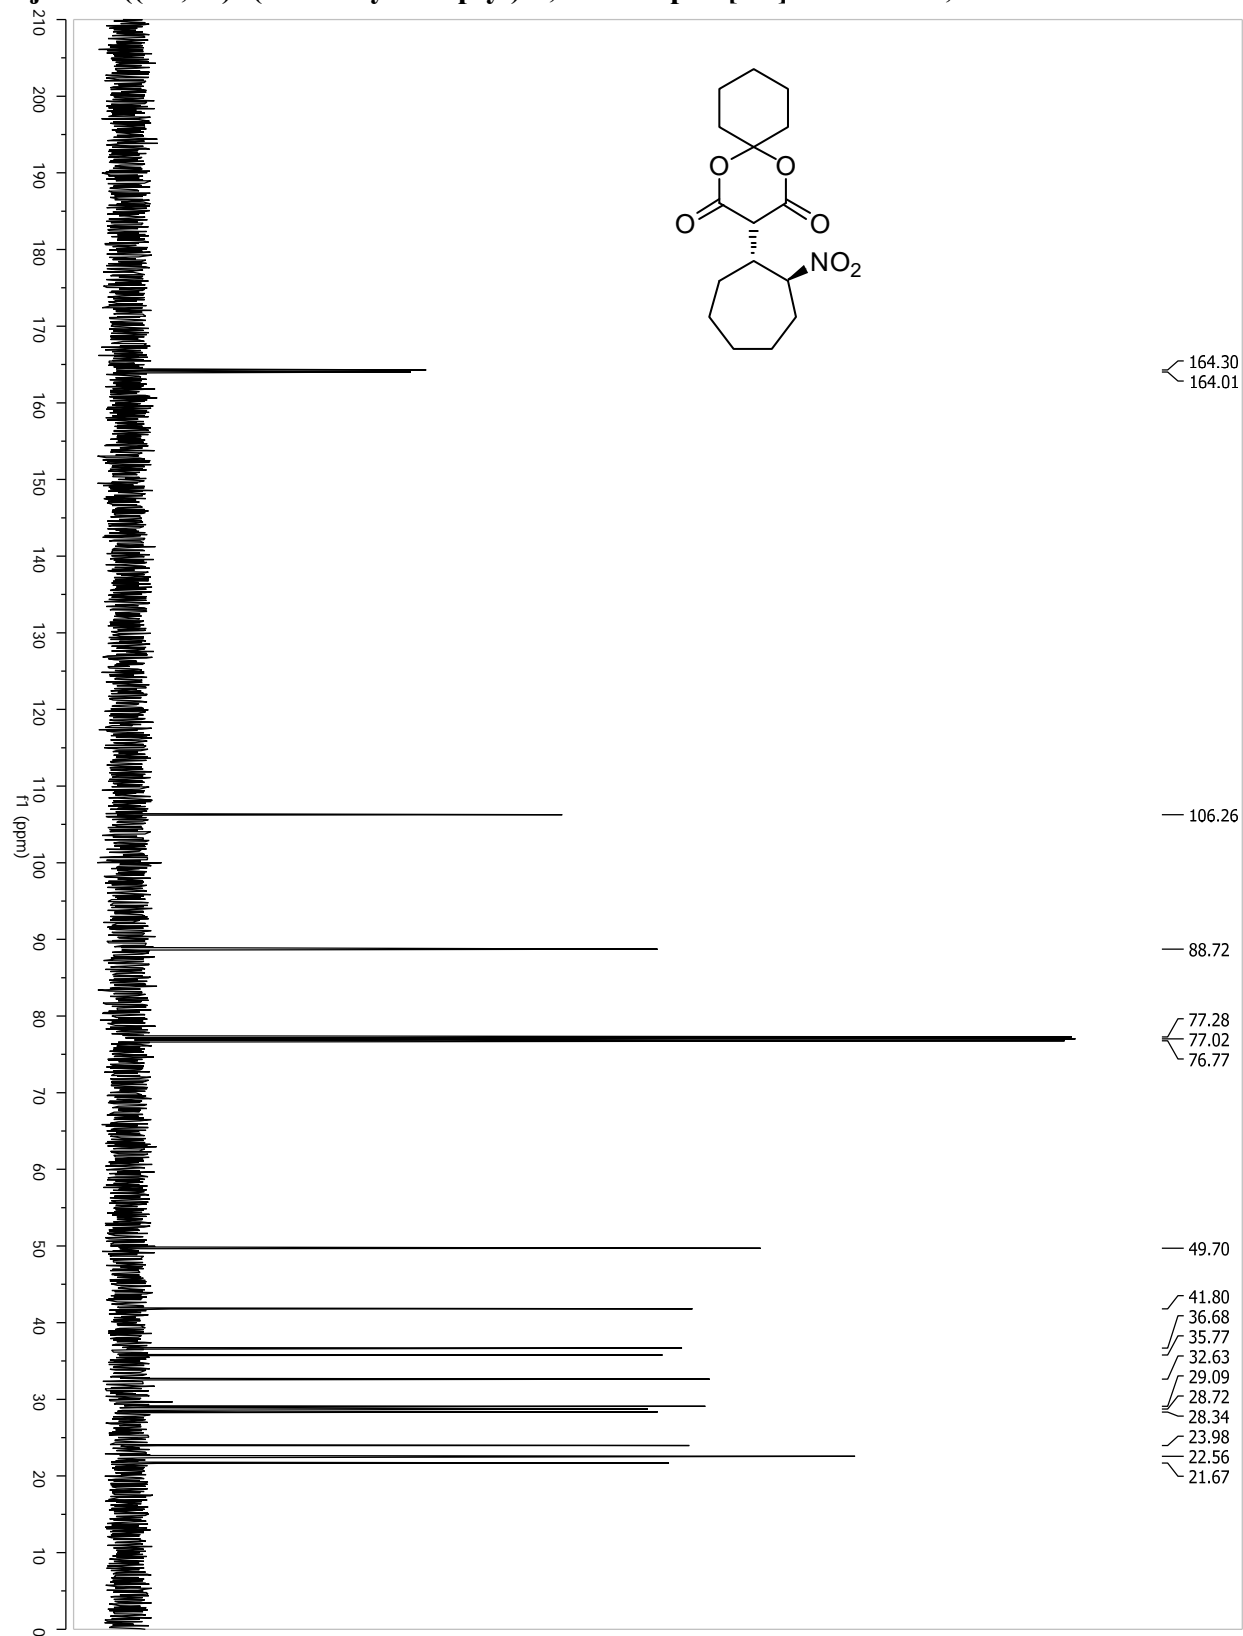



### Lyrica Precursor 15:

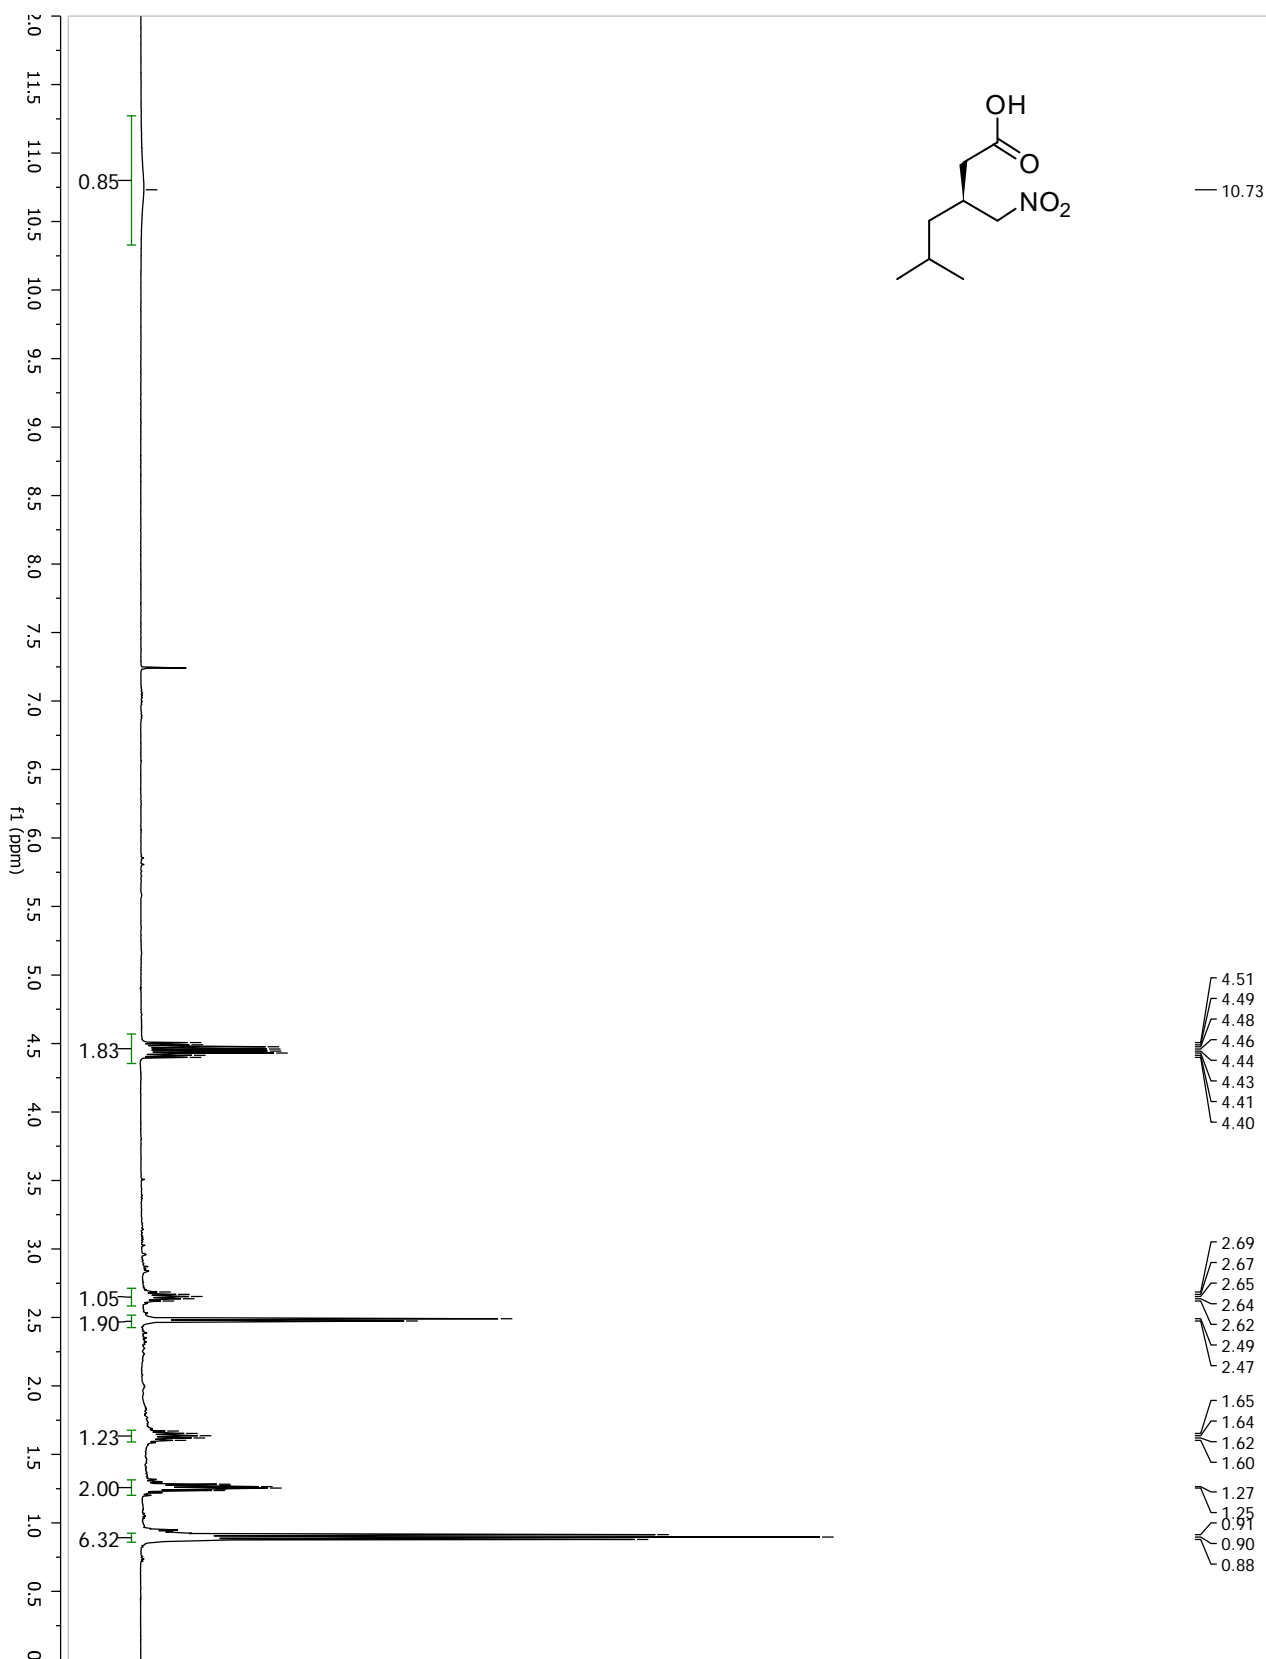

### Lyrica Precursor 15:

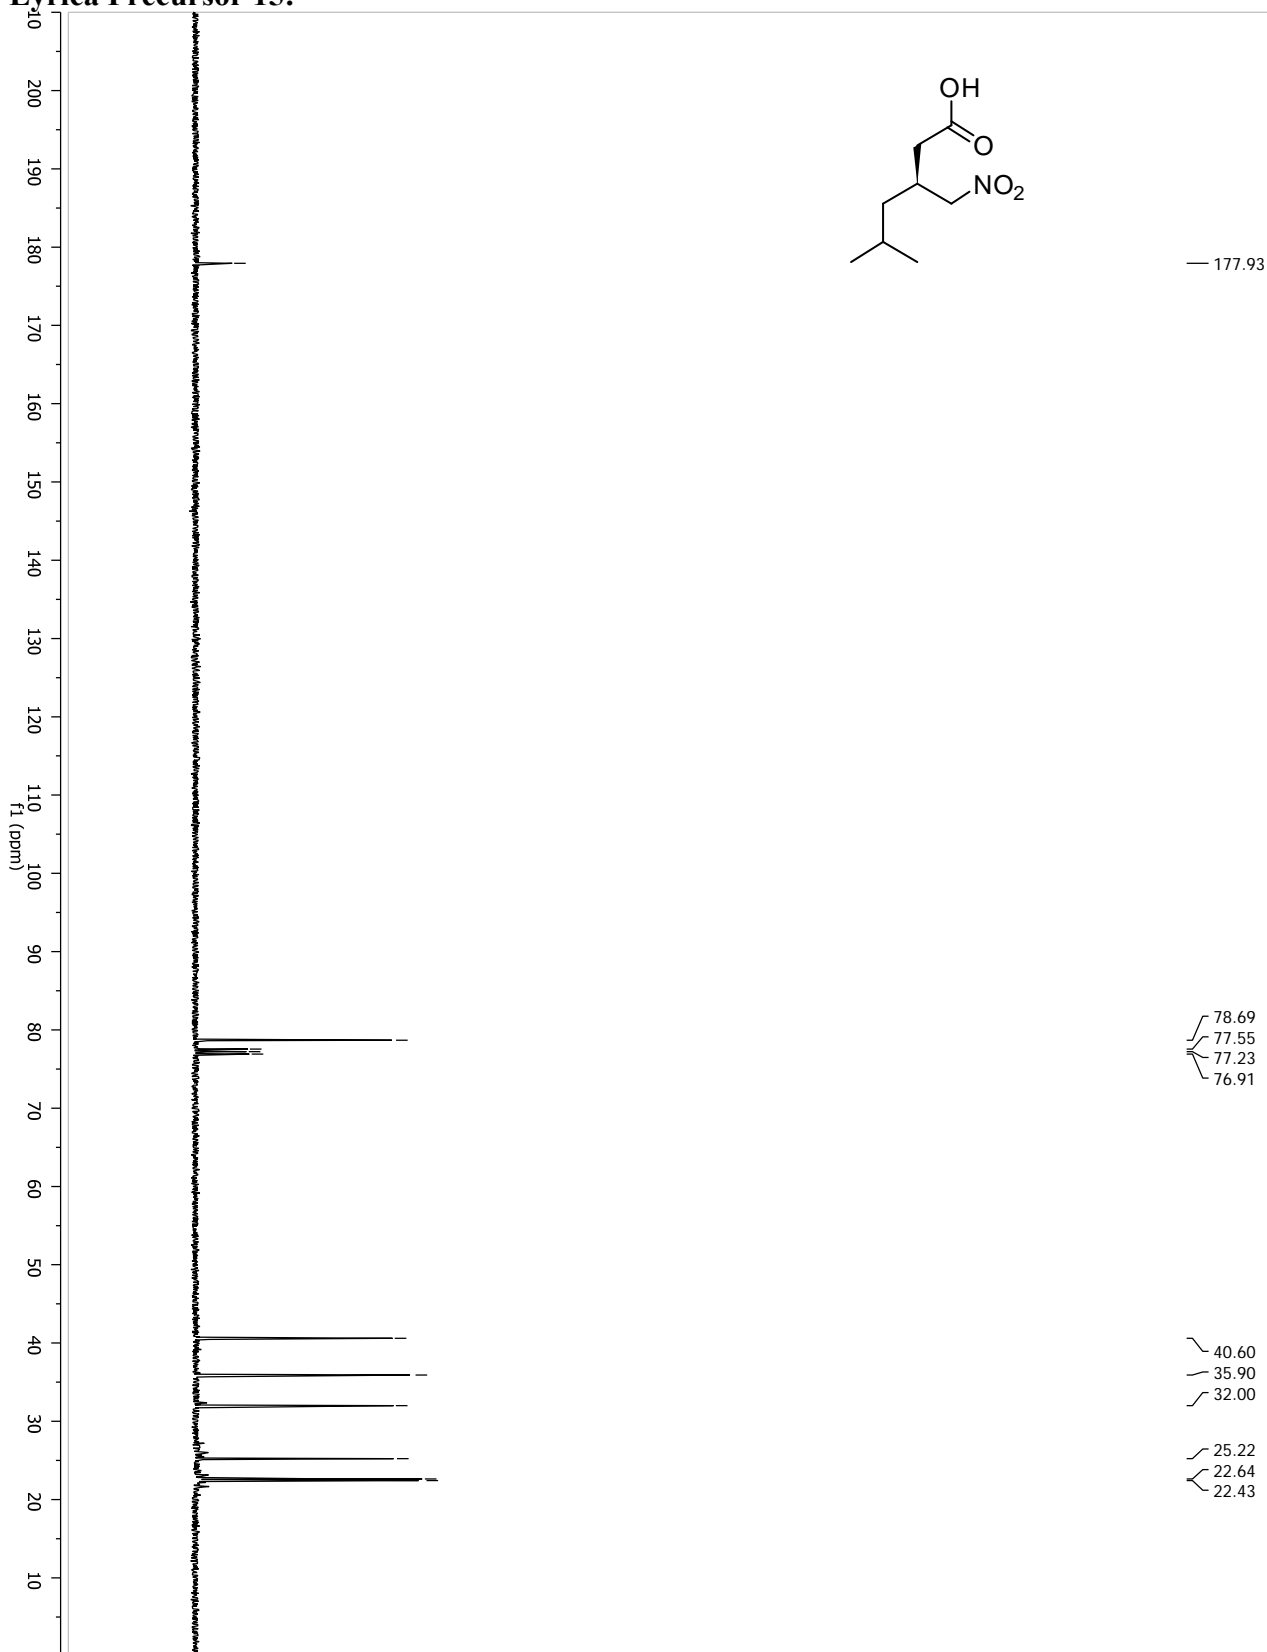

### Intermediate 16:

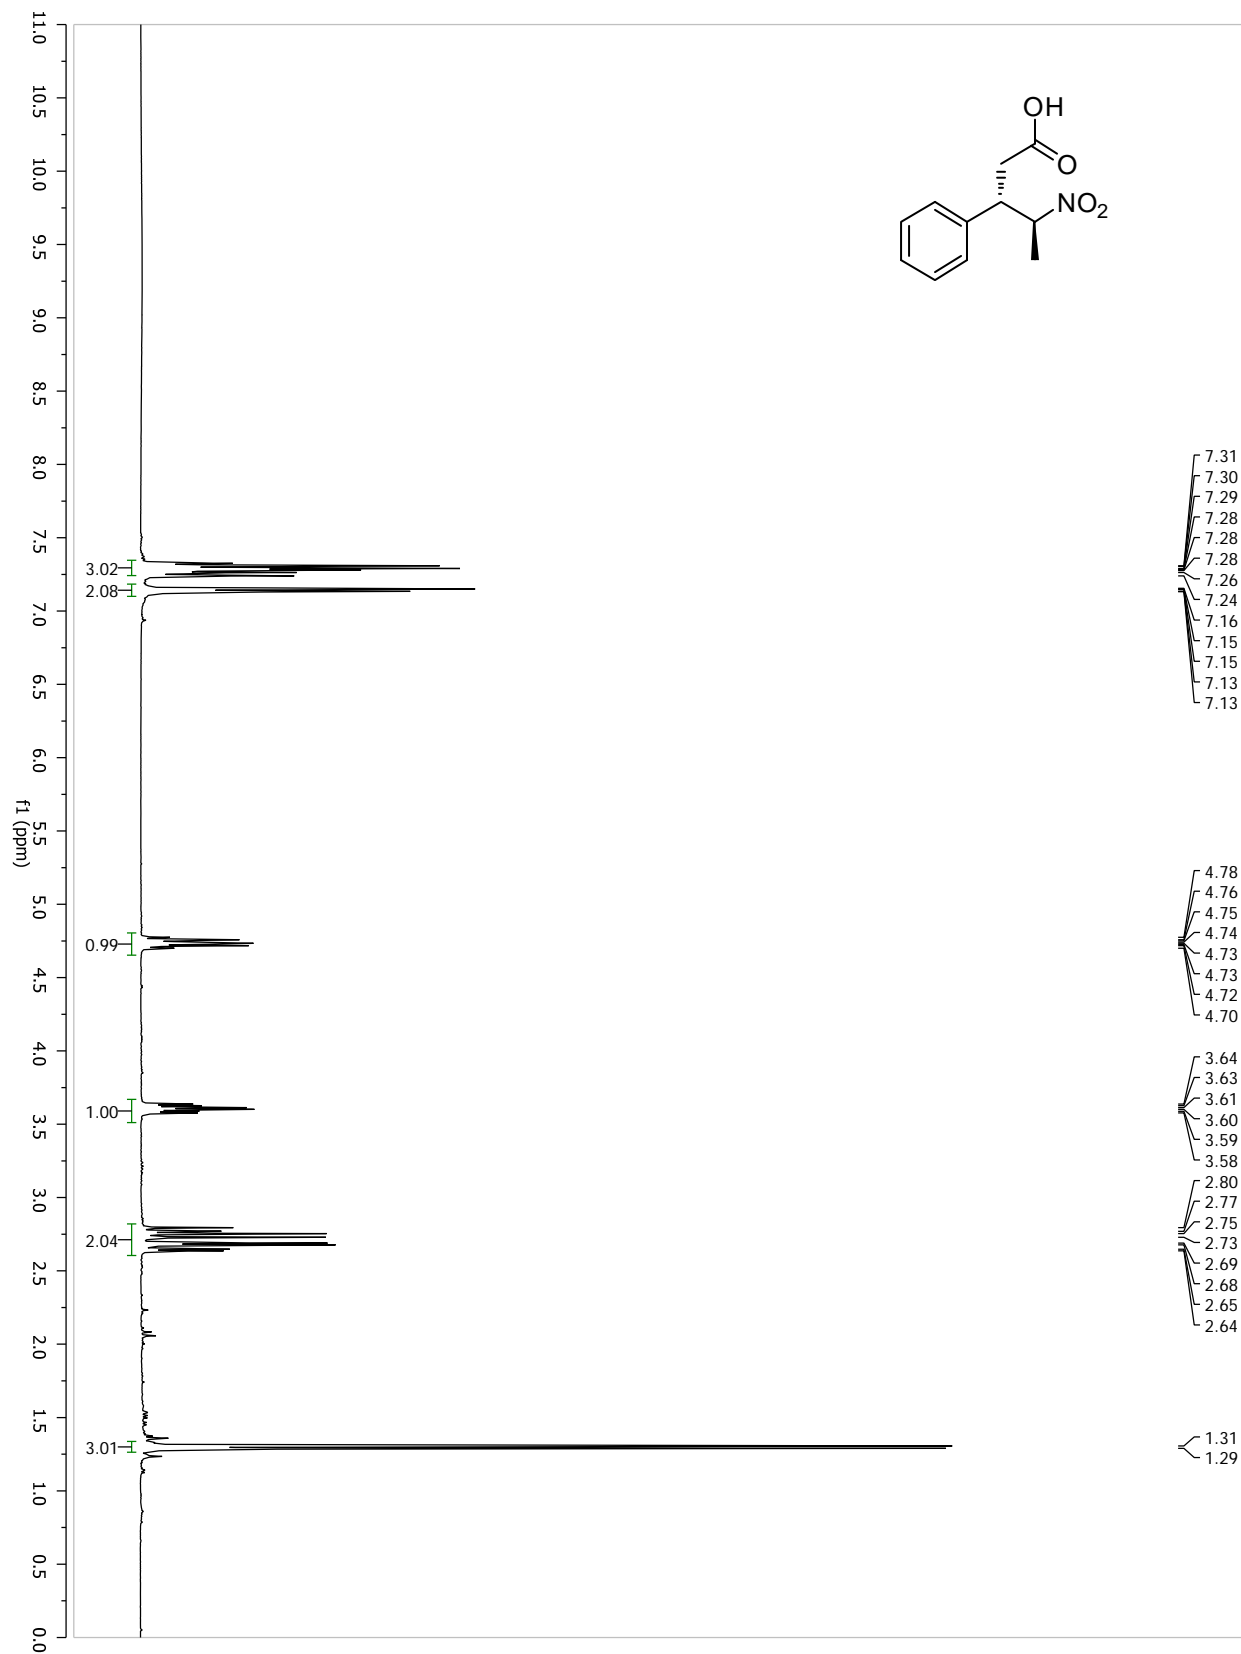

### Intermediate 16:

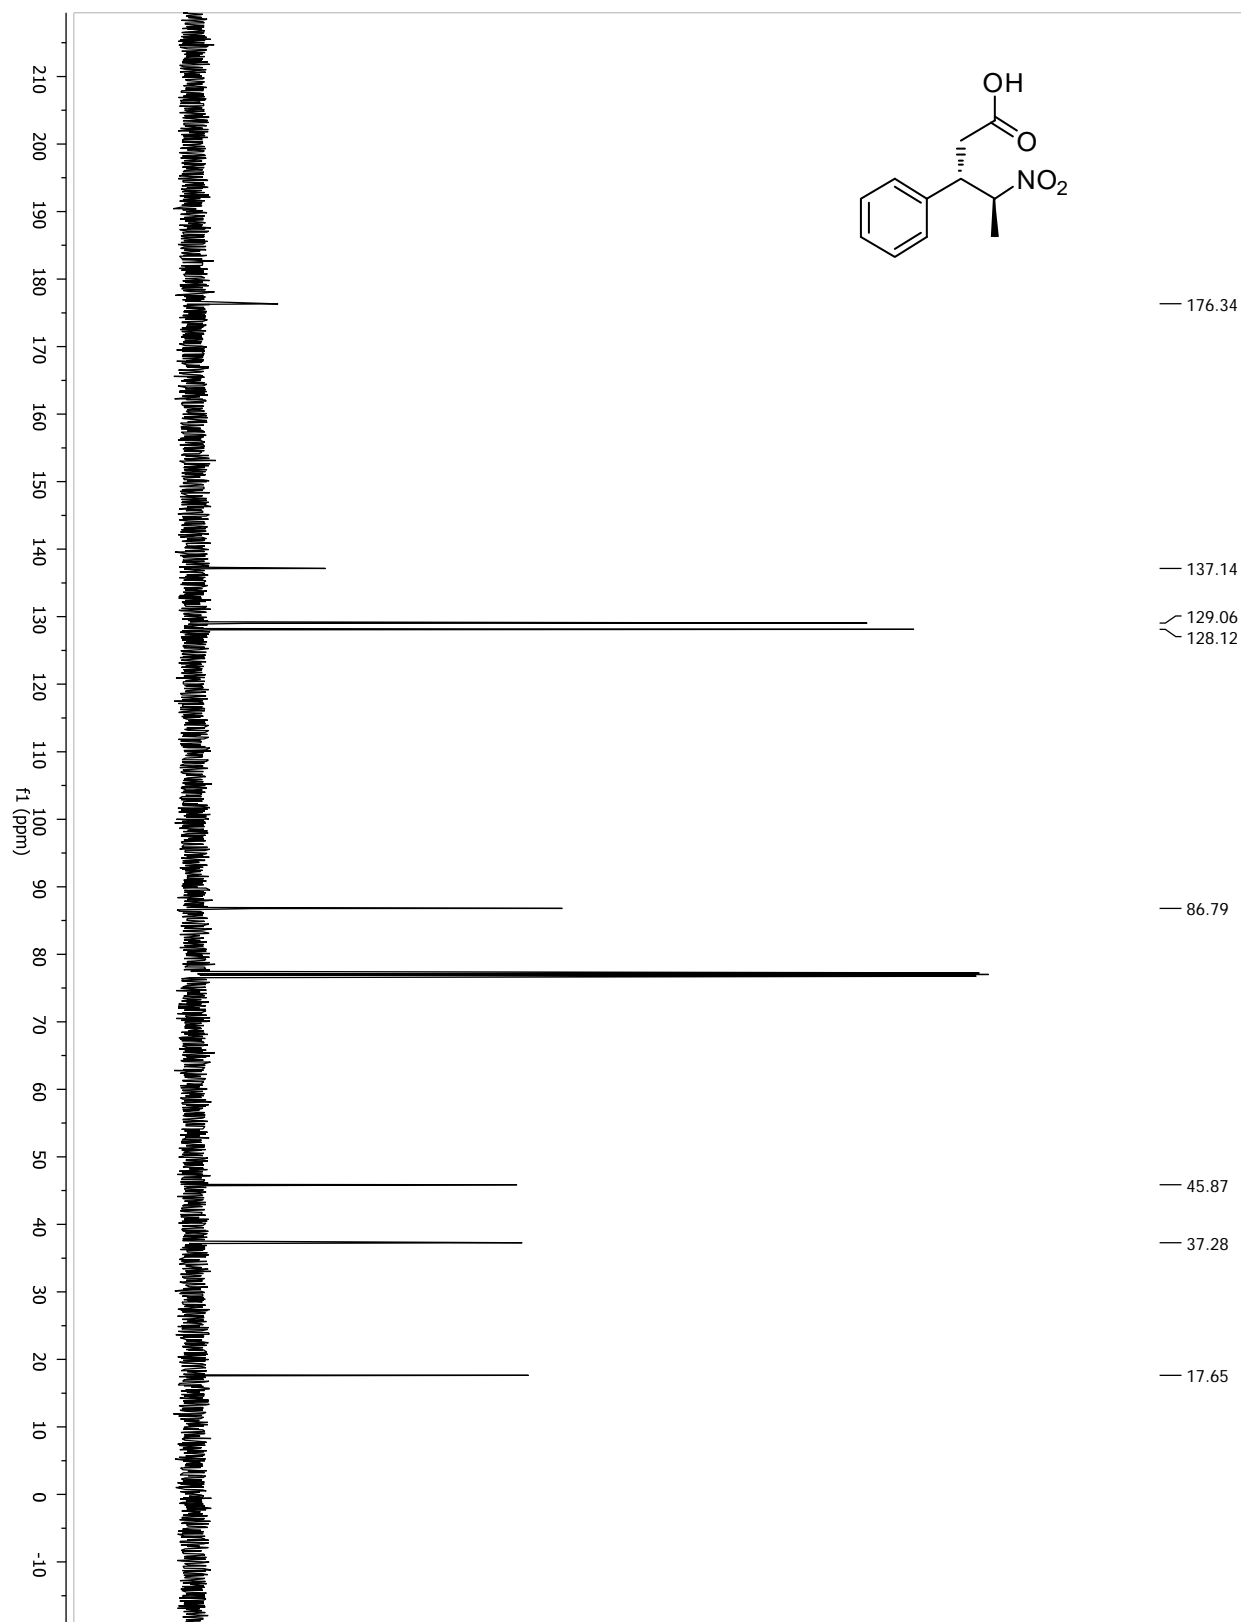

**Product 17:**

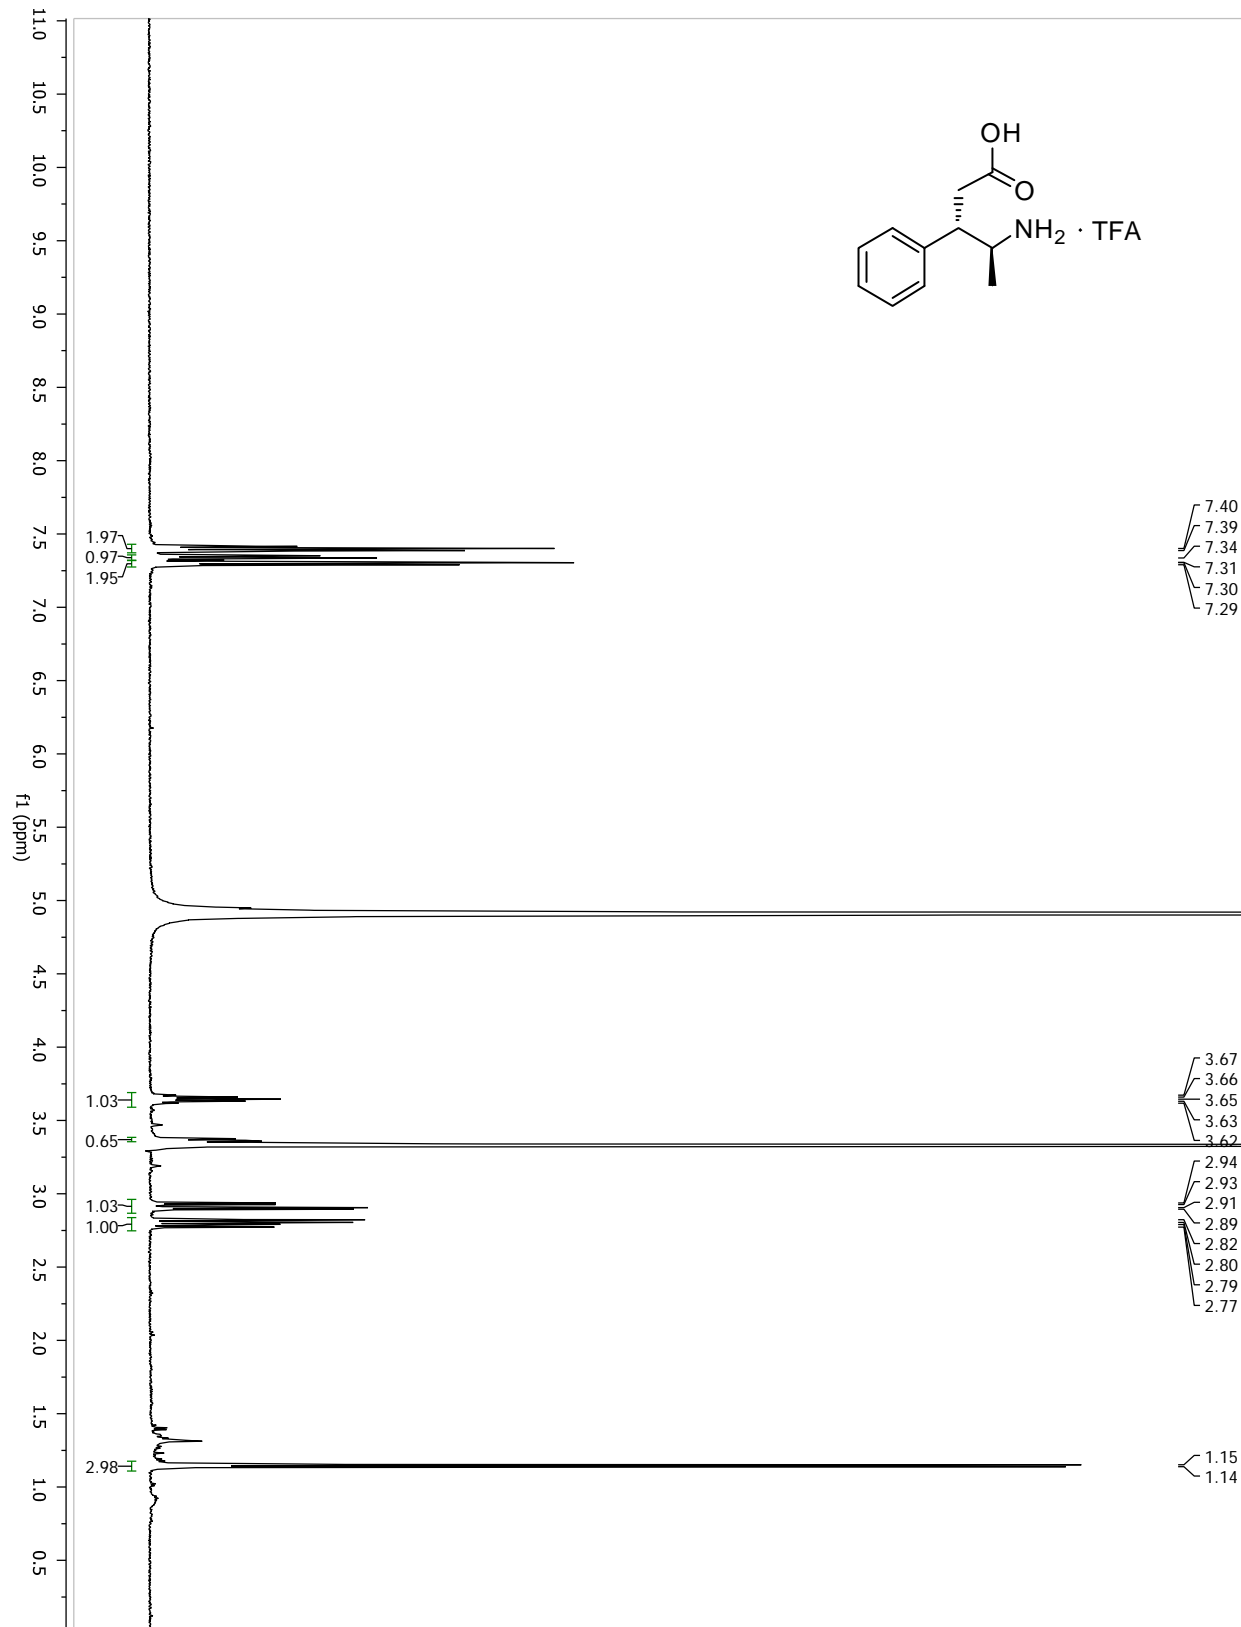

**Product 17:**

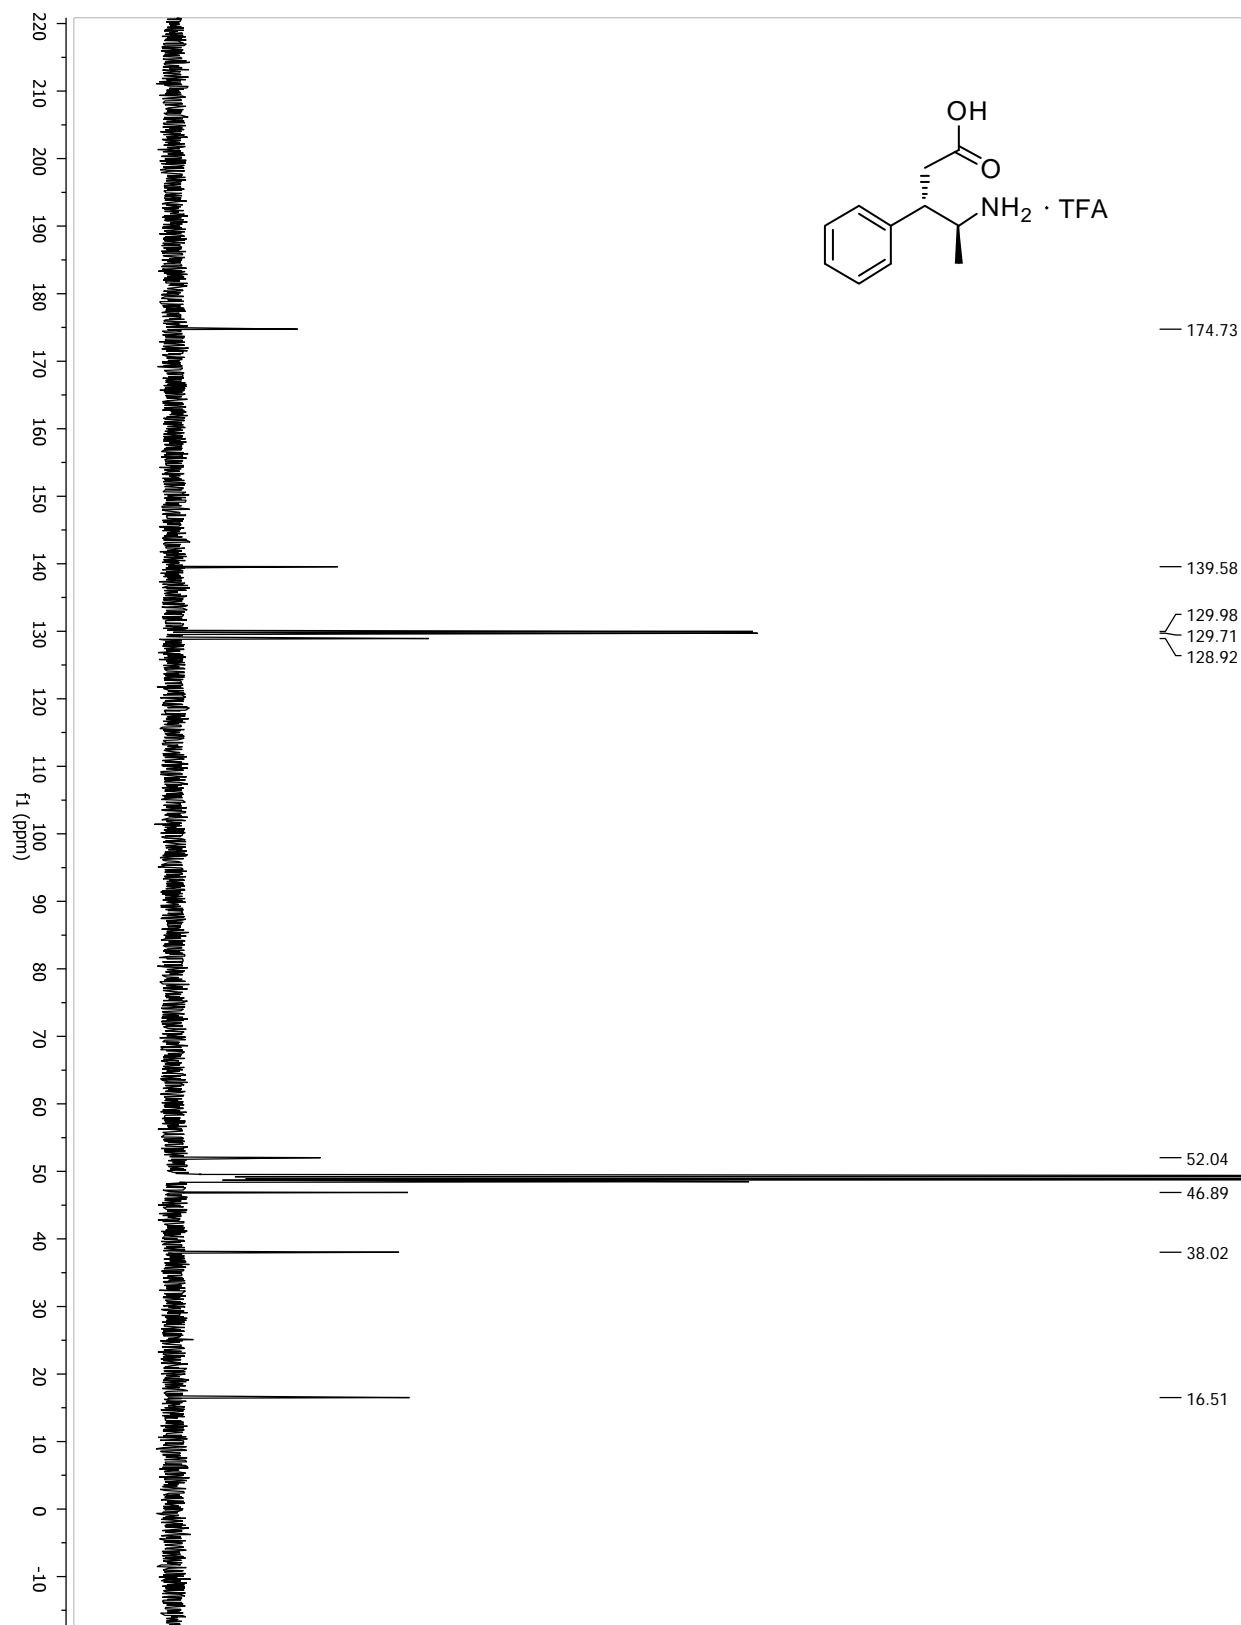

**Product 18:**

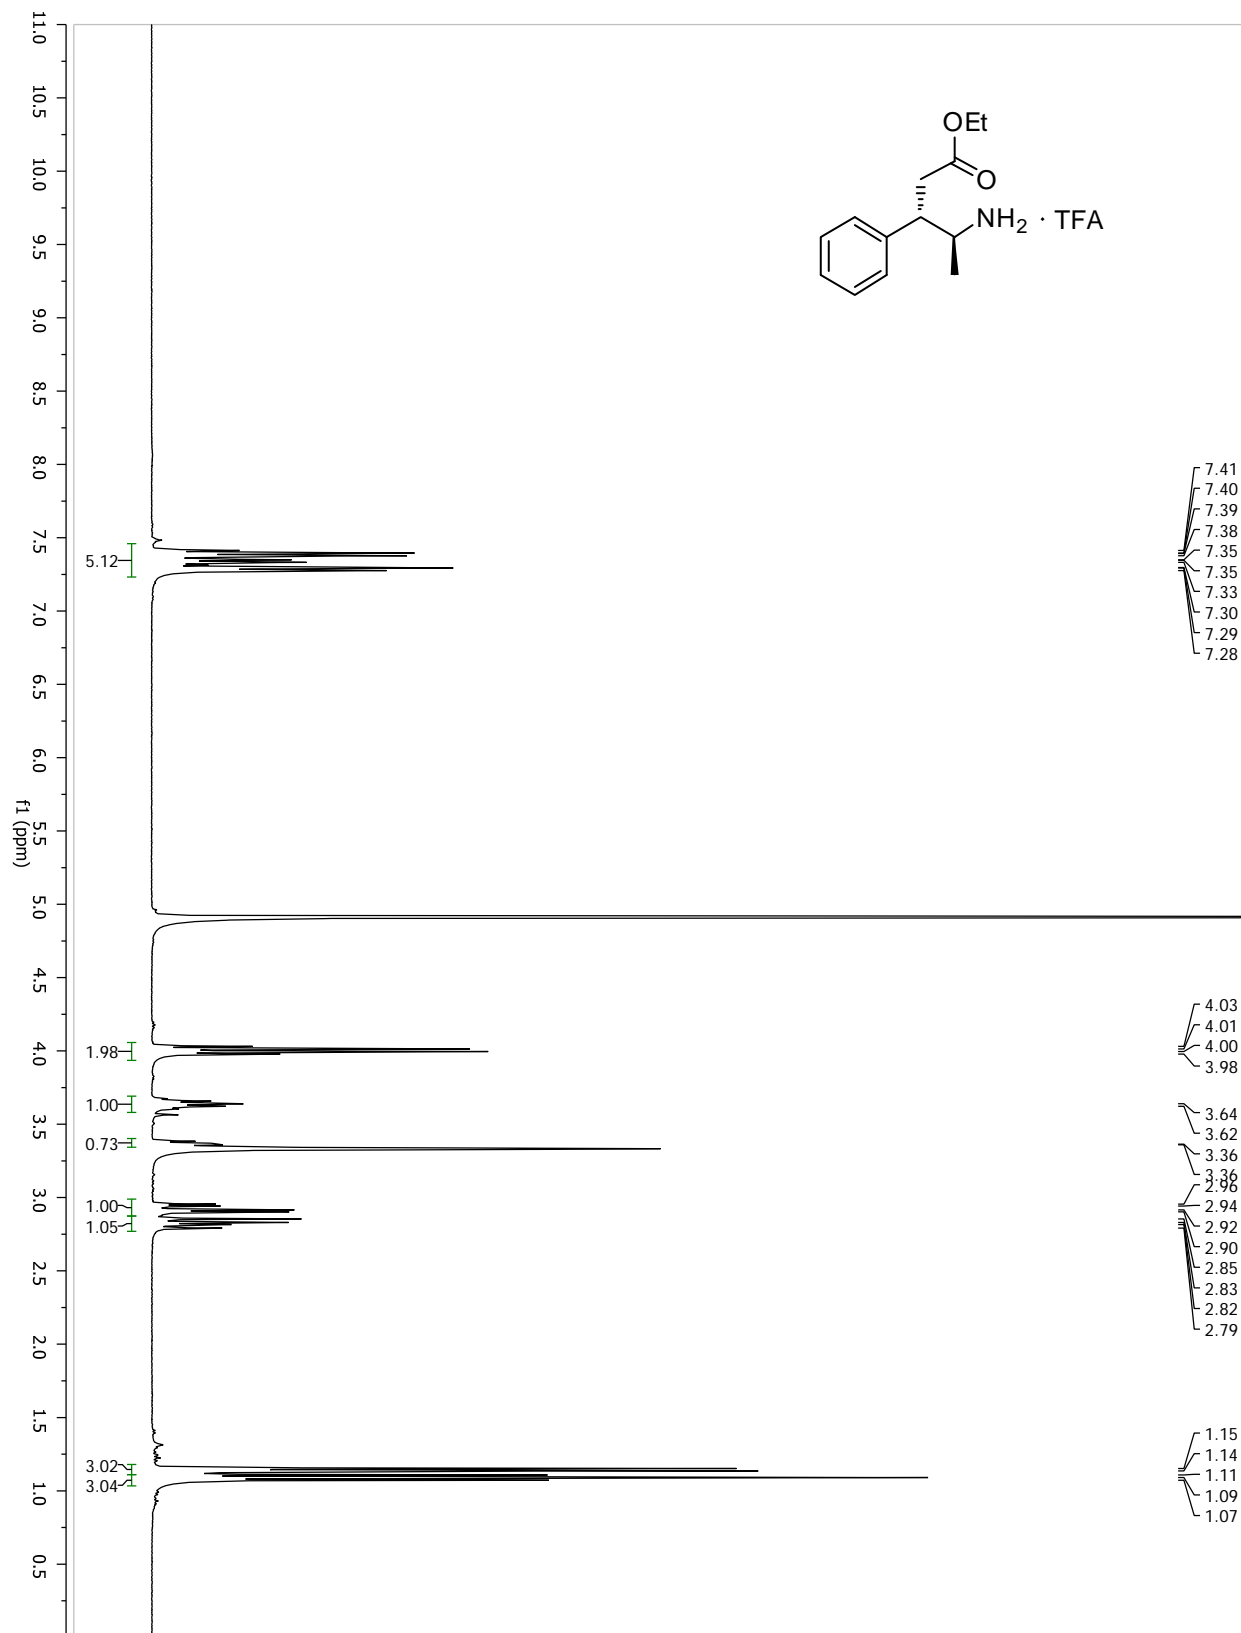

**Product 18:**

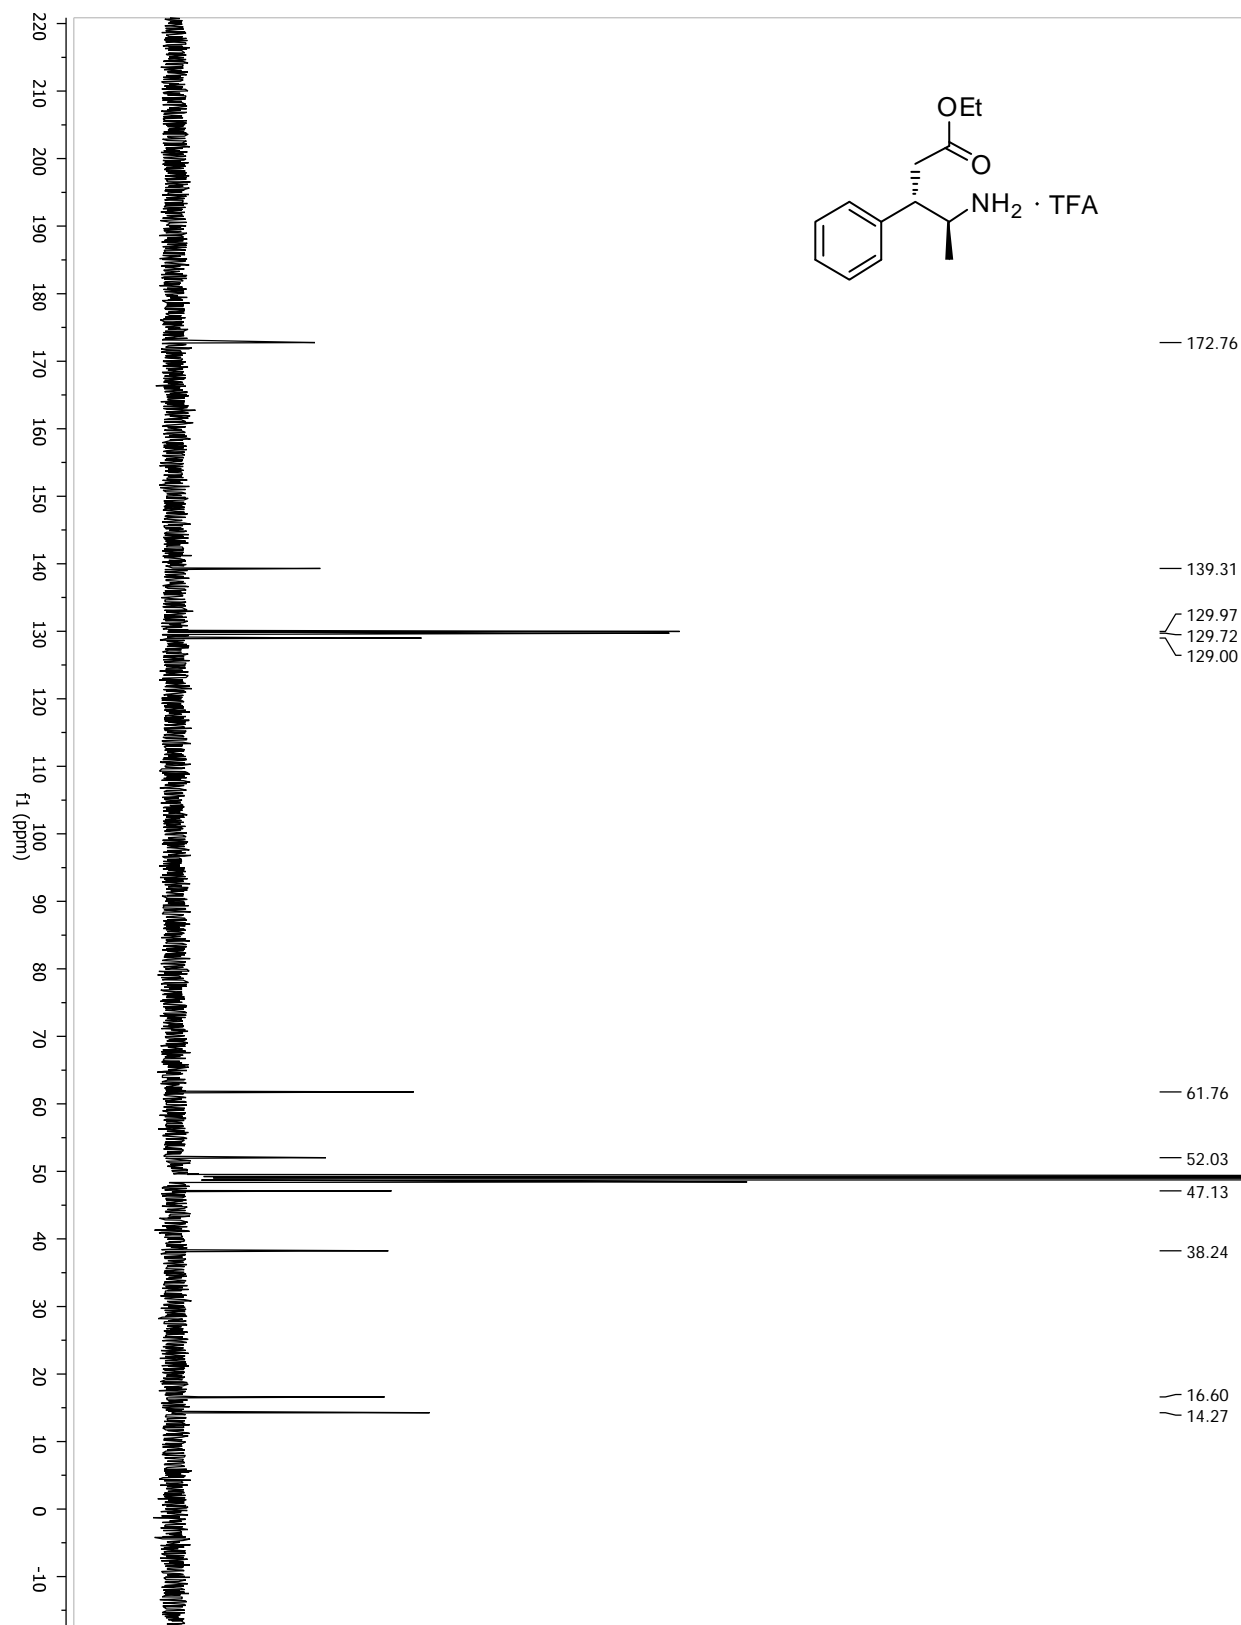



### sulfinyl urea 4

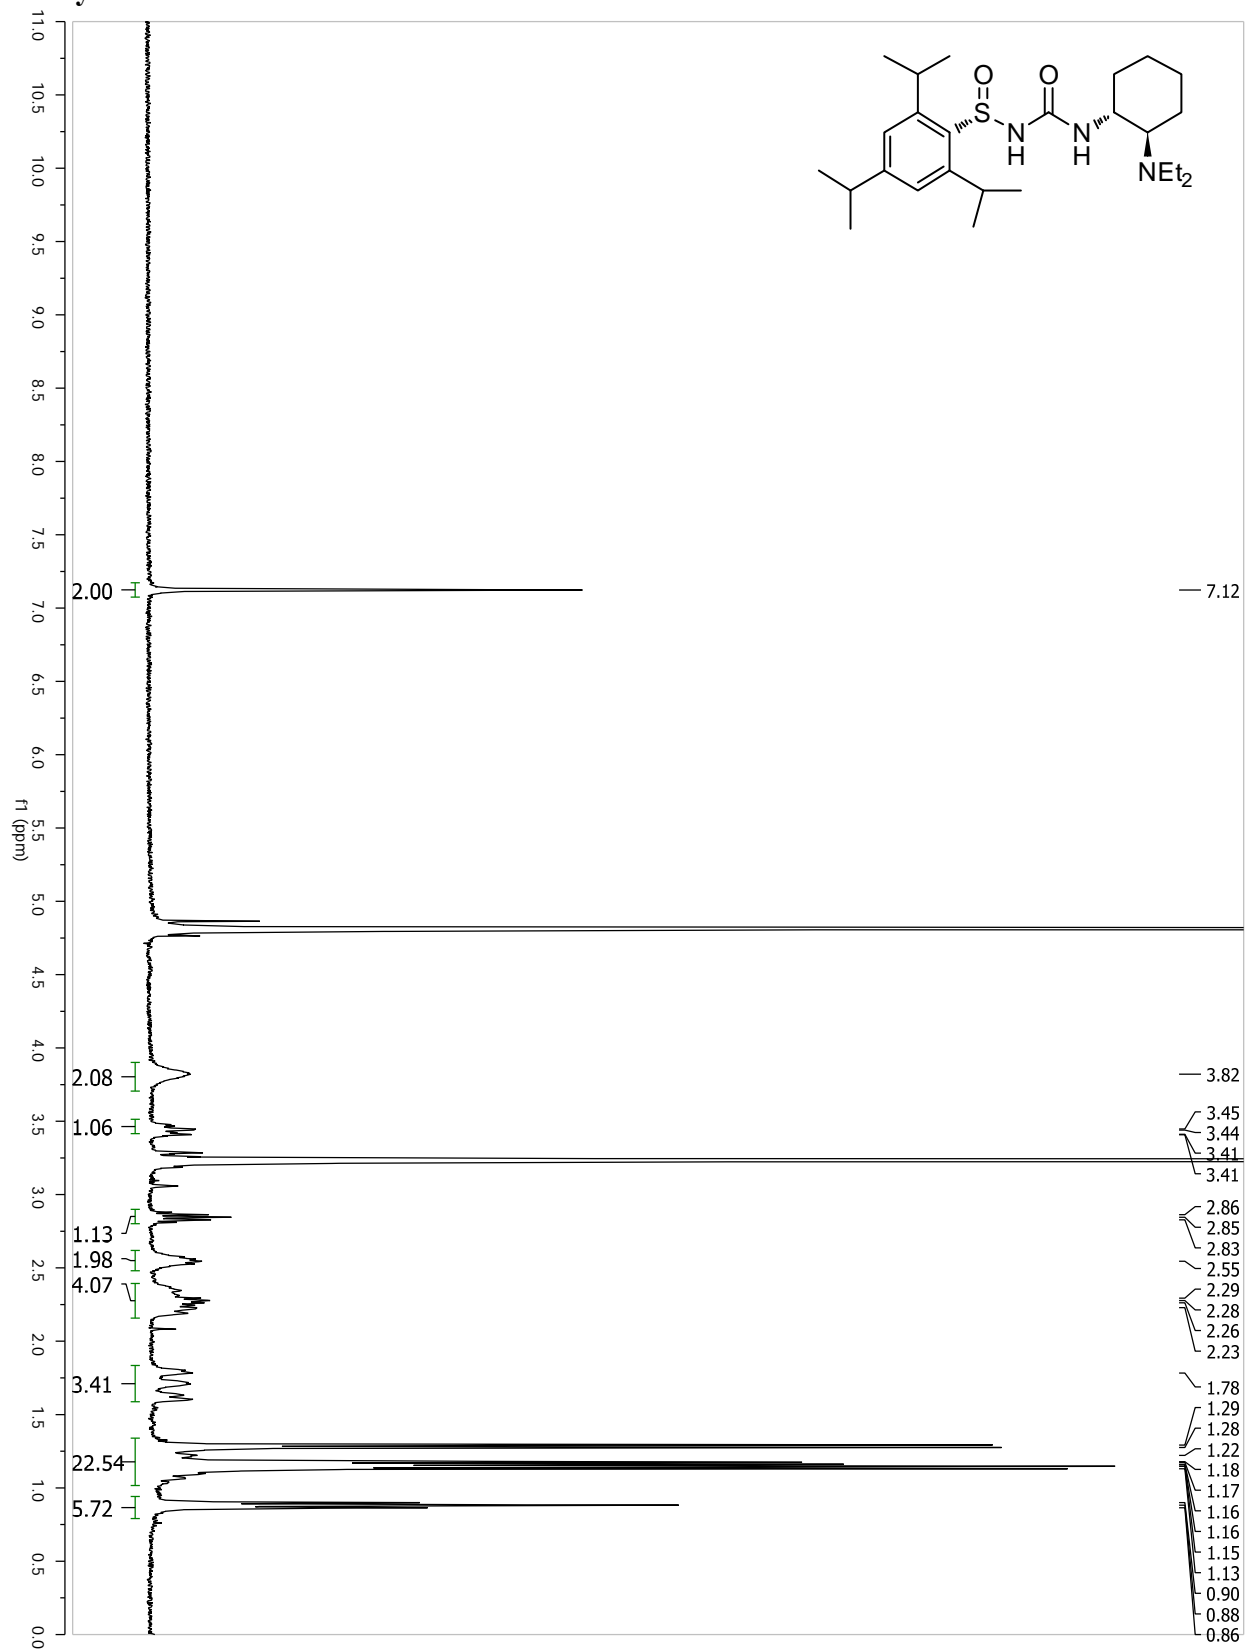

### sulfinyl urea 4

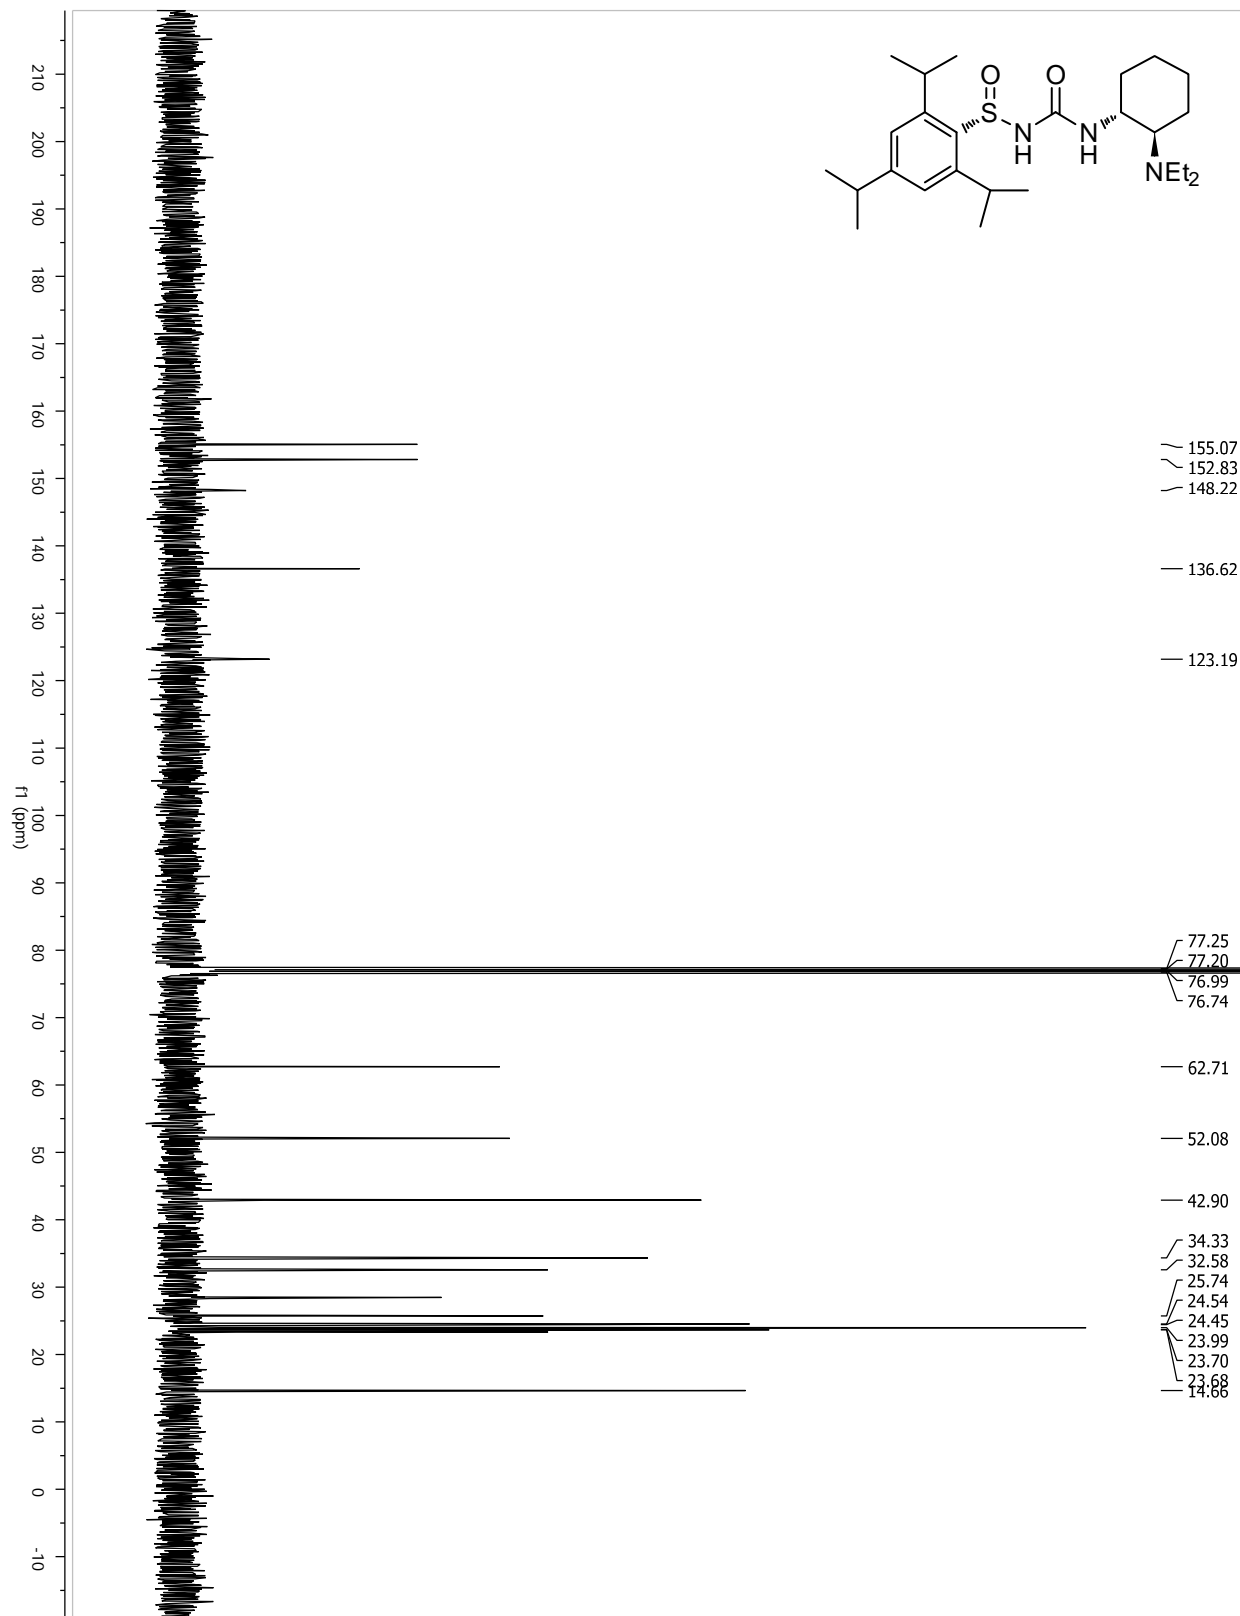

### sulfinyl urea 5

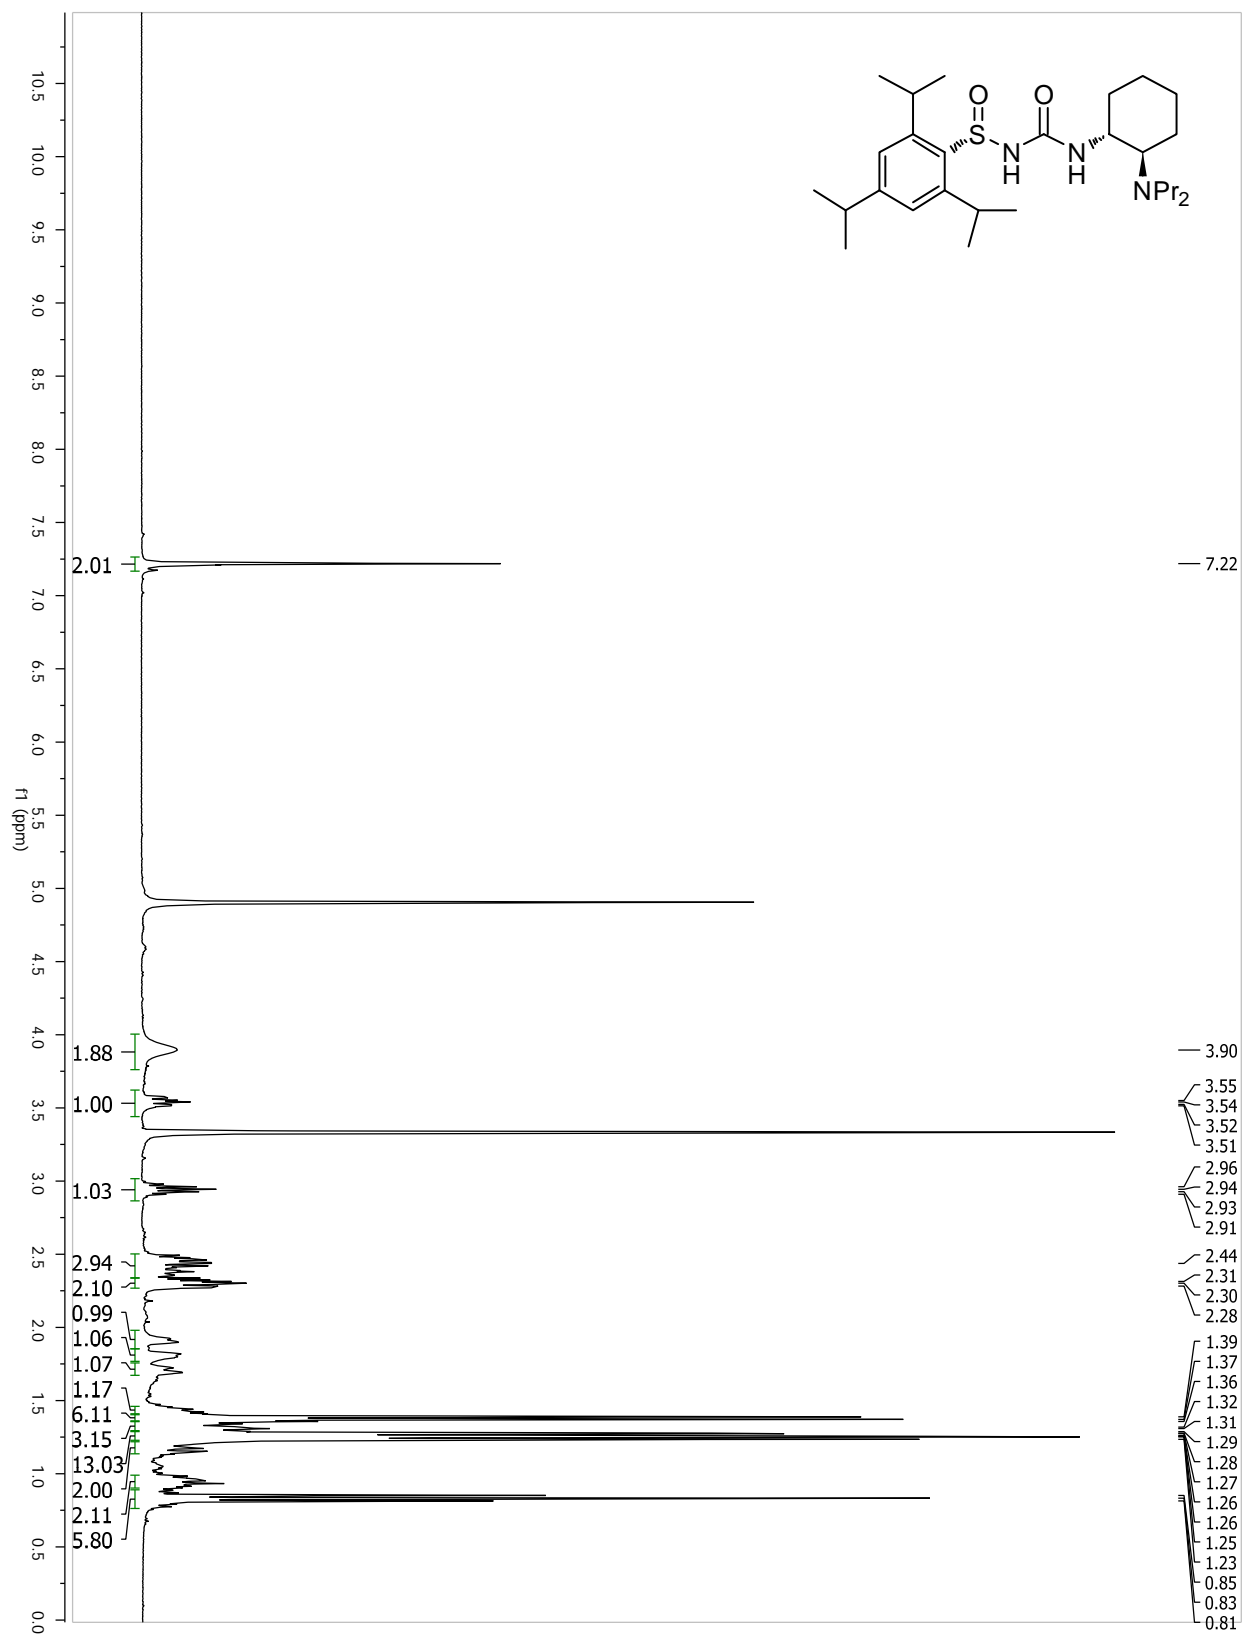

### sulfinyl urea 5

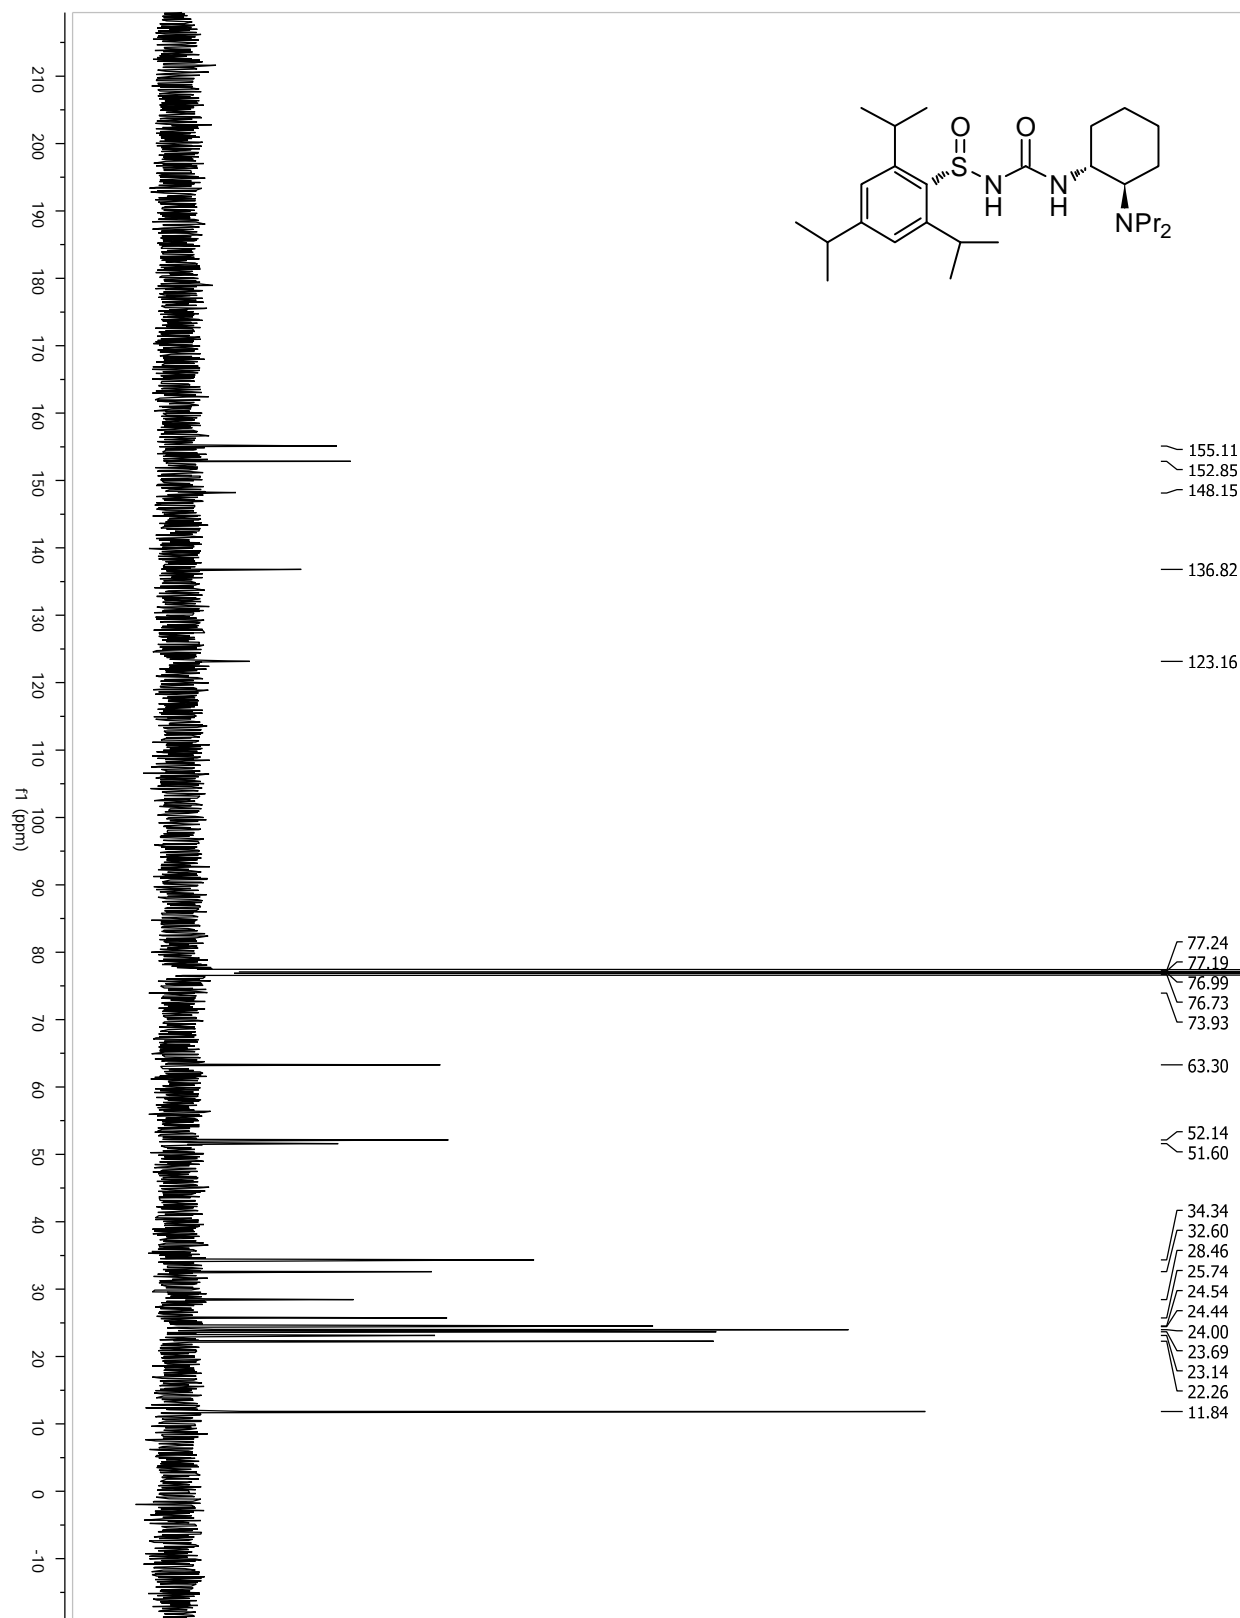

### sulfinyl urea 6

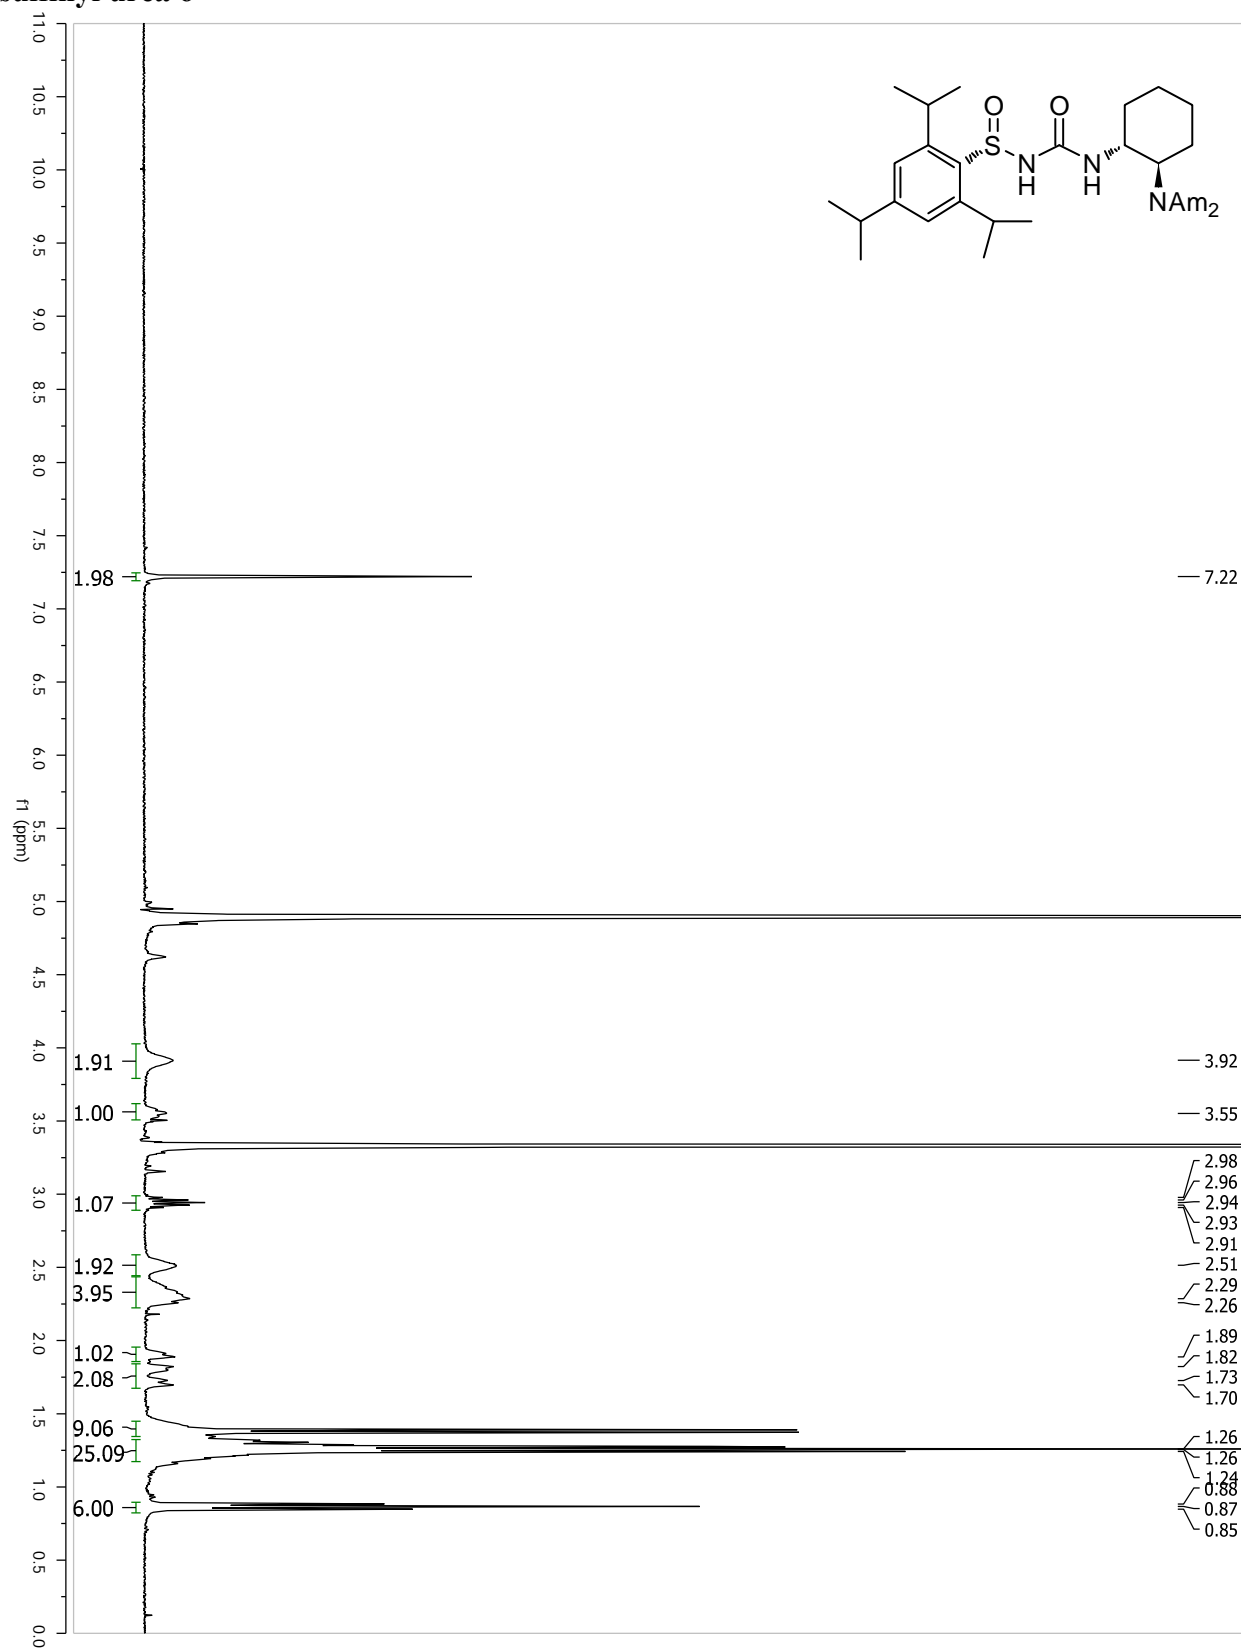

### sulfinyl urea 6

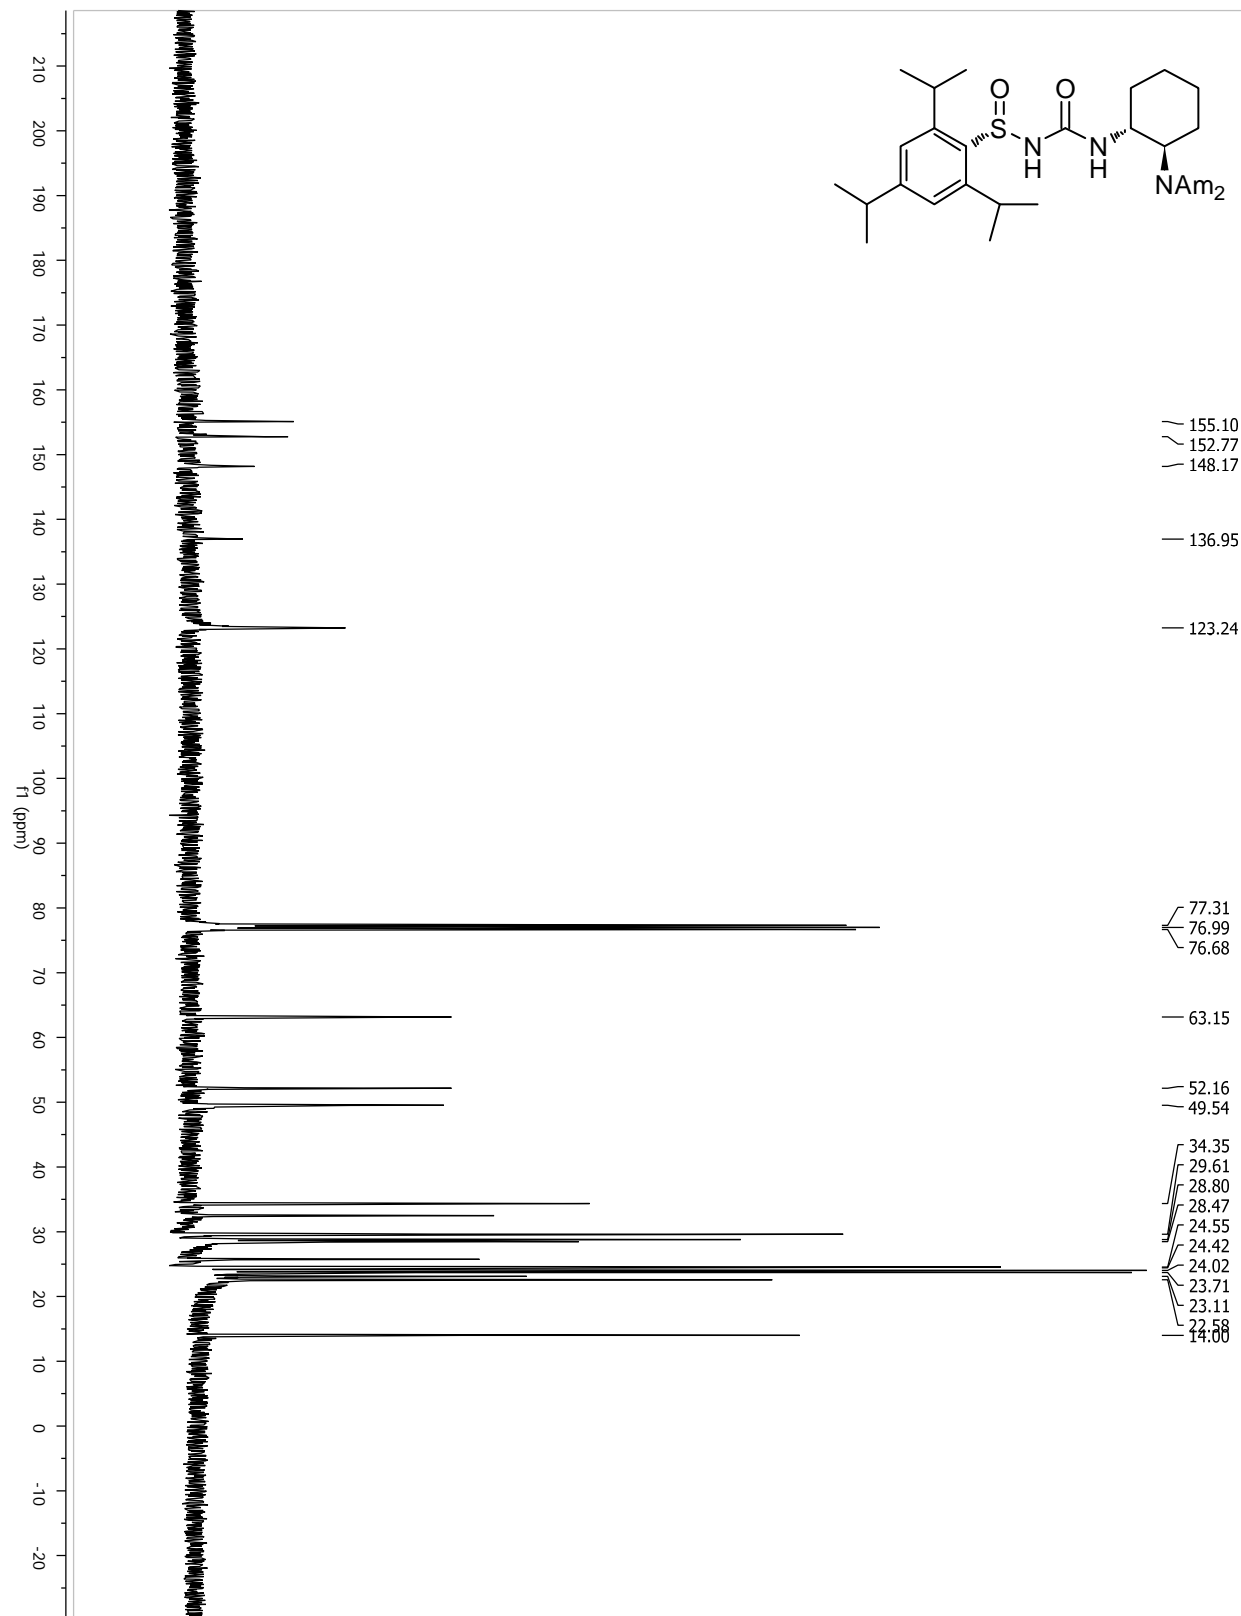

**sulfinyl urea 7**

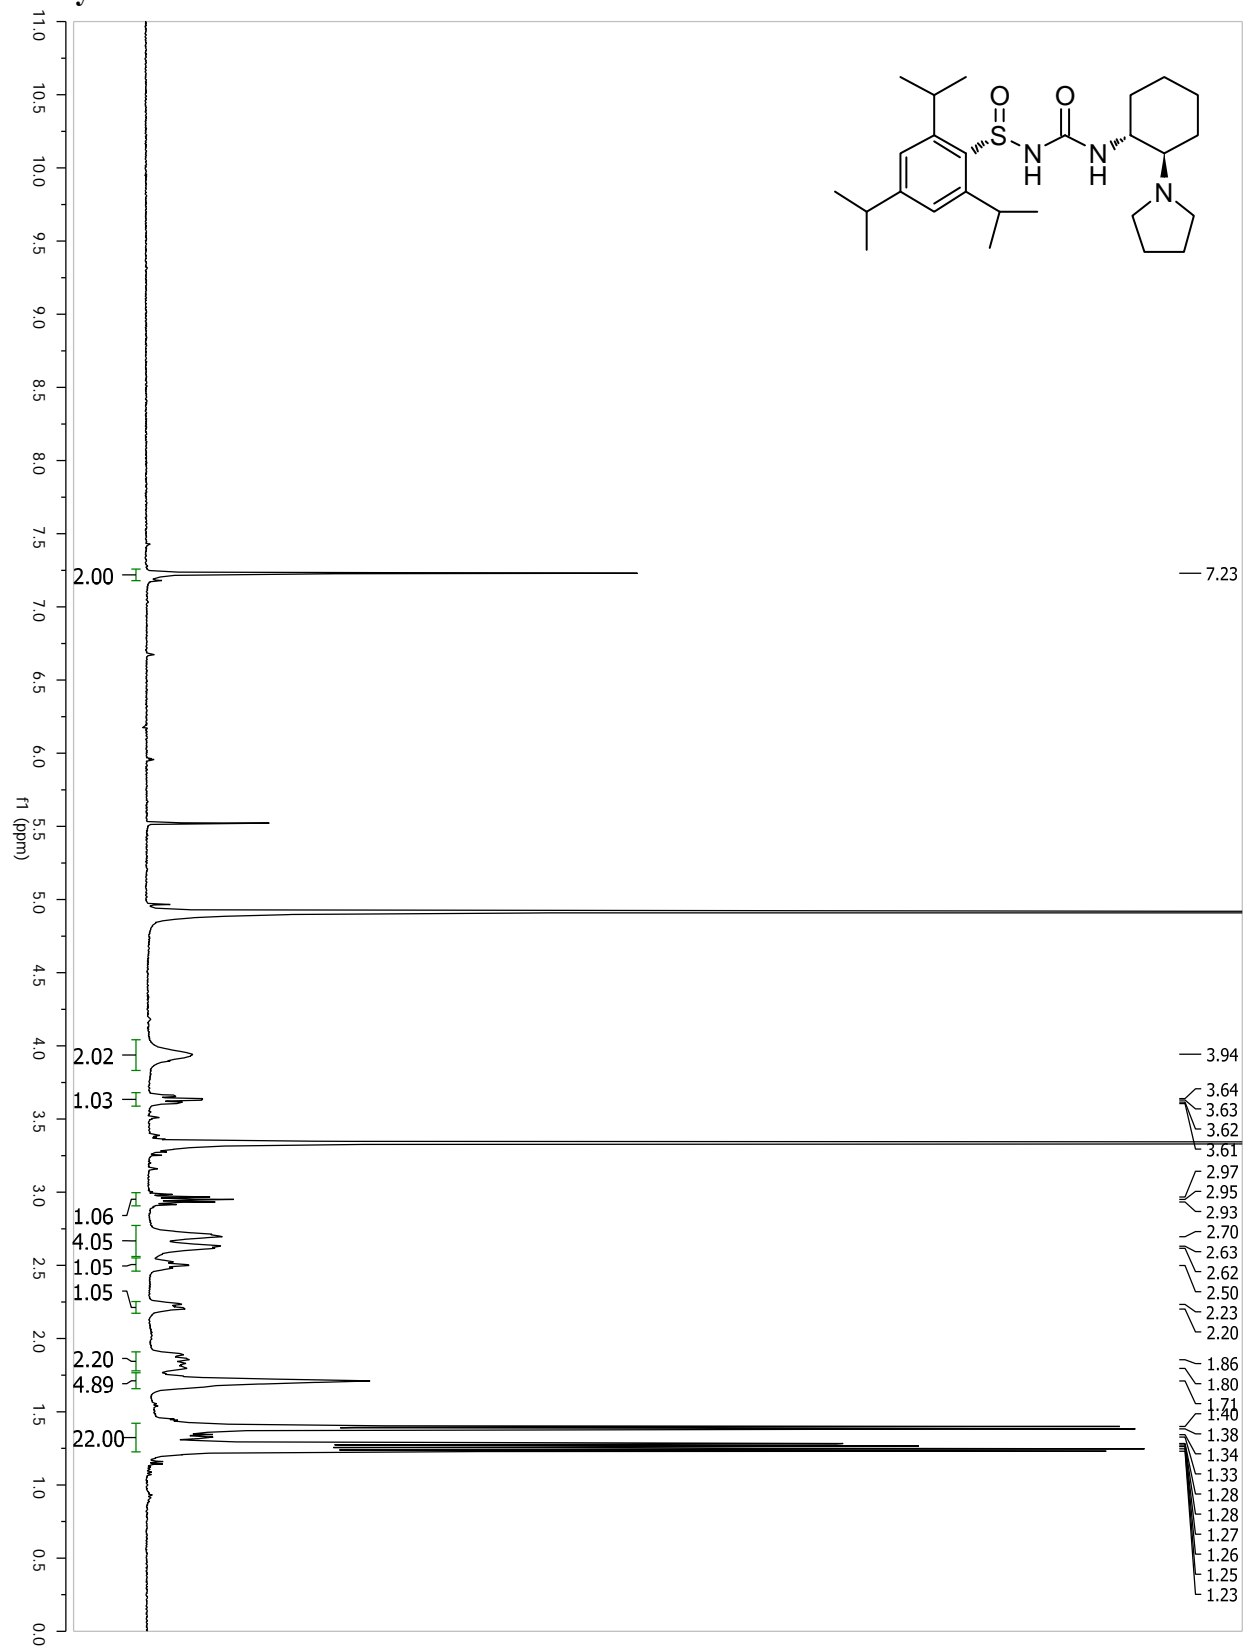

### sulfinyl urea 7

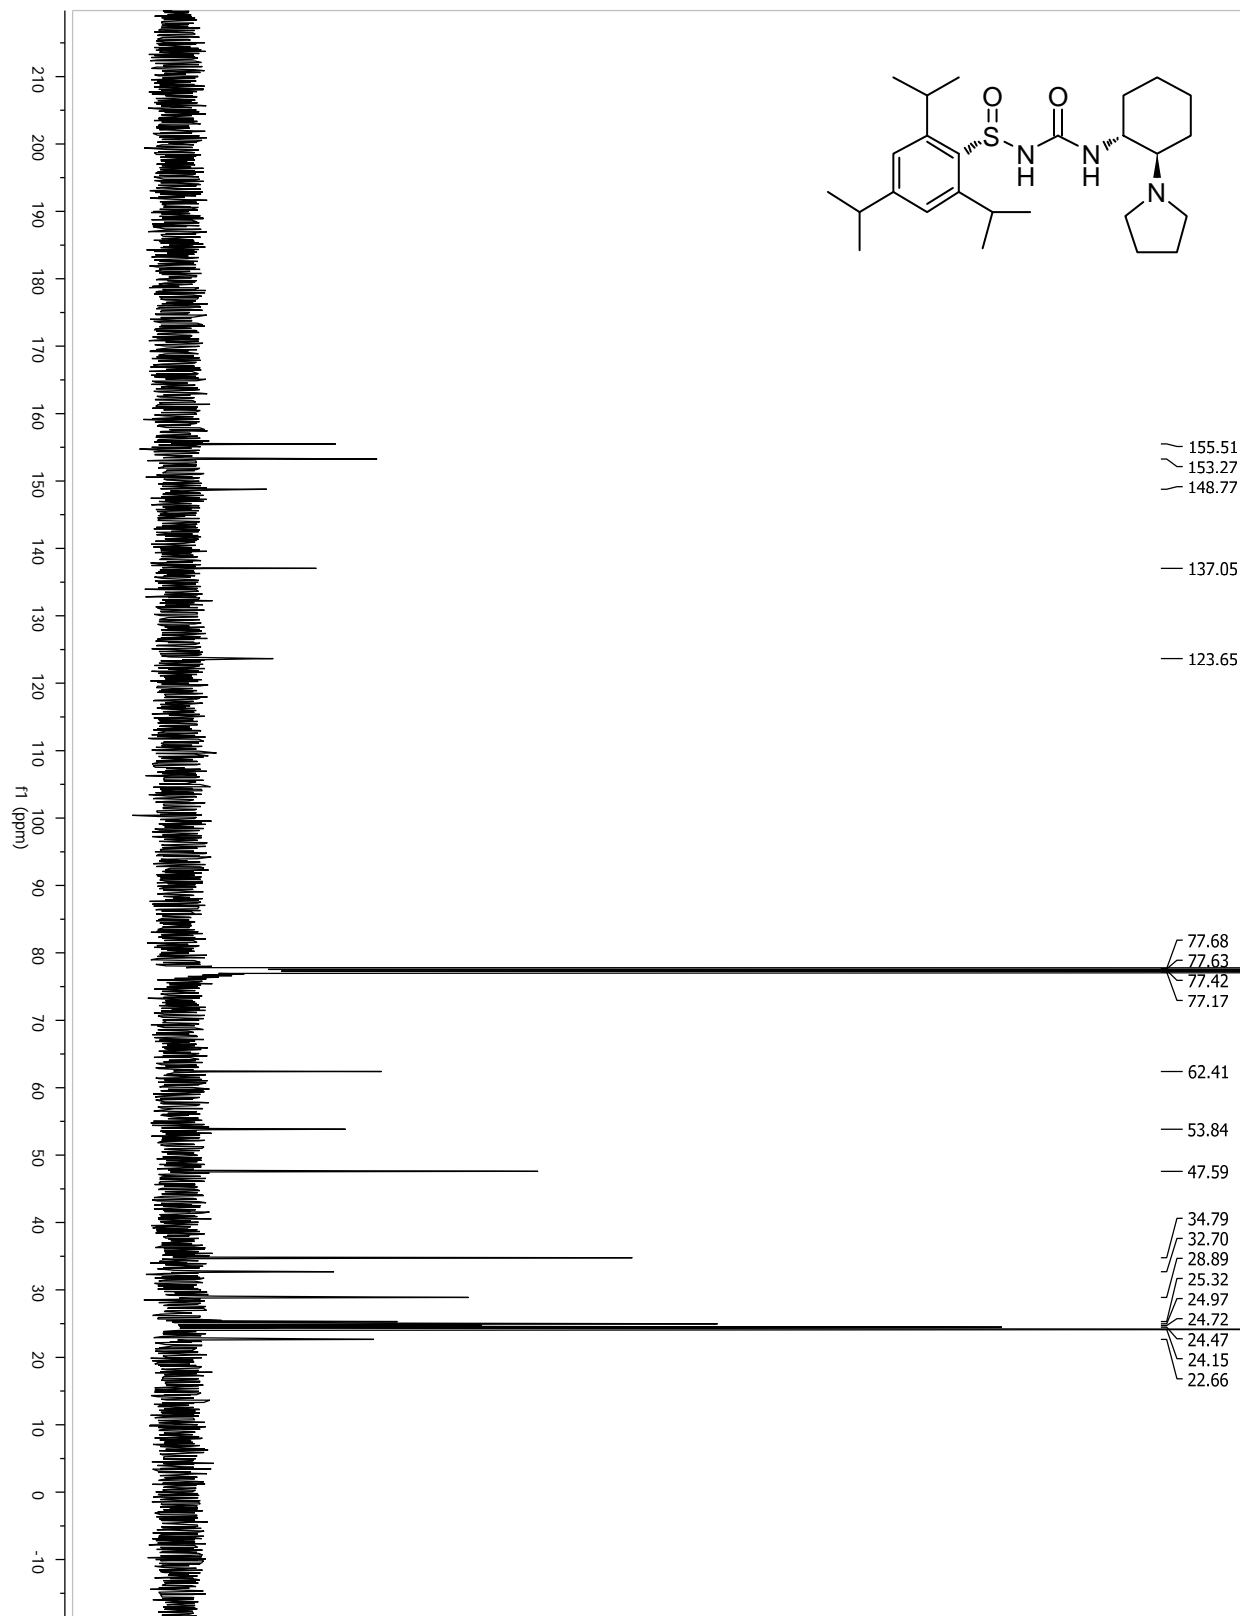



### sulfinyl urea 8

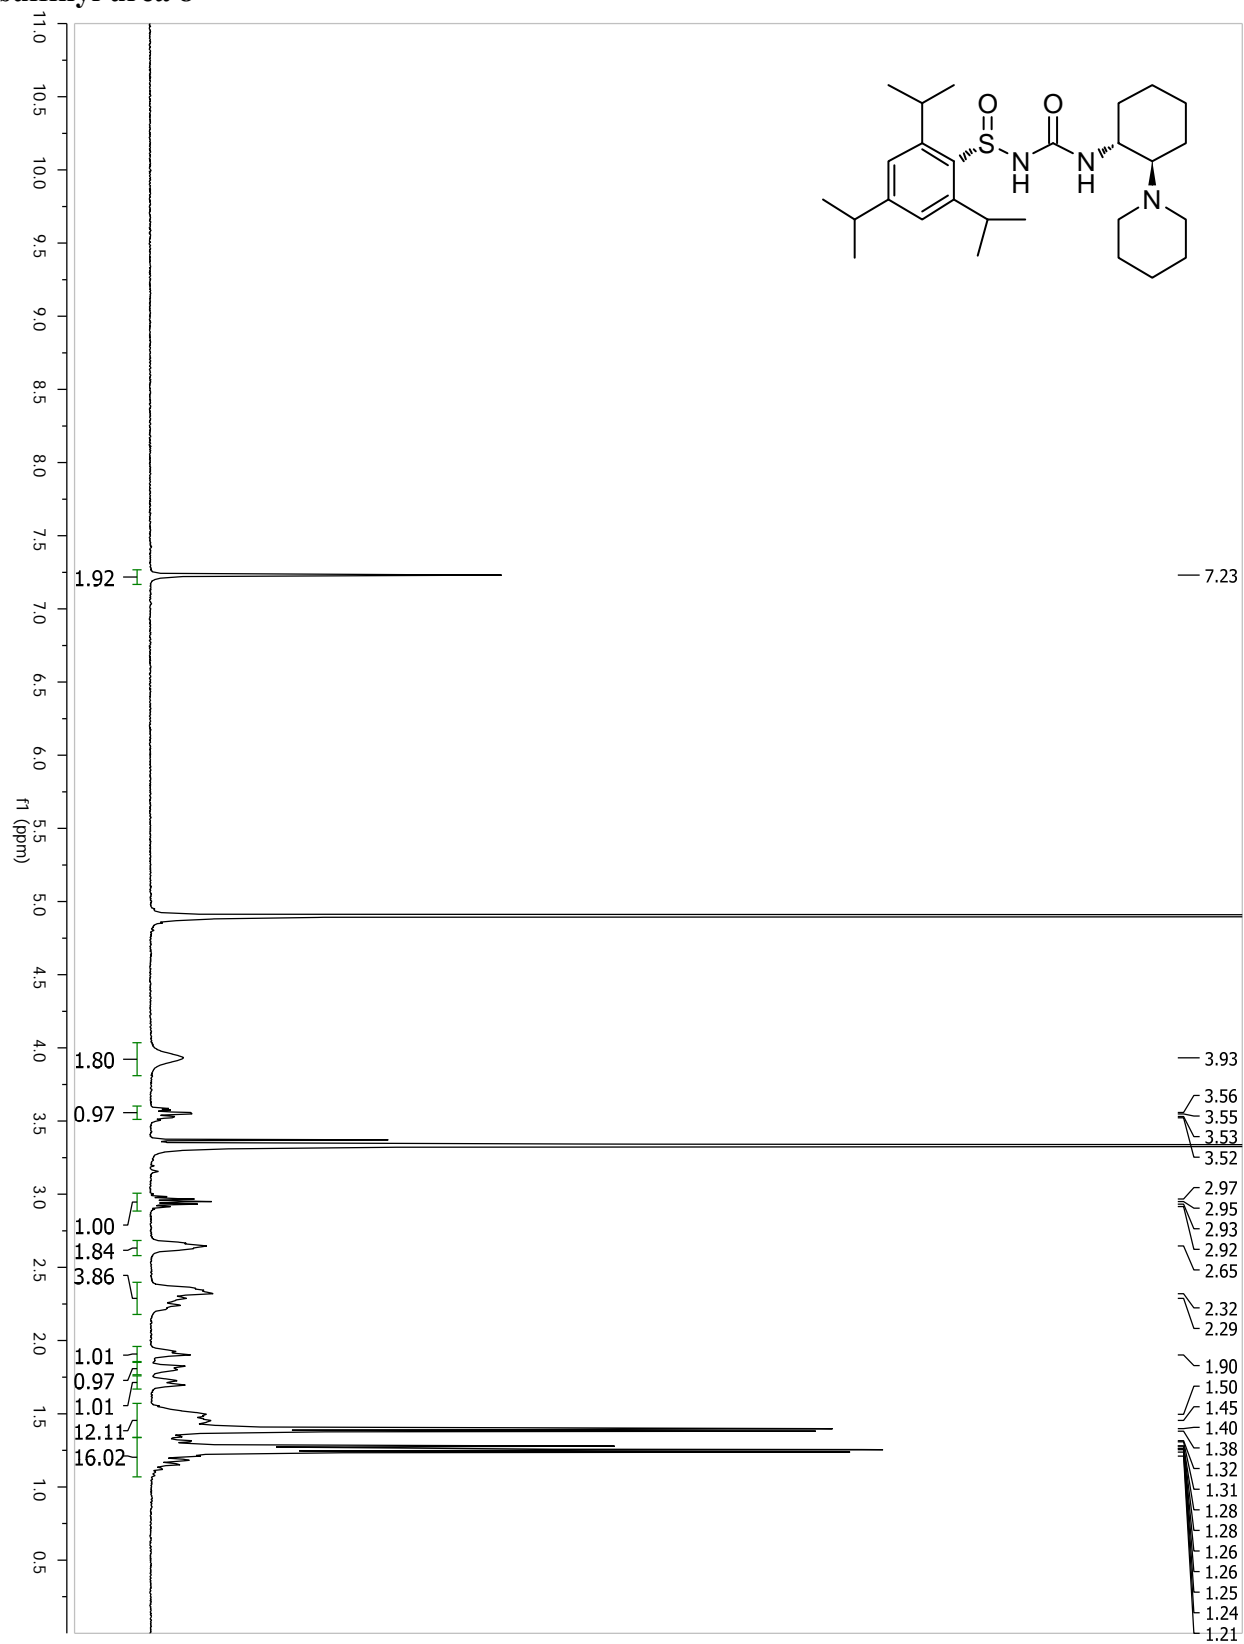

### sulfinyl urea 8

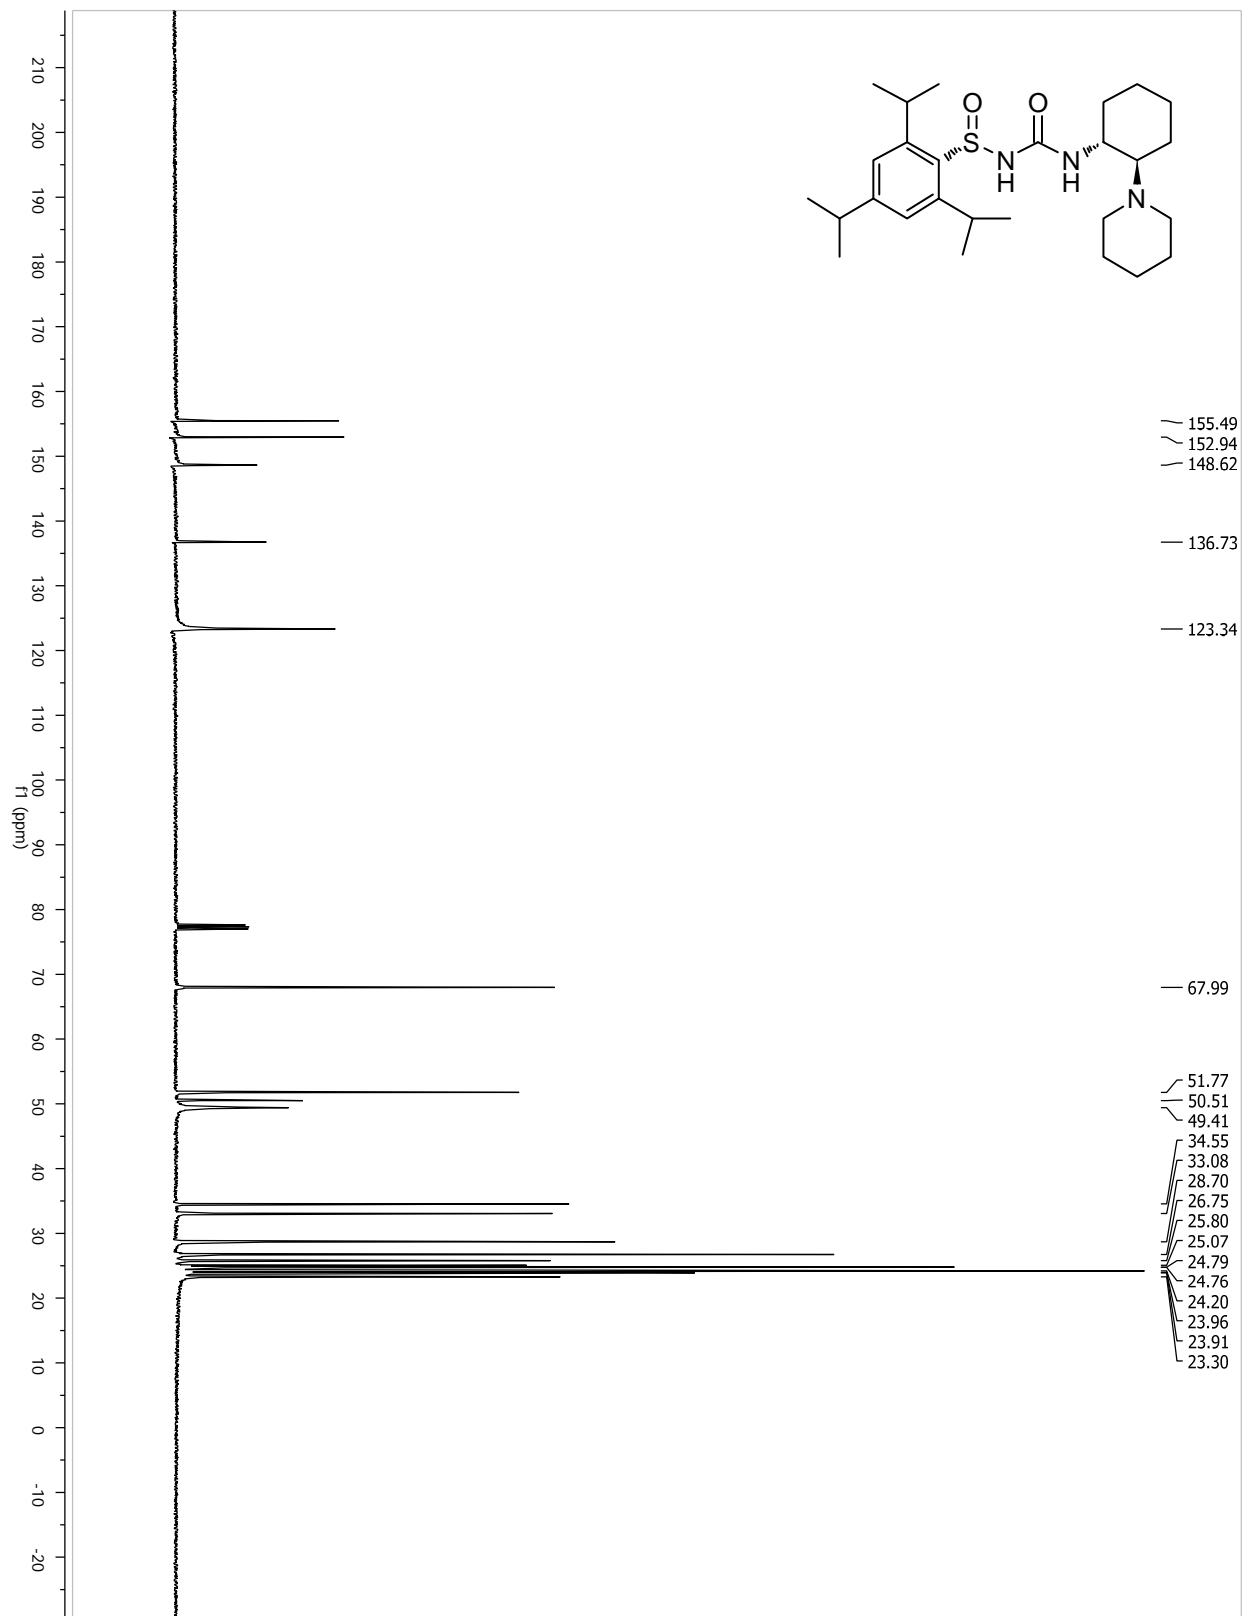

### sulfinyl urea 9

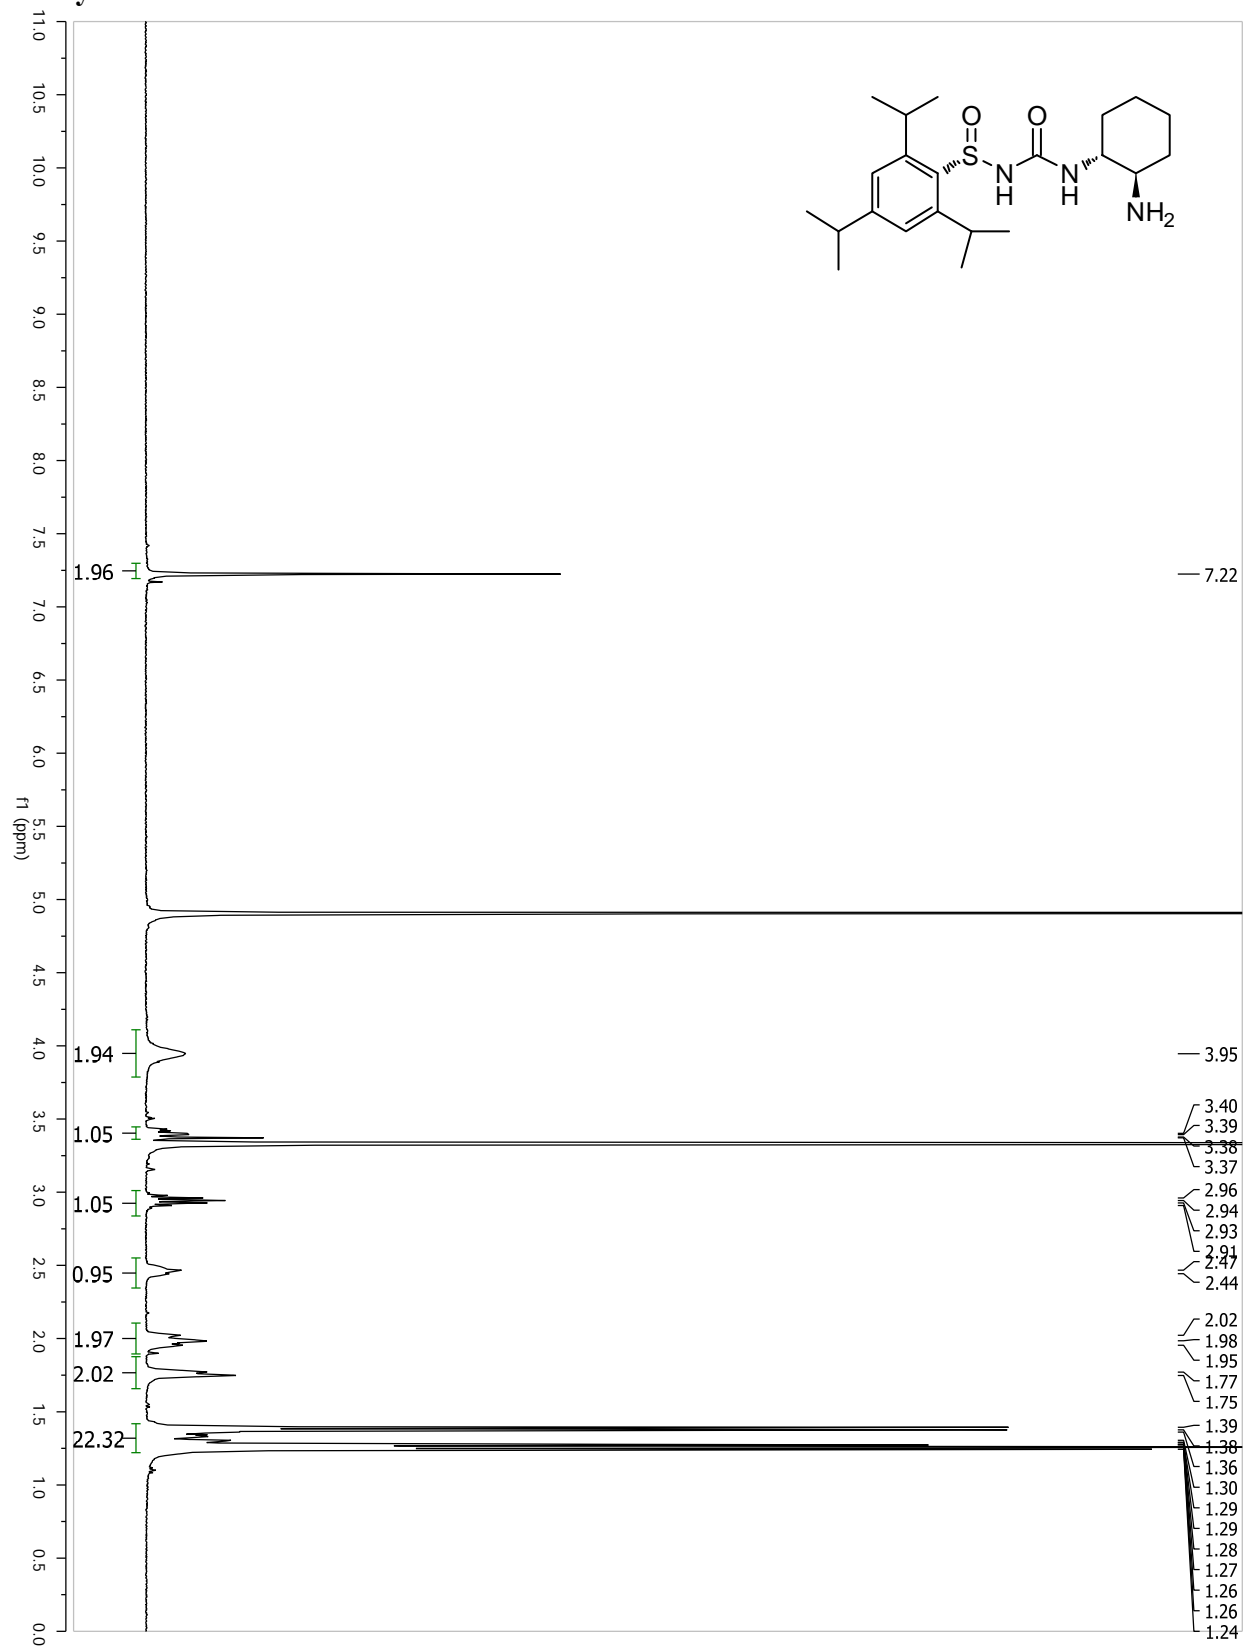

### sulfinyl urea 9

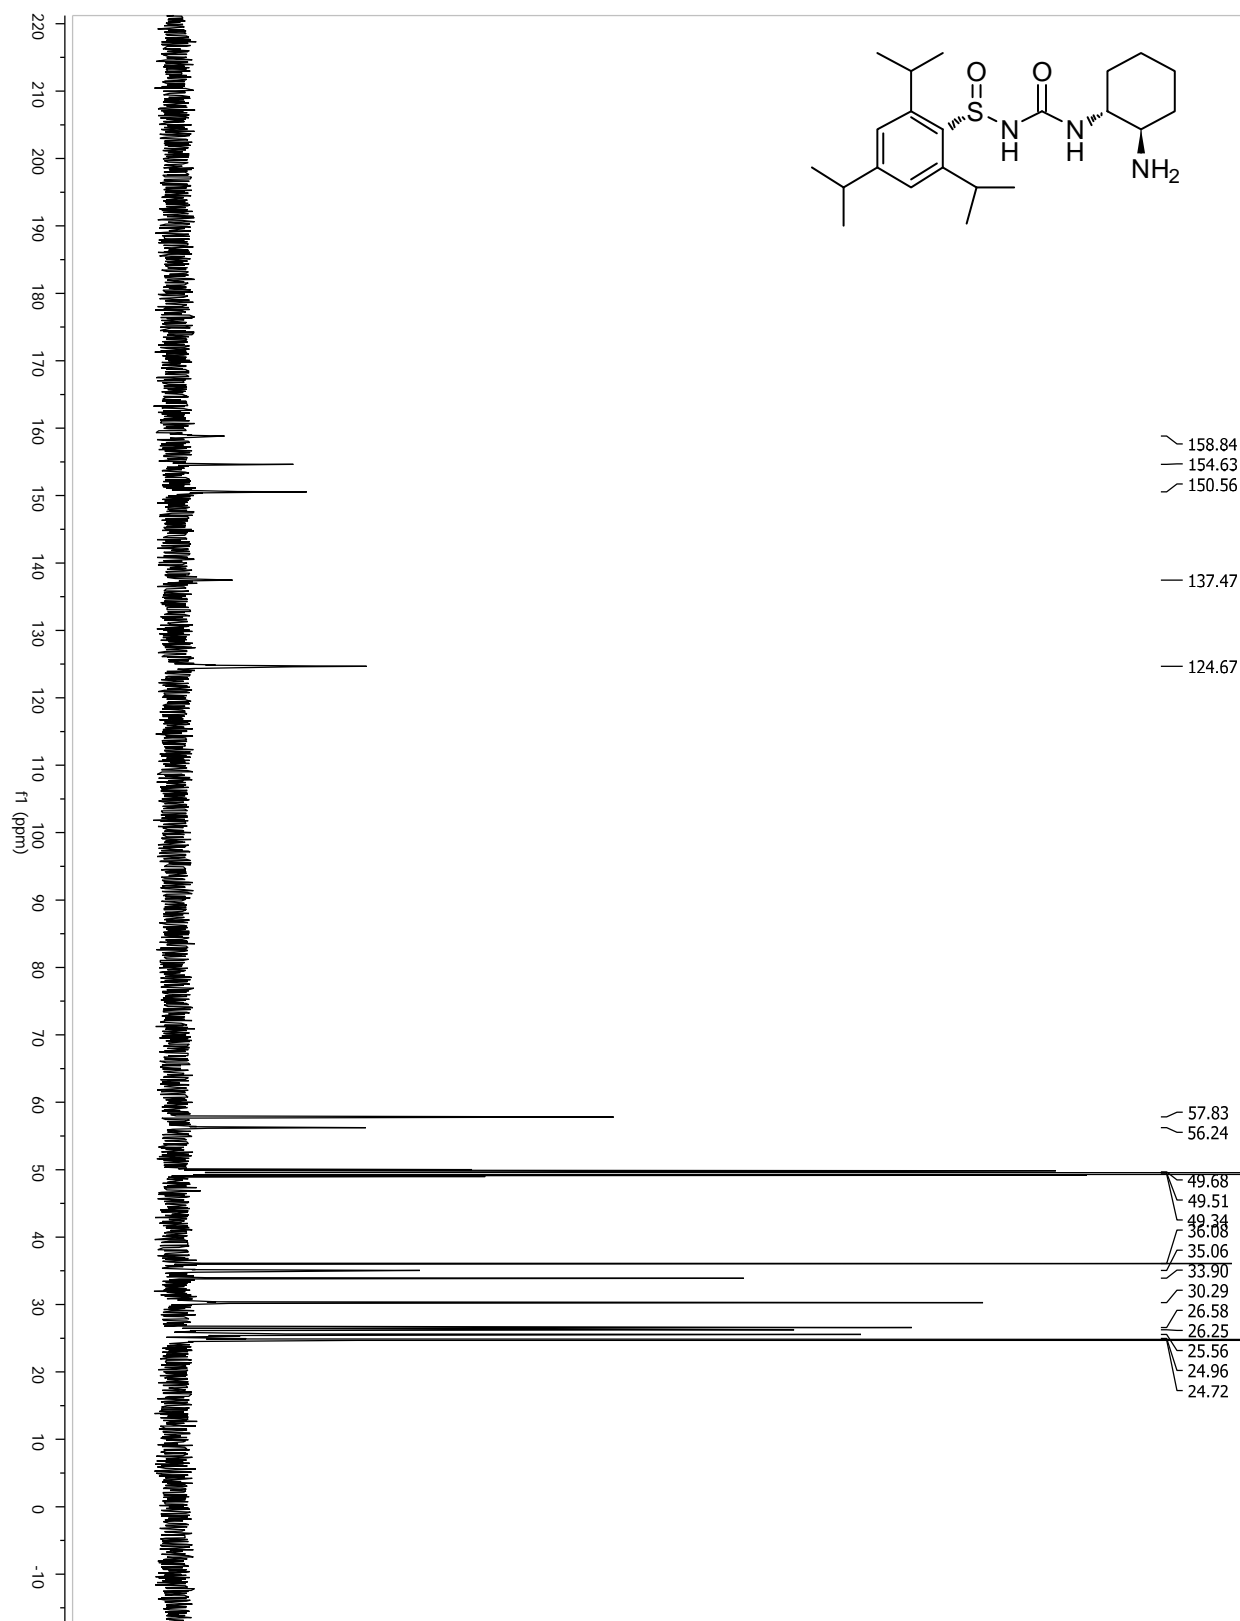

## Product 12a.

Racemic (Chiracel IA, 90(1% TFA):10 hexanes:IPA, 1 mL/min, 210 nm)

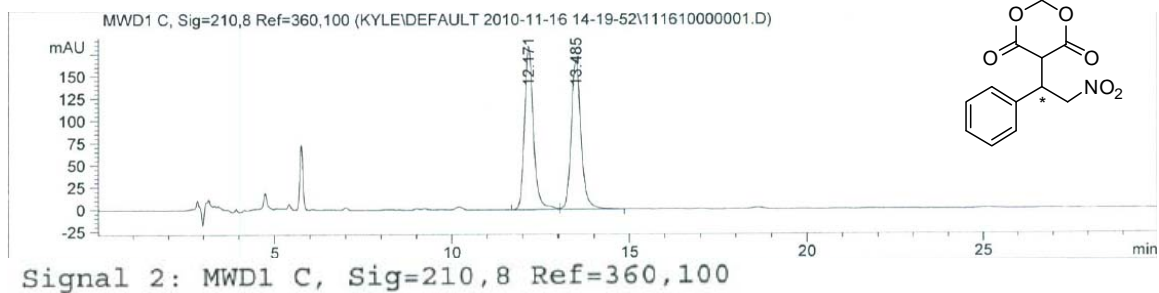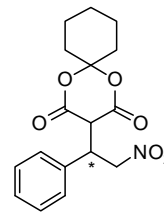

| Peak # | RetTime [min] | Type | Width [min] | Area [mAU*s] | Height [mAU] | Area %  |
|--------|---------------|------|-------------|--------------|--------------|---------|
| 1      | 12.171        | BV   | 0.2676      | 3249.64233   | 184.36560    | 49.9267 |
| 2      | 13.485        | VB   | 0.2911      | 3259.18848   | 168.95094    | 50.0733 |

Enantiomerically enriched (98% ee)

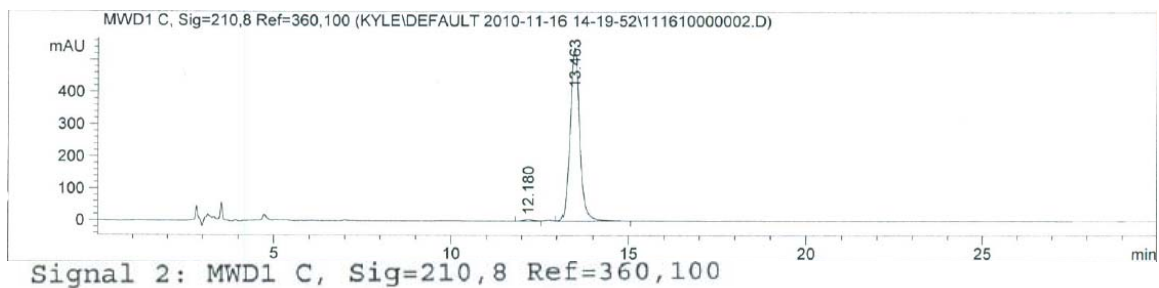

| Peak # | RetTime [min] | Type | Width [min] | Area [mAU*s] | Height [mAU] | Area %  |
|--------|---------------|------|-------------|--------------|--------------|---------|
| 1      | 12.180        | BV   | 0.2718      | 106.10869    | 5.95597      | 1.0279  |
| 2      | 13.463        | VB   | 0.2861      | 1.02169e4    | 541.54675    | 98.9721 |

## Product 12b.

Racemic (Chiracel IA, 90(1% TFA):10 hexanes:IPA, 1 mL/min, 210 nm)

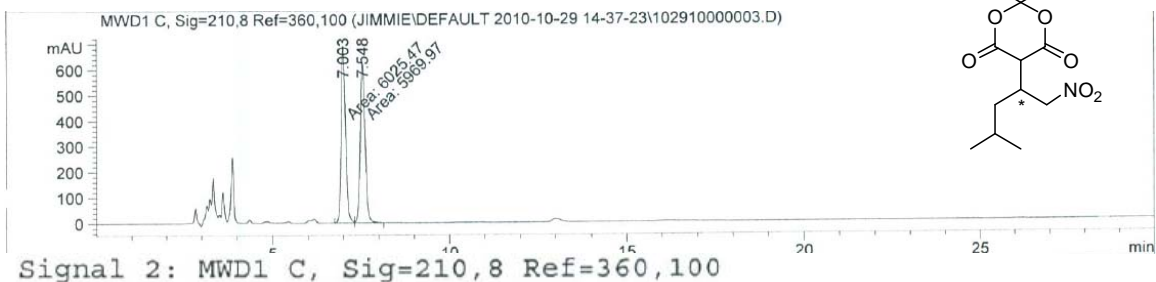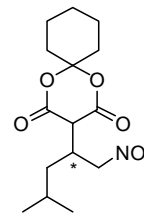

| Peak # | RetTime [min] | Type | Width [min] | Area [mAU*s] | Height [mAU] | Area %  |
|--------|---------------|------|-------------|--------------|--------------|---------|
| 1      | 7.003         | MF   | 0.1457      | 6025.46875   | 689.20428    | 50.2313 |
| 2      | 7.548         | FM   | 0.1579      | 5969.97217   | 629.99774    | 49.7687 |

Enantiomerically enriched (94% ee)

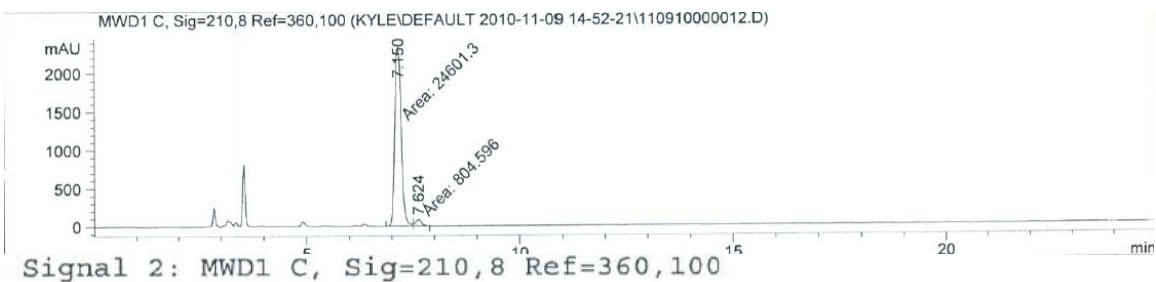

| Peak # | RetTime [min] | Type | Width [min] | Area [mAU*s] | Height [mAU] | Area %  |
|--------|---------------|------|-------------|--------------|--------------|---------|
| 1      | 7.150         | MM   | 0.1753      | 2.46013e4    | 2338.92871   | 96.8330 |
| 2      | 7.624         | MM   | 0.1604      | 804.59576    | 83.61231     | 3.1670  |

## Product 12c.

Racemic (Chiracel IA, 90(1% TFA):10 hexanes:IPA, 1 mL/min, 210 nm)

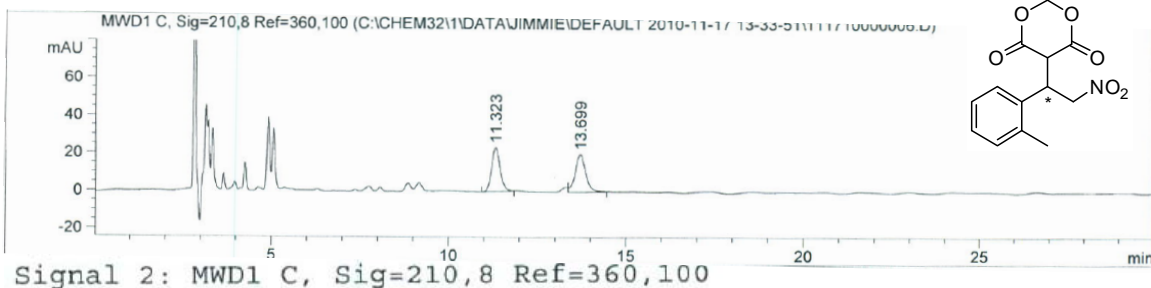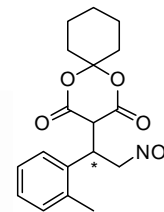

| Peak # | RetTime [min] | Type | Width [min] | Area [mAU*s] | Height [mAU] | Area %  |
|--------|---------------|------|-------------|--------------|--------------|---------|
| 1      | 11.323        | BB   | 0.2513      | 383.11395    | 23.36245     | 48.4374 |
| 2      | 13.699        | VB   | 0.3081      | 407.83191    | 19.98423     | 51.5626 |

Enantiomerically enriched (96% ee)

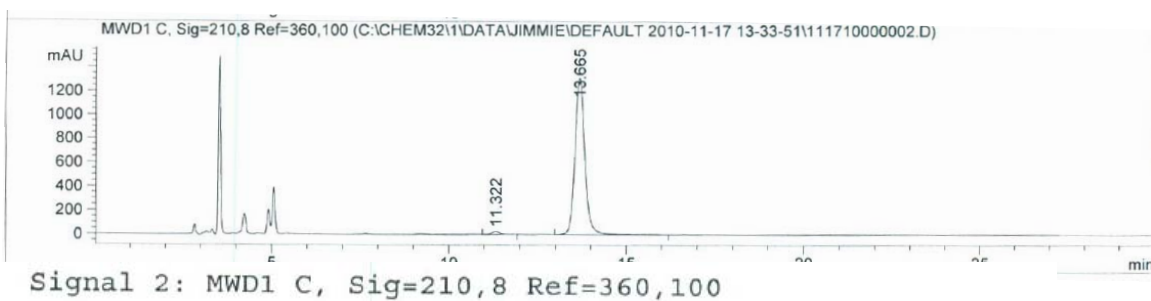

| Peak # | RetTime [min] | Type | Width [min] | Area [mAU*s] | Height [mAU] | Area %  |
|--------|---------------|------|-------------|--------------|--------------|---------|
| 1      | 11.322        | VB   | 0.2593      | 428.82278    | 25.09845     | 1.6539  |
| 2      | 13.665        | VB   | 0.2965      | 2.54998e4    | 1313.40662   | 98.3461 |

**Product 12d.**

Racemic (Chiracel IA, 90(1% TFA):10 hexanes:IPA, 1 mL/min, 210 nm)

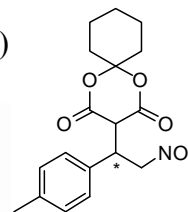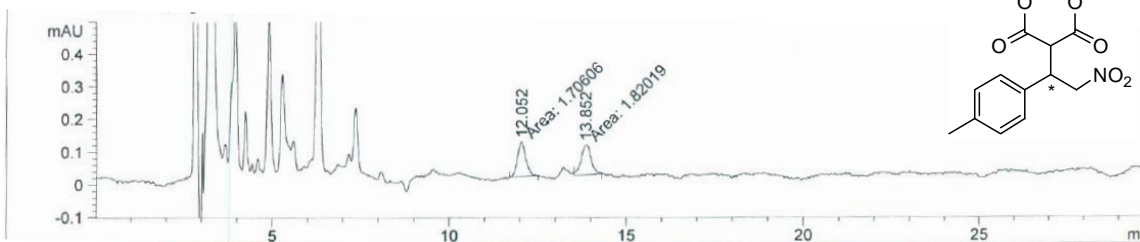

| Peak # | RetTime [min] | Type | Width [min] | Area [mAU*s] | Height [mAU] | Area %  |
|--------|---------------|------|-------------|--------------|--------------|---------|
| 1      | 12.052        | MM   | 0.2706      | 1.70606      | 1.05070e-1   | 48.3818 |
| 2      | 13.852        | MM   | 0.3297      | 1.82019      | 9.20134e-2   | 51.6182 |

Enantiomerically enriched (98% ee)

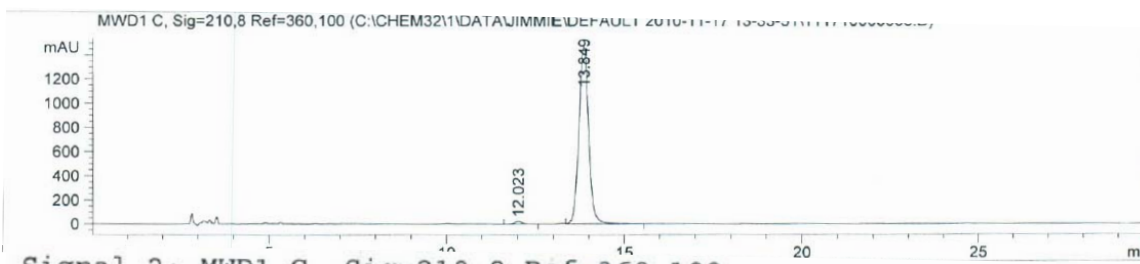

Signal 2: MWD1 C, Sig=210,8 Ref=360,100

| Peak # | RetTime [min] | Type | Width [min] | Area [mAU*s] | Height [mAU] | Area %  |
|--------|---------------|------|-------------|--------------|--------------|---------|
| 1      | 12.023        | VB   | 0.2556      | 346.48251    | 20.88085     | 1.2140  |
| 2      | 13.849        | VB   | 0.2962      | 2.81935e4    | 1467.31274   | 98.7860 |



## Product 12e.

Racemic (Chiracel IA, 92(1% TFA):8 hexanes:EtOH, 1 mL/min, 210 nm)

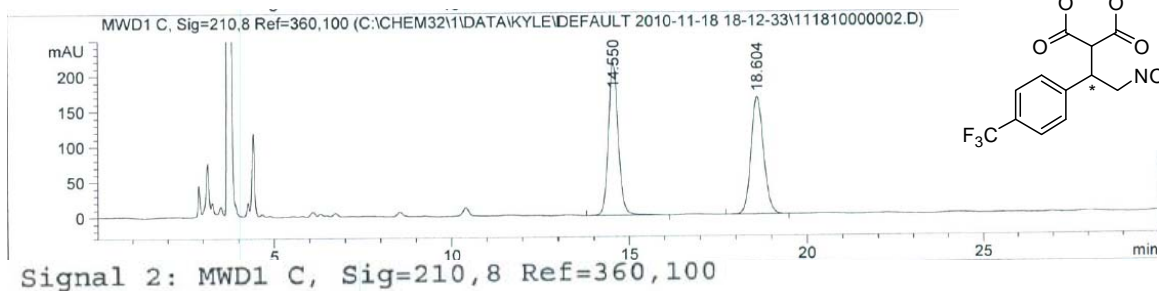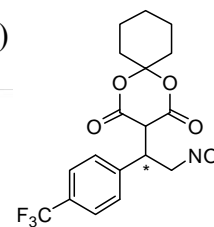

| Peak # | RetTime [min] | Type | Width [min] | Area [mAU*s] | Height [mAU] | Area %  |
|--------|---------------|------|-------------|--------------|--------------|---------|
| 1      | 14.550        | VB   | 0.2964      | 4225.37012   | 217.72339    | 50.5719 |
| 2      | 18.604        | VB   | 0.3800      | 4129.80078   | 167.31418    | 49.4281 |

Enantiomerically enriched (98% ee)

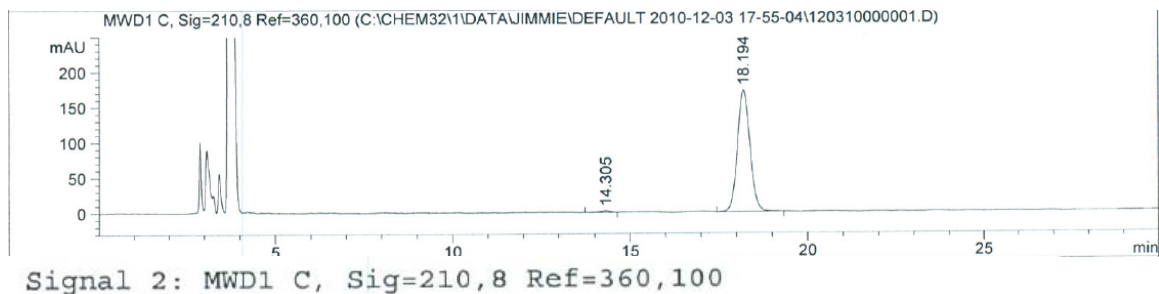

| Peak # | RetTime [min] | Type | Width [min] | Area [mAU*s] | Height [mAU] | Area %  |
|--------|---------------|------|-------------|--------------|--------------|---------|
| 1      | 14.305        | BV   | 0.3032      | 46.49001     | 2.26733      | 1.0839  |
| 2      | 18.194        | VB   | 0.3765      | 4242.54541   | 172.76634    | 98.9161 |

### Product 12f.

Racemic (Chiracel IA, 90(1% TFA):10 hexanes:IPA, 1 mL/min, 210 nm)

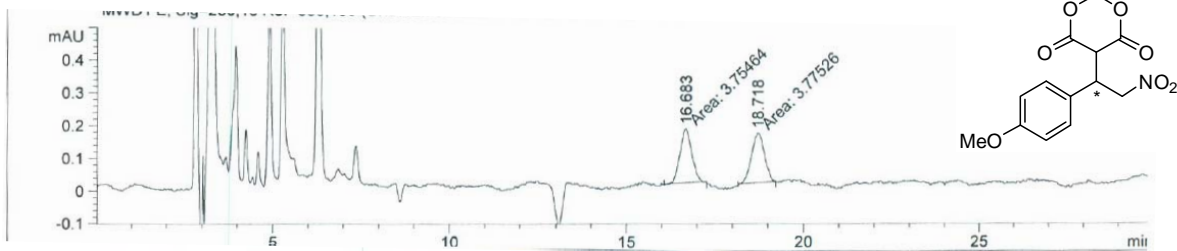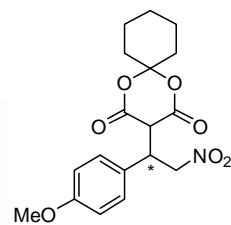

| Peak # | RetTime [min] | Type | Width [min] | Area [mAU*s] | Height [mAU] | Area %  |
|--------|---------------|------|-------------|--------------|--------------|---------|
| 1      | 16.683        | MM   | 0.3800      | 3.75464      | 1.64691e-1   | 49.8631 |
| 2      | 18.718        | MM   | 0.4163      | 3.77526      | 1.51146e-1   | 50.1369 |

Enantiomerically enriched (96% ee)

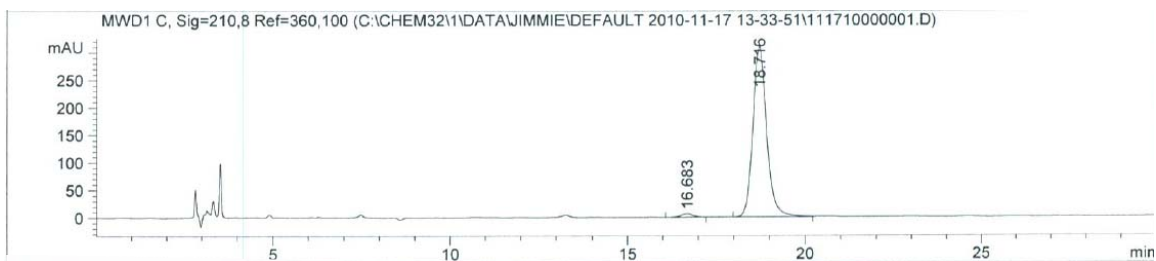

Signal 3: MWD1 D, Sig=230,16 Ref=360,100

| Peak # | RetTime [min] | Type | Width [min] | Area [mAU*s] | Height [mAU] | Area %  |
|--------|---------------|------|-------------|--------------|--------------|---------|
| 1      | 16.684        | BB   | 0.3573      | 108.54615    | 4.66804      | 1.7311  |
| 2      | 18.716        | BB   | 0.4107      | 6161.97021   | 228.44705    | 98.2689 |

## Product 12g.

Racemic (Chiracel IA, 90(1% TFA):10 hexanes:IPA, 1 mL/min, 210 nm)

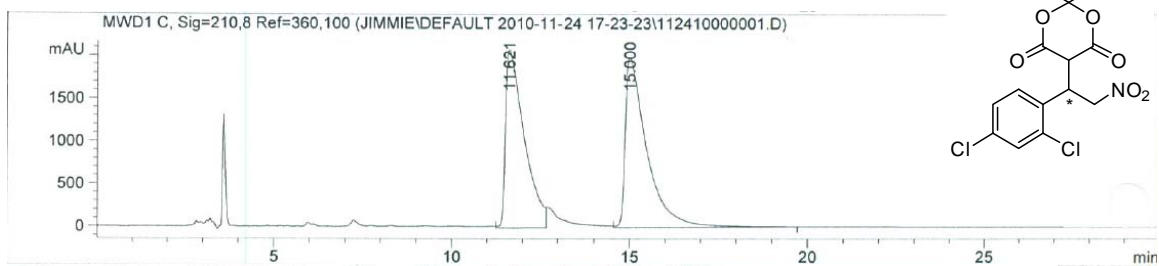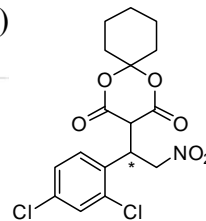

Signal 2: MWD1 C, Sig=210,8 Ref=360,100

| Peak # | RetTime [min] | Type | Width [min] | Area [mAU*s] | Height [mAU] | Area %  |
|--------|---------------|------|-------------|--------------|--------------|---------|
| 1      | 11.621        | VV   | 0.5449      | 7.64165e4    | 2078.62891   | 47.7471 |
| 2      | 15.000        | VB   | 0.6094      | 8.36279e4    | 1985.56482   | 52.2529 |

Enantiomerically enriched (96% ee)

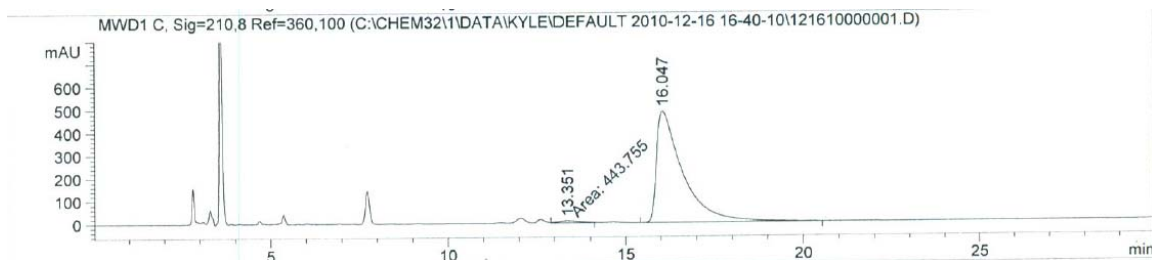

Signal 2: MWD1 C, Sig=210,8 Ref=360,100

| Peak # | RetTime [min] | Type | Width [min] | Area [mAU*s] | Height [mAU] | Area %  |
|--------|---------------|------|-------------|--------------|--------------|---------|
| 1      | 13.351        | MM   | 0.7691      | 443.75479    | 9.61618      | 1.7431  |
| 2      | 16.047        | VB   | 0.7198      | 2.50143e4    | 489.78738    | 98.2569 |

## Product 12h.

Racemic (Chiracel IA, 92(1% TFA):8 hexanes:EtOH, 1 mL/min, 210 nm)

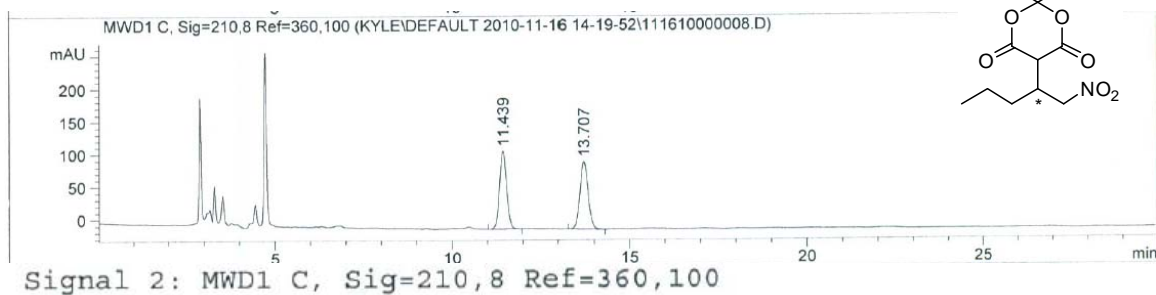

| Peak # | RetTime [min] | Type | Width [min] | Area [mAU*s] | Height [mAU] | Area %  |
|--------|---------------|------|-------------|--------------|--------------|---------|
| 1      | 11.439        | VB   | 0.2158      | 1660.03430   | 119.66300    | 49.9239 |
| 2      | 13.707        | BB   | 0.2478      | 1665.09375   | 103.41457    | 50.0761 |

Enantiomerically enriched (94% ee)

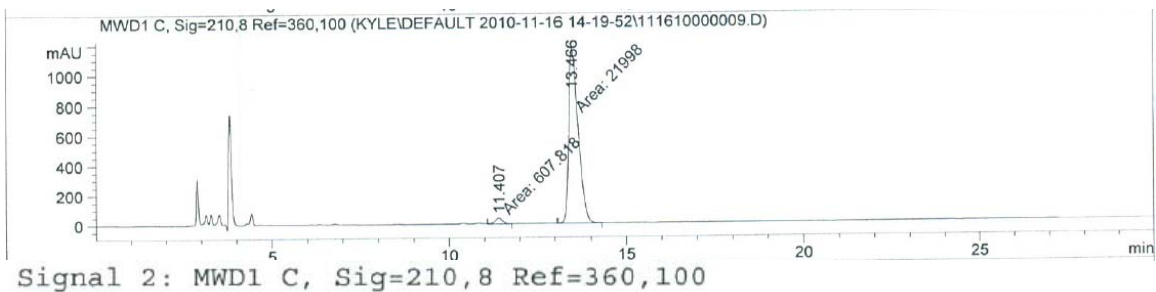

| Peak # | RetTime [min] | Type | Width [min] | Area [mAU*s] | Height [mAU] | Area %  |
|--------|---------------|------|-------------|--------------|--------------|---------|
| 1      | 11.407        | MM   | 0.2464      | 607.81775    | 41.10920     | 2.6888  |
| 2      | 13.466        | MM   | 0.3135      | 2.19980e4    | 1169.53650   | 97.3112 |

## Product 12i.

Racemic (Chiracel IA, 90(1% TFA):10 hexanes:IPA, 1 mL/min, 210 nm)

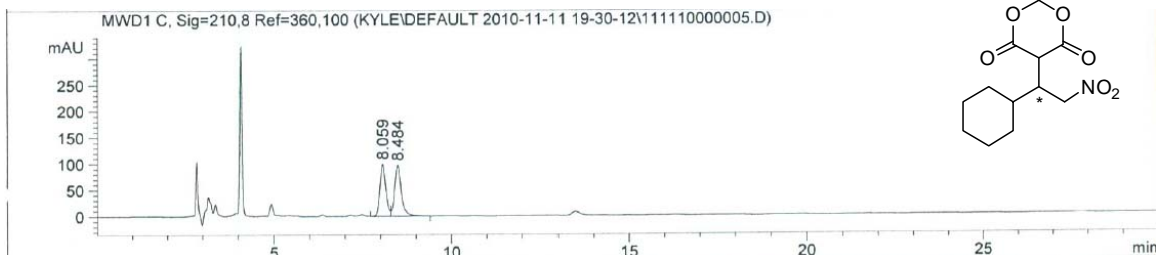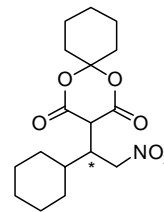

Signal 2: MWD1 C, Sig=210,8 Ref=360,100

| Peak # | RetTime [min] | Type | Width [min] | Area [mAU*s] | Height [mAU] | Area %  |
|--------|---------------|------|-------------|--------------|--------------|---------|
| 1      | 8.059         | VV   | 0.1773      | 1155.21533   | 99.59238     | 47.6443 |
| 2      | 8.484         | VB   | 0.1960      | 1269.44897   | 97.40547     | 52.3557 |

Enantiomerically enriched (96% ee)

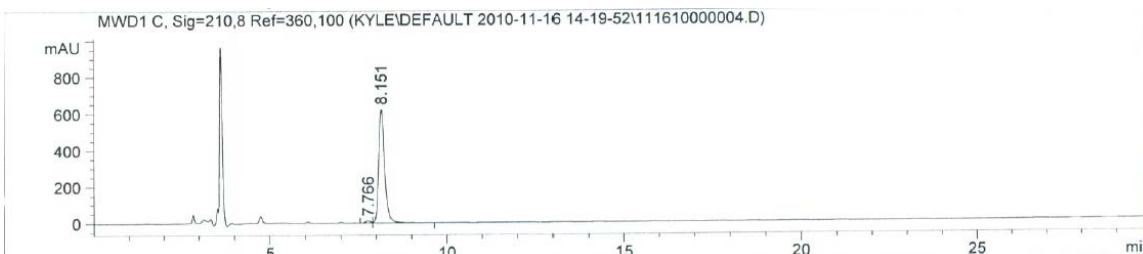

Signal 2: MWD1 C, Sig=210,8 Ref=360,100

| Peak # | RetTime [min] | Type | Width [min] | Area [mAU*s] | Height [mAU] | Area %  |
|--------|---------------|------|-------------|--------------|--------------|---------|
| 1      | 7.766         | VV   | 0.1654      | 135.95309    | 12.65262     | 1.8147  |
| 2      | 8.151         | VB   | 0.1780      | 7355.77637   | 621.73523    | 98.1853 |

## Product 14a.

Racemic (Chiracel IA, 92(1% TFA):8 hexanes:EtOH, 1 mL/min, 210 nm)

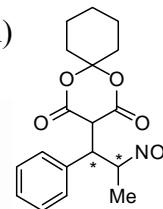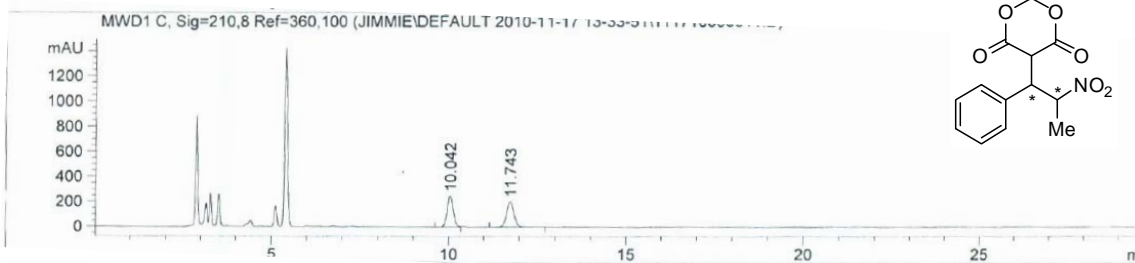

Signal 2: MWD1 C, Sig=210,8 Ref=360,100

| Peak # | RetTime [min] | Type | Width [min] | Area [mAU*s] | Height [mAU] | Area %  |
|--------|---------------|------|-------------|--------------|--------------|---------|
| 1      | 10.042        | VV   | 0.1861      | 3024.98975   | 248.41452    | 50.1504 |
| 2      | 11.743        | VB   | 0.2270      | 3006.84351   | 202.74911    | 49.8496 |

Enantiomerically enriched (93% ee)

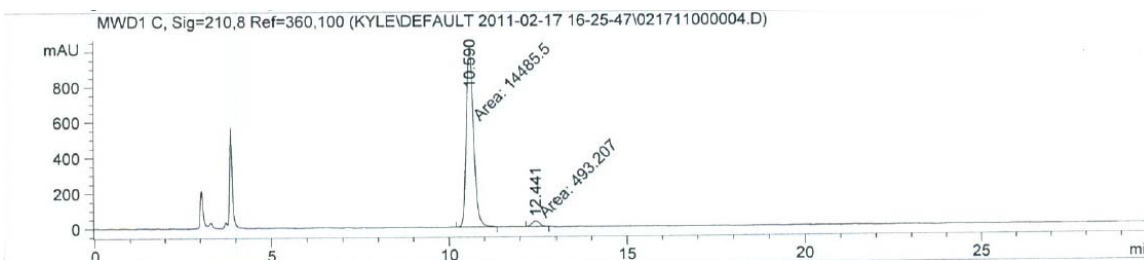

| Peak # | RetTime [min] | Type | Width [min] | Area [mAU*s] | Height [mAU] | Area %  |
|--------|---------------|------|-------------|--------------|--------------|---------|
| 1      | 10.590        | MM   | 0.2374      | 1.44855e4    | 1017.06580   | 96.7073 |
| 2      | 12.441        | MM   | 0.2614      | 493.20709    | 31.44804     | 3.2927  |



## Product 14b.

Racemic (Chiracel IA, 92(1% TFA):8 hexanes:EtOH, 1 mL/min, 210 nm)

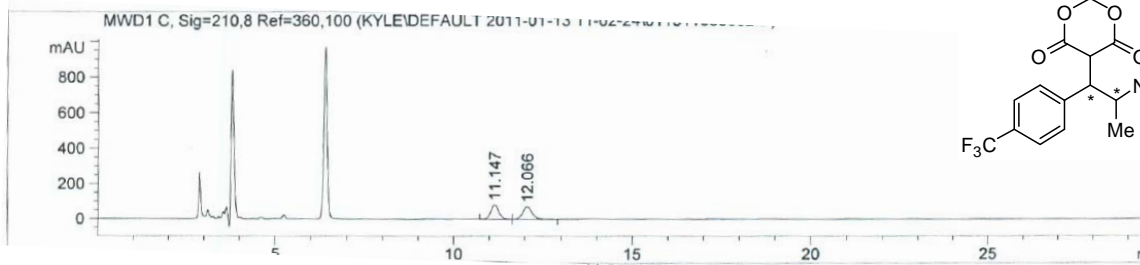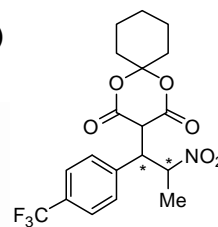

Signal 2: MWD1 C, Sig=210,8 Ref=360,100

| Peak # | RetTime [min] | Type | Width [min] | Area [mAU*s] | Height [mAU] | Area %  |
|--------|---------------|------|-------------|--------------|--------------|---------|
| 1      | 11.147        | VV   | 0.2434      | 1312.27698   | 82.59743     | 49.6280 |
| 2      | 12.066        | VB   | 0.2850      | 1331.95068   | 71.61419     | 50.3720 |

Enantiomerically enriched (94% ee)

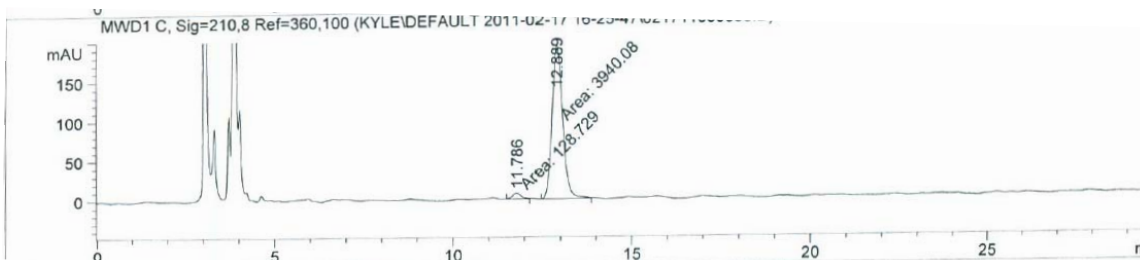

Signal 3: MWD1 C, Sig=210,8 Ref=360,100

| Peak # | RetTime [min] | Type | Width [min] | Area [mAU*s] | Height [mAU] | Area %  |
|--------|---------------|------|-------------|--------------|--------------|---------|
| 1      | 11.786        | MM   | 0.2987      | 128.72871    | 7.18237      | 3.1638  |
| 2      | 12.889        | MM   | 0.3442      | 3940.08423   | 190.77631    | 96.8362 |

## Product 14c.

Racemic (Chiracel IA, 92(1% TFA):8 hexanes:EtOH, 1 mL/min, 210 nm)

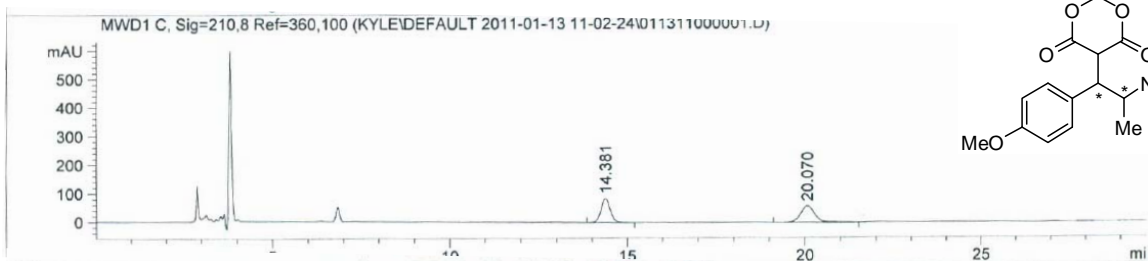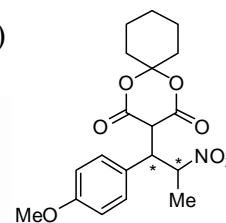

Signal 2: MWD1 C, Sig=210,8 Ref=360,100

| Peak # | RetTime [min] | Type | Width [min] | Area [mAU*s] | Height [mAU] | Area %  |
|--------|---------------|------|-------------|--------------|--------------|---------|
| 1      | 14.381        | BB   | 0.2811      | 1555.71436   | 85.17610     | 49.0931 |
| 2      | 20.070        | VB   | 0.4207      | 1613.19116   | 58.31782     | 50.9069 |

Enantiomerically enriched (92% ee)

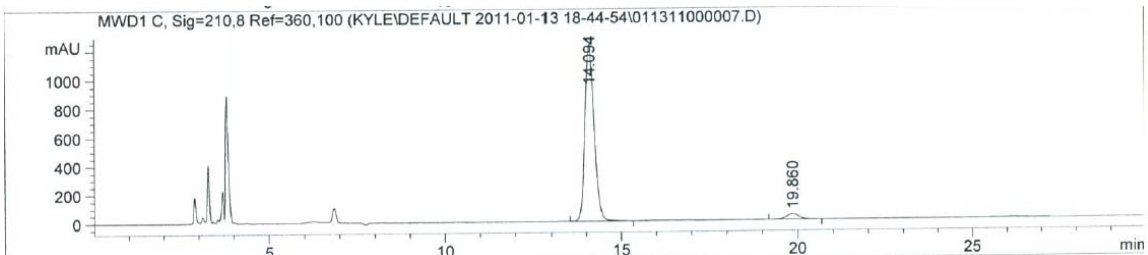

| Peak # | RetTime [min] | Type | Width [min] | Area [mAU*s] | Height [mAU] | Area %  |
|--------|---------------|------|-------------|--------------|--------------|---------|
| 1      | 14.094        | VB   | 0.2810      | 2.25246e4    | 1233.74744   | 95.9480 |
| 2      | 19.860        | BB   | 0.3869      | 951.25140    | 37.88362     | 4.0520  |



## Product 14d.

Racemic (Chiracel IA, 92(1% TFA):8 hexanes:EtOH, 0.8 mL/min, 210 nm

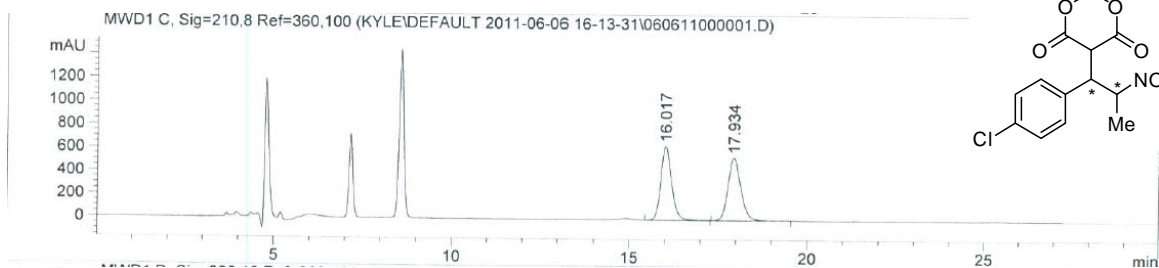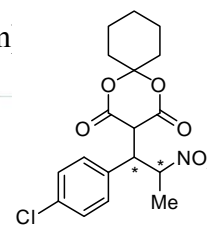

Signal 2: MWD1 C, Sig=210,8 Ref=360,100

| Peak # | RetTime [min] | Type | Width [min] | Area [mAU*s] | Height [mAU] | Area %  |
|--------|---------------|------|-------------|--------------|--------------|---------|
| 1      | 16.017        | VB   | 0.3228      | 1.35458e4    | 640.33673    | 49.9698 |
| 2      | 17.934        | BB   | 0.3835      | 1.35621e4    | 542.87994    | 50.0302 |

Enantiomerically enriched (91% ee)

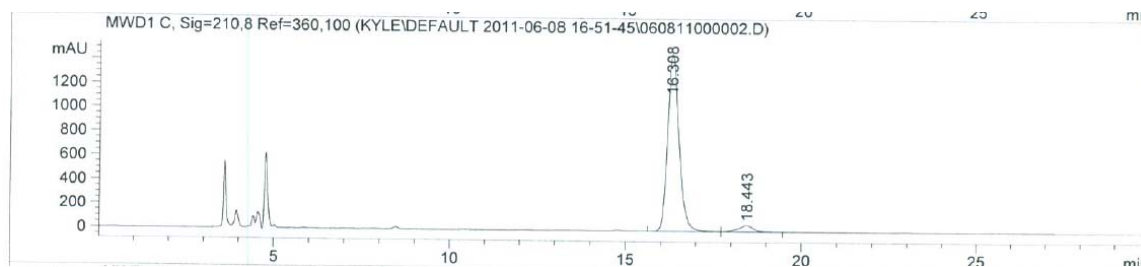

Signal 2: MWD1 C, Sig=210,8 Ref=360,100

| Peak # | RetTime [min] | Type | Width [min] | Area [mAU*s] | Height [mAU] | Area %  |
|--------|---------------|------|-------------|--------------|--------------|---------|
| 1      | 16.308        | VV   | 0.3434      | 3.32120e4    | 1470.83679   | 95.5132 |
| 2      | 18.443        | VB   | 0.4498      | 1560.17578   | 50.59335     | 4.4868  |

## Product 14e.

Racemic (Chiracel IA, 92(1% TFA):8 hexanes:EtOH, 0.8 mL/min, 210 nm)

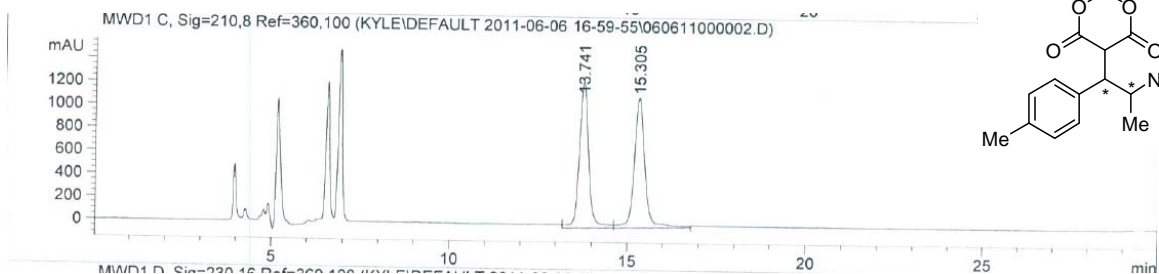

Signal 2: MWD1 C, Sig=210,8 Ref=360,100

| Peak # | RetTime [min] | Type | Width [min] | Area [mAU*s] | Height [mAU] | Area %  |
|--------|---------------|------|-------------|--------------|--------------|---------|
| 1      | 13.741        | BV   | 0.2752      | 2.32784e4    | 1274.03772   | 49.5223 |
| 2      | 15.305        | VB   | 0.3167      | 2.37274e4    | 1122.00000   | 50.4777 |

Enantiomerically enriched (92% ee)

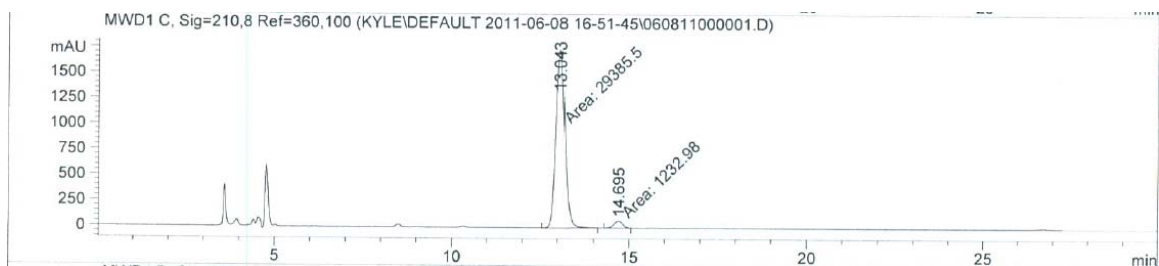

Signal 2: MWD1 C, Sig=210,8 Ref=360,100

| Peak # | RetTime [min] | Type | Width [min] | Area [mAU*s] | Height [mAU] | Area %  |
|--------|---------------|------|-------------|--------------|--------------|---------|
| 1      | 13.043        | MM   | 0.2811      | 2.93855e4    | 1742.01489   | 95.9731 |
| 2      | 14.695        | MM   | 0.2939      | 1232.97864   | 69.92357     | 4.0269  |

## Product 14f.

Racemic (Chiracel IA, 92(1% TFA):8 hexanes:EtOH, 1 mL/min, 210 nm)

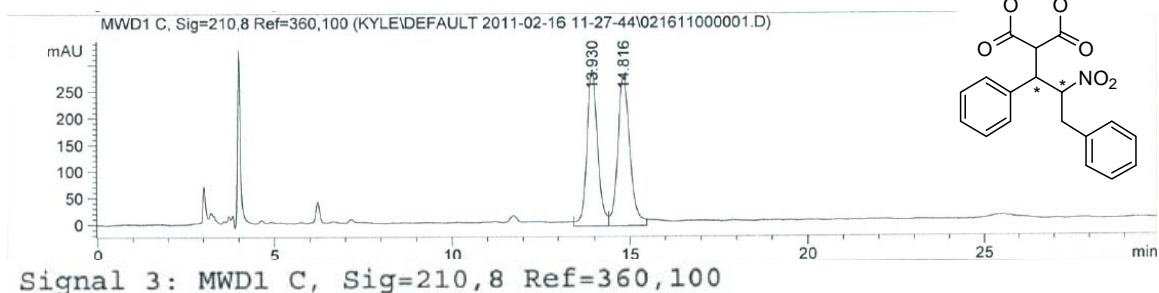

| Peak # | RetTime [min] | Type | Width [min] | Area [mAU*s] | Height [mAU] | Area %  |
|--------|---------------|------|-------------|--------------|--------------|---------|
| 1      | 13.930        | VV   | 0.3203      | 6160.19043   | 294.23013    | 47.8921 |
| 2      | 14.816        | VV   | 0.3530      | 6702.44678   | 282.30951    | 52.1079 |

Enantiomerically enriched (90% ee)

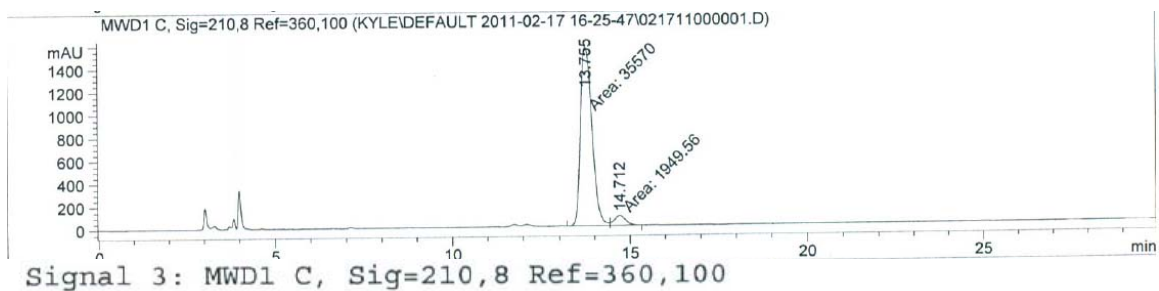

| Peak # | RetTime [min] | Type | Width [min] | Area [mAU*s] | Height [mAU] | Area %  |
|--------|---------------|------|-------------|--------------|--------------|---------|
| 1      | 13.755        | MM   | 0.3800      | 3.55700e4    | 1559.89685   | 94.8039 |
| 2      | 14.712        | MM   | 0.3749      | 1949.55615   | 86.67139     | 5.1961  |

## Product 14g.

Racemic (Chiracel IA, 92(1% TFA):8 hexanes:EtOH, 1 mL/min, 210 nm)

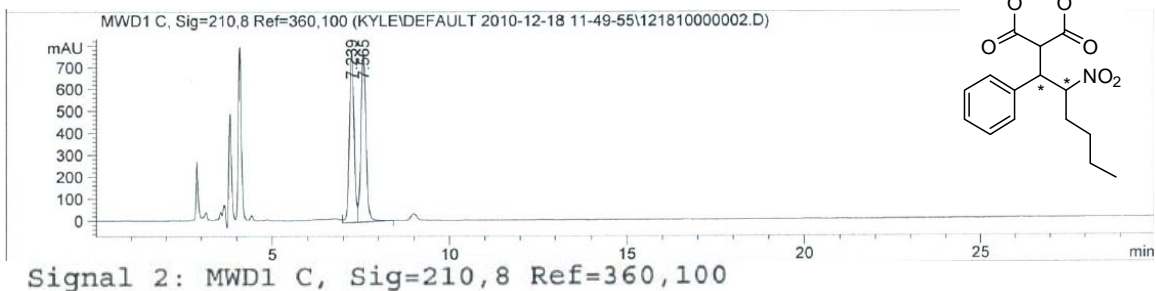

| Peak # | RetTime [min] | Type | Width [min] | Area [mAU*s] | Height [mAU] | Area %  |
|--------|---------------|------|-------------|--------------|--------------|---------|
| 1      | 7.239         | VV   | 0.1403      | 7094.31934   | 778.26367    | 48.2328 |
| 2      | 7.565         | VB   | 0.1508      | 7614.17822   | 773.90112    | 51.7672 |

Enantiomerically enriched (83% ee)

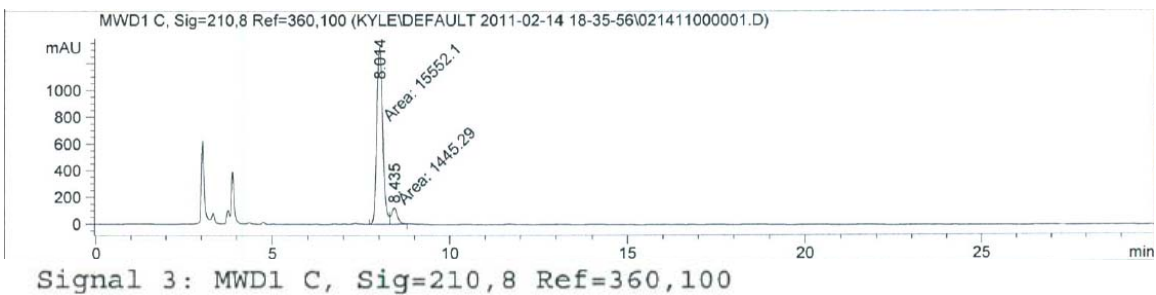

| Peak # | RetTime [min] | Type | Width [min] | Area [mAU*s] | Height [mAU] | Area %  |
|--------|---------------|------|-------------|--------------|--------------|---------|
| 1      | 8.014         | MM   | 0.1958      | 1.55521e4    | 1323.97107   | 91.4970 |
| 2      | 8.435         | MM   | 0.1961      | 1445.28528   | 122.84429    | 8.5030  |

## Product 14h.

Racemic (Chiracel IA, 90(1% TFA):10 hexanes:IPA, 1 mL/min, 210 nm)

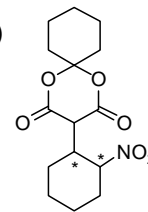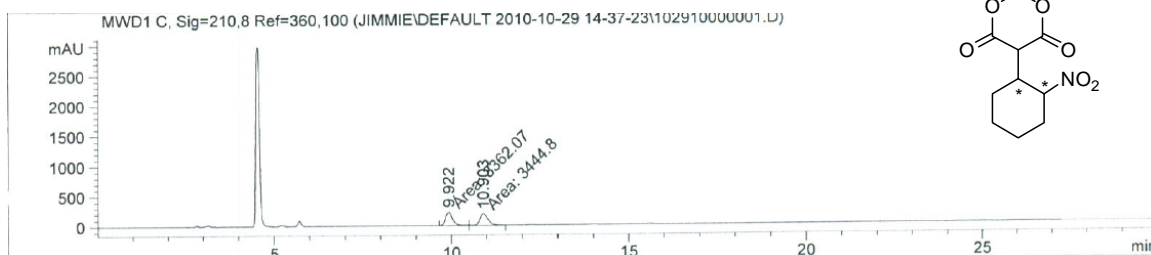

Signal 2: MWD1 C, Sig=210,8 Ref=360,100

| Peak # | RetTime [min] | Type | Width [min] | Area [mAU*s] | Height [mAU] | Area %  |
|--------|---------------|------|-------------|--------------|--------------|---------|
| 1      | 9.922         | MF   | 0.2420      | 3362.06812   | 231.56804    | 49.3923 |
| 2      | 10.903        | FM   | 0.2835      | 3444.80469   | 202.51933    | 50.6077 |

Enantiomerically enriched (91% ee)

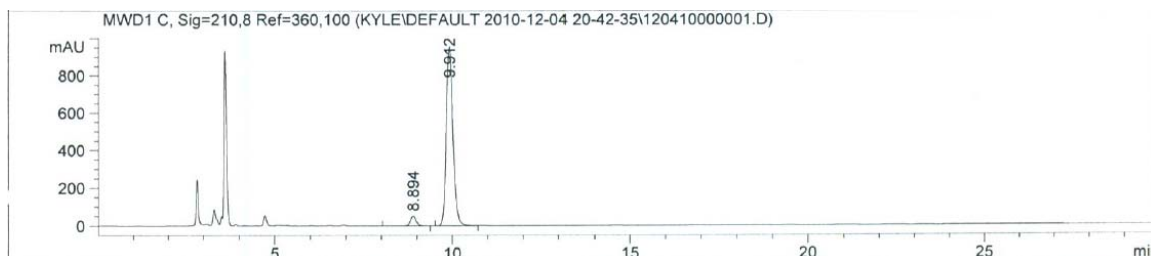

Signal 2: MWD1 C, Sig=210,8 Ref=360,100

| Peak # | RetTime [min] | Type | Width [min] | Area [mAU*s] | Height [mAU] | Area %  |
|--------|---------------|------|-------------|--------------|--------------|---------|
| 1      | 8.894         | VB   | 0.1741      | 584.49542    | 51.62966     | 4.4749  |
| 2      | 9.912         | BB   | 0.2000      | 1.24771e4    | 957.41907    | 95.5251 |

## Product 14i.

Racemic (Chiracel IA, 90(1% TFA):10 hexanes:IPA, 1 mL/min, 210 nm)

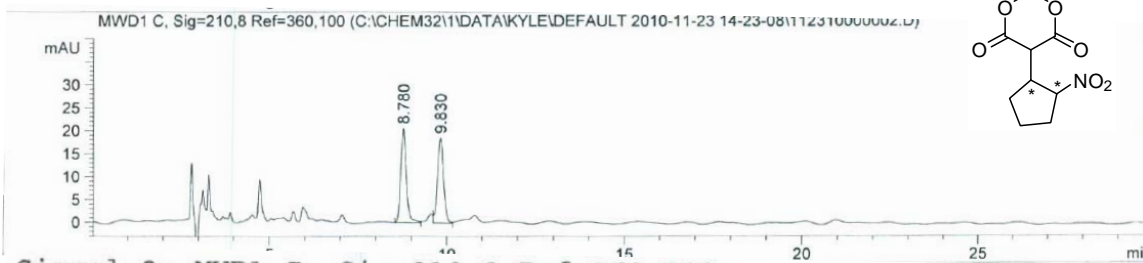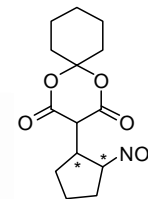

Signal 2: MWD1 C, Sig=210,8 Ref=360,100

| Peak # | RetTime [min] | Type | Width [min] | Area [mAU*s] | Height [mAU] | Area %  |
|--------|---------------|------|-------------|--------------|--------------|---------|
| 1      | 8.780         | BB   | 0.1655      | 224.47943    | 20.54615     | 50.3349 |
| 2      | 9.830         | VB   | 0.1835      | 221.49229    | 18.52153     | 49.6651 |

Enantiomerically enriched (97% ee)

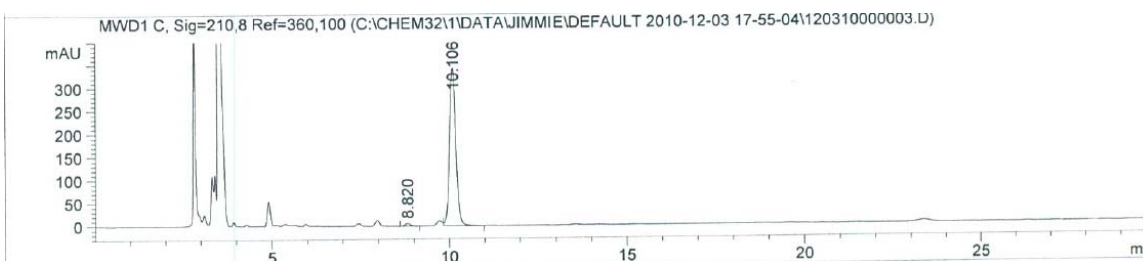

Signal 2: MWD1 C, Sig=210,8 Ref=360,100

| Peak # | RetTime [min] | Type | Width [min] | Area [mAU*s] | Height [mAU] | Area %  |
|--------|---------------|------|-------------|--------------|--------------|---------|
| 1      | 8.820         | BB   | 0.1649      | 62.75285     | 5.85931      | 1.4546  |
| 2      | 10.106        | VB   | 0.1925      | 4251.27051   | 343.24030    | 98.5454 |



## Product 14j.

Racemic (Chiracel IA, 90(1% TFA):10 hexanes:IPA, 1 mL/min, 210 nm)

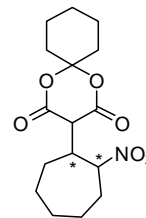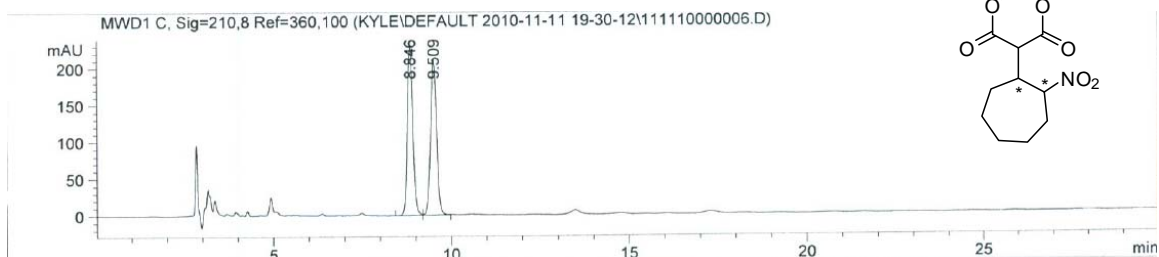

Signal 2: MWD1 C, Sig=210,8 Ref=360,100

| Peak # | RetTime [min] | Type | Width [min] | Area [mAU*s] | Height [mAU] | Area %  |
|--------|---------------|------|-------------|--------------|--------------|---------|
| 1      | 8.846         | BV   | 0.1652      | 2444.88623   | 227.88142    | 49.5233 |
| 2      | 9.509         | VB   | 0.1819      | 2491.95557   | 210.75783    | 50.4767 |

Enantiomerically enriched (98% ee)

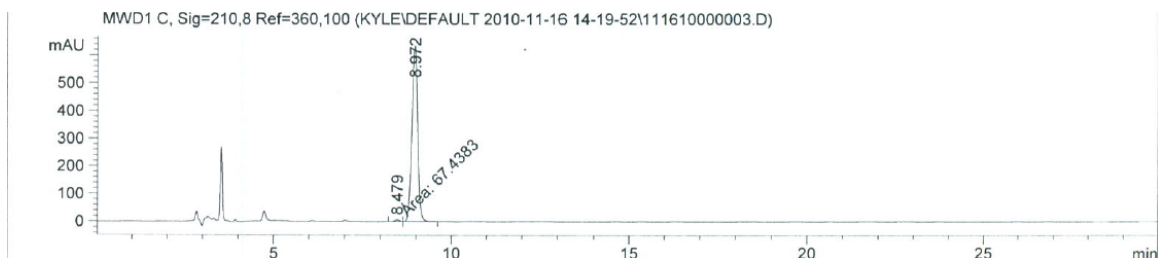

Signal 2: MWD1 C, Sig=210,8 Ref=360,100

| Peak # | RetTime [min] | Type | Width [min] | Area [mAU*s] | Height [mAU] | Area %  |
|--------|---------------|------|-------------|--------------|--------------|---------|
| 1      | 8.479         | MM   | 0.1606      | 67.43831     | 6.99987      | 0.9293  |
| 2      | 8.972         | VB   | 0.1761      | 7189.48926   | 635.02319    | 99.0707 |
